# Supplementary material for: Silencing FLI or targeting CD13/ANPEP lead to dephosphorylation of EPHA2, a mediator of BRAF inhibitor resistance, and induce growth arrest or apoptosis in melanoma cells
Source: PubMed Central journal article supplement (PMC5596587; doi:10.1038/cddis.2017.406), 2017-08-31
Supplement: cddis2017406x2.pdf [file cddis2017406x2.pdf]

**Supplementary Table 1.** Mutation screening/validation results for A375 and three BRAF inhibitor resistant sub-lines, consensus denotes according to database sequence

| <b>Genes</b>                                                                                                    | <b>A375parental</b>                 | <b>A375PR1</b>                      | <b>A375VR3</b>                      | <b>A375VR4</b>                      |
|-----------------------------------------------------------------------------------------------------------------|-------------------------------------|-------------------------------------|-------------------------------------|-------------------------------------|
| <b>NRAS</b>                                                                                                     | consensus                           | consensus                           | consensus                           | consensus                           |
| <b>KRAS</b>                                                                                                     | consensus                           | consensus                           | consensus                           | consensus                           |
| <b>RRAS</b><br>g.49635672G>A; g. 49636788G>A;<br>g.49636811G>A;<br>NM_006270:c.C333T: p.111N>N<br>g.49636835C>T | all four variants<br>(heterozygous) | all four variants<br>(heterozygous) | all four variants<br>(heterozygous) | all four variants<br>(heterozygous) |
| <b>BRAF</b><br>g.171429T>A:p.V600E                                                                              | p.V600E                             | p.V600E                             | p.V600E                             | p.V600E                             |
| <b>RAC1</b><br>g.6387309C>T, g.6392059C>T                                                                       | g.6387309CC>TT<br>g.6392059CC>TT    | g.6387309CC>TT<br>g.6392059CC>TT    | g.6387309CC>TT<br>g.6392059CC>TT    | g.6387309CC>TT<br>g.6392059CC>TT    |
| <b>MET</b><br>(exons 1-3, 16-20)                                                                                | consensus                           | consensus                           | consensus                           | consensus                           |
| <b>PTEN</b><br>(exon 1, exons 3-6, exons 10-13)                                                                 | consensus                           | consensus                           | consensus                           | Consensus                           |
