# Supplementary material for: Silencing FLI or targeting CD13/ANPEP lead to dephosphorylation of EPHA2, a mediator of BRAF inhibitor resistance, and induce growth arrest or apoptosis in melanoma cells
Source: PubMed Central journal article supplement (PMC5596587; doi:10.1038/cddis.2017.406), 2017-08-31
Supplement: cddis2017406x3.pdf [file cddis2017406x3.pdf]

## A375 vs. A375PR1

| Gene ID  | Gene Name                                                                                                                      | Fold Change  | q-value(%) |
|----------|--------------------------------------------------------------------------------------------------------------------------------|--------------|------------|
| O75525-2 | <a href="#">Isoform 2 of KH domain-containing, RNA-binding, signal transduction-associated protein 3 OS=Homo sapiens GN=Kl</a> | 19,15        | 0,00       |
| Q17RY6   | <a href="#">Lymphocyte antigen 6K OS=Homo sapiens GN=LY6K PE=1 SV=2 - [LY6K HUMAN]</a>                                         | 55,72        | 0,00       |
| Q6UX53   | <a href="#">Methyltransferase-like protein 7B OS=Homo sapiens GN=METTL7B PE=2 SV=2 - [MET7B HUMAN]</a>                         | 13,49        | 0,00       |
| P43355   | <a href="#">Melanoma-associated antigen 1 OS=Homo sapiens GN=MAGEA1 PE=1 SV=1 - [MAGA1 HUMAN]</a>                              | 50,18        | 0,00       |
| O14684   | <a href="#">Prostaglandin E synthase OS=Homo sapiens GN=PTGES PE=1 SV=2 - [PTGES HUMAN]</a>                                    | 739171214,08 | 0,00       |
| P15144   | <a href="#">Aminopeptidase N OS=Homo sapiens GN=ANPEP PE=1 SV=4 - [AMPN HUMAN]</a>                                             | 6,38         | 0,00       |
| Q96FQ6   | <a href="#">Protein S100-A16 OS=Homo sapiens GN=S100A16 PE=1 SV=1 - [S10AG HUMAN]</a>                                          | 3,38         | 0,00       |
| Q68CR1-3 | <a href="#">Isoform 3 of Protein sel-1 homolog 3 OS=Homo sapiens GN=SEL1L3 - [SE1L3 HUMAN]</a>                                 | 48,51        | 0,00       |
| Q16698   | <a href="#">2,4-dienoyl-CoA reductase, mitochondrial OS=Homo sapiens GN=DECR1 PE=1 SV=1 - [DECR HUMAN]</a>                     | 3,12         | 0,00       |
| Q9NP90   | <a href="#">Ras-related protein Rab-9B OS=Homo sapiens GN=RAB9B PE=1 SV=1 - [RAB9B HUMAN]</a>                                  | 5,89         | 0,00       |
| Q12797   | <a href="#">Aspartyl/asparaginyl beta-hydroxylase OS=Homo sapiens GN=ASPH PE=1 SV=3 - [ASPH HUMAN]</a>                         | 4,27         | 0,00       |
| Q9Y5S1   | <a href="#">Transient receptor potential cation channel subfamily V member 2 OS=Homo sapiens GN=TRPV2 PE=1 SV=1 - [TRPV</a>    | 6,41         | 0,00       |
| Q11201   | <a href="#">CMP-N-acetylneuraminate-beta-galactosamide-alpha-2,3-sialyltransferase 1 OS=Homo sapiens GN=ST3GAL1 PE=2</a>       | 6,79         | 0,00       |
| P11498   | <a href="#">Pyruvate carboxylase, mitochondrial OS=Homo sapiens GN=PC PE=1 SV=2 - [PYC HUMAN]</a>                              | 3,59         | 0,00       |
| P43304   | <a href="#">Glycerol-3-phosphate dehydrogenase, mitochondrial OS=Homo sapiens GN=GPD2 PE=1 SV=3 - [GPDM HUMAN]</a>             | 2,58         | 0,00       |
| Q16762   | <a href="#">Thiosulfate sulfurtransferase OS=Homo sapiens GN=TST PE=1 SV=4 - [THTR HUMAN]</a>                                  | 2,60         | 0,00       |
| Q9UKA9   | <a href="#">Polypyrimidine tract-binding protein 2 OS=Homo sapiens GN=PTBP2 PE=1 SV=1 - [PTBP2 HUMAN]</a>                      | 6,84         | 0,00       |
| Q9UBG0   | <a href="#">C-type mannose receptor 2 OS=Homo sapiens GN=MRC2 PE=1 SV=2 - [MRC2 HUMAN]</a>                                     | 2,75         | 0,00       |
| Q9UKU7   | <a href="#">Isobutyryl-CoA dehydrogenase, mitochondrial OS=Homo sapiens GN=ACAD8 PE=1 SV=1 - [ACAD8 HUMAN]</a>                 | 3,04         | 0,00       |
| O60513   | <a href="#">Beta-1,4-galactosyltransferase 4 OS=Homo sapiens GN=B4GALT4 PE=1 SV=1 - [B4GT4 HUMAN]</a>                          | 3,03         | 0,00       |
| Q9NTG7   | <a href="#">NAD-dependent deacetylase sirtuin-3, mitochondrial OS=Homo sapiens GN=SIRT3 PE=1 SV=2 - [SIRT3 HUMAN]</a>          | 2,09         | 0,00       |
| P10253   | <a href="#">Lysosomal alpha-glucosidase OS=Homo sapiens GN=GAA PE=1 SV=4 - [LYAG HUMAN]</a>                                    | 2,30         | 0,00       |
| P33897   | <a href="#">ATP-binding cassette sub-family D member 1 OS=Homo sapiens GN=ABCD1 PE=1 SV=2 - [ABCD1 HUMAN]</a>                  | 3,55         | 0,00       |
| Q8TB22-3 | <a href="#">Isoform 3 of Spermatogenesis-associated protein 20 OS=Homo sapiens GN=SPATA20 - [SPT20 HUMAN]</a>                  | 2,69         | 0,00       |
| Q7Z7M9   | <a href="#">Polypeptide N-acetylgalactosaminyltransferase 5 OS=Homo sapiens GN=GALNT5 PE=1 SV=1 - [GALT5 HUMAN]</a>            | 4,74         | 0,00       |
| Q9Y6C2   | <a href="#">EMILIN-1 OS=Homo sapiens GN=EMILIN1 PE=1 SV=2 - [EMIL1 HUMAN]</a>                                                  | 2,67         | 0,00       |
| Q9BRX8-2 | <a href="#">Isoform 2 of Redox-regulatory protein FAM213A OS=Homo sapiens GN=FAM213A - [F213A HUMAN]</a>                       | 5,75         | 0,00       |
| Q92673   | <a href="#">Sortilin-related receptor OS=Homo sapiens GN=SORL1 PE=1 SV=2 - [SORL HUMAN]</a>                                    | 2,86         | 0,00       |
| P49748-2 | <a href="#">Isoform 2 of Very long-chain specific acyl-CoA dehydrogenase, mitochondrial OS=Homo sapiens GN=ACADVL - [ACA</a>   | 3,25         | 0,00       |
| P32004-2 | <a href="#">Isoform 2 of Neural cell adhesion molecule L1 OS=Homo sapiens GN=L1CAM - [L1CAM HUMAN]</a>                         | 4,57         | 0,00       |
| Q9Y305-3 | <a href="#">Isoform 3 of Acyl-coenzyme A thioesterase 9, mitochondrial OS=Homo sapiens GN=ACOT9 - [ACOT9 HUMAN]</a>            | 2,48         | 0,00       |
| Q15118   | <a href="#">[Pyruvate dehydrogenase [lipoamide]] kinase isozyme 1, mitochondrial OS=Homo sapiens GN=PDK1 PE=1 SV=1 - [P</a>    | 3,76         | 0,00       |

## A375 vs. A375PR1

|          |                                                                                                                                  |      |      |
|----------|----------------------------------------------------------------------------------------------------------------------------------|------|------|
| Q9ULI3   | <a href="#">Protein HEG homolog 1 OS=Homo sapiens GN=HEG1 PE=1 SV=3 - [HEG1 HUMAN]</a>                                           | 2,47 | 0,00 |
| Q9UHK6   | <a href="#">Alpha-methylacyl-CoA racemase OS=Homo sapiens GN=AMACR PE=1 SV=2 - [AMACR HUMAN]</a>                                 | 5,32 | 0,00 |
| Q6ZMZ3   | <a href="#">Nesprin-3 OS=Homo sapiens GN=C14orf49 PE=1 SV=2 - [SYNE3 HUMAN]</a>                                                  | 2,09 | 0,00 |
| Q8NFV4-4 | <a href="#">Isoform 4 of Abhydrolase domain-containing protein 11 OS=Homo sapiens GN=ABHD11 - [ABHDB HUMAN]</a>                  | 1,98 | 0,00 |
| Q70UQ0   | <a href="#">Inhibitor of nuclear factor kappa-B kinase-interacting protein OS=Homo sapiens GN=IKBIP PE=1 SV=1 - [IKIP HUMA]</a>  | 2,26 | 0,00 |
| O15484   | <a href="#">Calpain-5 OS=Homo sapiens GN=CAPN5 PE=1 SV=2 - [CAN5 HUMAN]</a>                                                      | 2,59 | 0,00 |
| Q5T3J3-2 | <a href="#">Isoform 2 of Ligand-dependent nuclear receptor-interacting factor 1 OS=Homo sapiens GN=LRIF1 - [LRIF1 HUMAN]</a>     | 2,01 | 0,00 |
| Q9BQE5   | <a href="#">Apolipoprotein L2 OS=Homo sapiens GN=APOL2 PE=1 SV=1 - [APOL2 HUMAN]</a>                                             | 3,07 | 0,00 |
| Q13636   | <a href="#">Ras-related protein Rab-31 OS=Homo sapiens GN=RAB31 PE=1 SV=1 - [RAB31 HUMAN]</a>                                    | 2,18 | 0,00 |
| Q16134   | <a href="#">Electron transfer flavoprotein-ubiquinone oxidoreductase, mitochondrial OS=Homo sapiens GN=ETFDH PE=1 SV=2</a>       | 2,18 | 0,00 |
| Q8TB37-2 | <a href="#">Isoform 2 of Iron-sulfur protein NUBPL OS=Homo sapiens GN=NUBPL - [NUBPL HUMAN]</a>                                  | 2,21 | 0,00 |
| Q3KR37-2 | <a href="#">Isoform 2 of GRAM domain-containing protein 1B OS=Homo sapiens GN=GRAMD1B - [GRM1B HUMAN]</a>                        | 4,85 | 0,00 |
| O60353   | <a href="#">Frizzled-6 OS=Homo sapiens GN=FZD6 PE=1 SV=2 - [FZD6 HUMAN]</a>                                                      | 2,11 | 0,00 |
| P21589   | <a href="#">5'-nucleotidase OS=Homo sapiens GN=NT5E PE=1 SV=1 - [5NTD HUMAN]</a>                                                 | 2,42 | 0,00 |
| Q15120   | <a href="#">[Pyruvate dehydrogenase [lipoamide]] kinase isozyme 3, mitochondrial OS=Homo sapiens GN=PDK3 PE=1 SV=1 - [P</a>      | 2,86 | 0,00 |
| P53794   | <a href="#">Sodium/myo-inositol cotransporter OS=Homo sapiens GN=SLC5A3 PE=2 SV=2 - [SC5A3 HUMAN]</a>                            | 2,70 | 0,00 |
| Q13488   | <a href="#">V-type proton ATPase 116 kDa subunit a isoform 3 OS=Homo sapiens GN=TCIRG1 PE=1 SV=3 - [VPP3 HUMAN]</a>              | 1,87 | 0,00 |
| Q5T5S1   | <a href="#">Uncharacterized coiled-coil domain-containing protein KIAA1984 OS=Homo sapiens GN=KIAA1984 PE=2 SV=3 - [K19</a>      | 3,73 | 0,00 |
| P08294   | <a href="#">Extracellular superoxide dismutase [Cu-Zn] OS=Homo sapiens GN=SOD3 PE=1 SV=2 - [SODE HUMAN]</a>                      | 4,67 | 0,00 |
| Q9HBH5   | <a href="#">Retinol dehydrogenase 14 OS=Homo sapiens GN=RDH14 PE=1 SV=1 - [RDH14 HUMAN]</a>                                      | 2,07 | 0,00 |
| Q9UBS9   | <a href="#">Protein osteopotenia homolog OS=Homo sapiens GN=C1orf9 PE=2 SV=1 - [OSPT HUMAN]</a>                                  | 2,63 | 0,00 |
| Q96AQ6-2 | <a href="#">Isoform 2 of Pre-B-cell leukemia transcription factor-interacting protein 1 OS=Homo sapiens GN=PBXIP1 - [PBIP1 H</a> | 2,31 | 0,00 |
| Q9UQ53-2 | <a href="#">Isoform 2 of Alpha-1,3-mannosyl-glycoprotein 4-beta-N-acetylglucosaminyltransferase B OS=Homo sapiens GN=MC</a>      | 2,36 | 0,00 |
| Q9NRW1   | <a href="#">Ras-related protein Rab-6B OS=Homo sapiens GN=RAB6B PE=1 SV=1 - [RAB6B HUMAN]</a>                                    | 1,91 | 0,00 |
| Q53TN4   | <a href="#">Cytochrome b reductase 1 OS=Homo sapiens GN=CYBRD1 PE=1 SV=1 - [CYBR1 HUMAN]</a>                                     | 2,89 | 0,00 |
| Q7Z402   | <a href="#">Transmembrane channel-like protein 7 OS=Homo sapiens GN=TMC7 PE=2 SV=1 - [TMC7 HUMAN]</a>                            | 2,16 | 0,00 |
| P40616   | <a href="#">ADP-ribosylation factor-like protein 1 OS=Homo sapiens GN=ARL1 PE=1 SV=1 - [ARL1 HUMAN]</a>                          | 1,85 | 0,00 |
| Q02809   | <a href="#">Procollagen-lysine,2-oxoglutarate 5-dioxygenase 1 OS=Homo sapiens GN=PLOD1 PE=1 SV=2 - [PLOD1 HUMAN]</a>             | 2,17 | 0,00 |
| P07099   | <a href="#">Epoxide hydrolase 1 OS=Homo sapiens GN=EPHX1 PE=1 SV=1 - [HYEP HUMAN]</a>                                            | 2,93 | 0,00 |
| Q99536   | <a href="#">Synaptic vesicle membrane protein VAT-1 homolog OS=Homo sapiens GN=VAT1 PE=1 SV=2 - [VAT1 HUMAN]</a>                 | 2,01 | 0,00 |
| P01033   | <a href="#">Metalloproteinase inhibitor 1 OS=Homo sapiens GN=TIMP1 PE=1 SV=1 - [TIMP1 HUMAN]</a>                                 | 1,97 | 0,00 |
| Q9H1J7   | <a href="#">Protein Wnt-5b OS=Homo sapiens GN=WNT5B PE=2 SV=2 - [WNT5B HUMAN]</a>                                                | 2,92 | 0,00 |
| O00220   | <a href="#">Tumor necrosis factor receptor superfamily member 10A OS=Homo sapiens GN=TNFRSF10A PE=1 SV=3 - [TR10A H</a>          | 2,05 | 0,00 |

### A375 vs. A375PR1

|          |                                                                                                                                        |        |      |
|----------|----------------------------------------------------------------------------------------------------------------------------------------|--------|------|
| Q12983   | <a href="#">BCL2/adenovirus E1B 19 kDa protein-interacting protein 3 OS=Homo sapiens GN=BNIP3 PE=1 SV=2 - [BNIP3_HUMAN]</a>            | 6,84   | 0,00 |
| Q7L3T8   | <a href="#">Probable proline--tRNA ligase, mitochondrial OS=Homo sapiens GN=PARS2 PE=1 SV=1 - [SYPM_HUMAN]</a>                         | 2,11   | 0,00 |
| Q9H2D1   | <a href="#">Mitochondrial folate transporter/carrier OS=Homo sapiens GN=SLC25A32 PE=1 SV=2 - [MFTC_HUMAN]</a>                          | 2,10   | 0,00 |
| P55290   | <a href="#">Cadherin-13 OS=Homo sapiens GN=CDH13 PE=1 SV=1 - [CAD13_HUMAN]</a>                                                         | 3,92   | 0,00 |
| Q9H568   | <a href="#">Actin-like protein 8 OS=Homo sapiens GN=ACTL8 PE=2 SV=1 - [ACTL8_HUMAN]</a>                                                | 2,71   | 0,00 |
| Q7Z2K6   | <a href="#">Endoplasmic reticulum metalloproteinase 1 OS=Homo sapiens GN=ERMP1 PE=1 SV=2 - [ERMP1_HUMAN]</a>                           | 1,91   | 0,00 |
| O00194   | <a href="#">Ras-related protein Rab-27B OS=Homo sapiens GN=RAB27B PE=1 SV=4 - [RB27B_HUMAN]</a>                                        | 3,88   | 0,00 |
| Q70UQ0-4 | <a href="#">Isoform 4 of Inhibitor of nuclear factor kappa-B kinase-interacting protein OS=Homo sapiens GN=IKBIP - [IKIP_HUMAN]</a>    | 2,03   | 0,00 |
| Q9HBA0-4 | <a href="#">Isoform 4 of Transient receptor potential cation channel subfamily V member 4 OS=Homo sapiens GN=TRPV4 - [TRPV4_HUMAN]</a> | 2,69   | 0,00 |
| P98155-2 | <a href="#">Isoform Short of Very low-density lipoprotein receptor OS=Homo sapiens GN=VLDLR - [VLDLR_HUMAN]</a>                        | 3,16   | 0,00 |
| P08581   | <a href="#">Hepatocyte growth factor receptor OS=Homo sapiens GN=MET PE=1 SV=4 - [MET_HUMAN]</a>                                       | 2,12   | 0,00 |
| P35914   | <a href="#">Hydroxymethylglutaryl-CoA lyase, mitochondrial OS=Homo sapiens GN=HMGCL PE=1 SV=2 - [HMGCL_HUMAN]</a>                      | 2,77   | 0,00 |
| Q86SJ2   | <a href="#">Amphotericin-induced protein 2 OS=Homo sapiens GN=AMIGO2 PE=1 SV=1 - [AMIGO2_HUMAN]</a>                                    | 2,10   | 0,00 |
| Q6P5R6   | <a href="#">60S ribosomal protein L22-like 1 OS=Homo sapiens GN=RPL22L1 PE=1 SV=2 - [RL22L_HUMAN]</a>                                  | 3,22   | 0,00 |
| Q8IX05   | <a href="#">CD302 antigen OS=Homo sapiens GN=CD302 PE=1 SV=1 - [CD302_HUMAN]</a>                                                       | 2,15   | 0,00 |
| Q7Z698   | <a href="#">Sprouty-related, EVH1 domain-containing protein 2 OS=Homo sapiens GN=SPRED2 PE=1 SV=2 - [SPRED2_HUMAN]</a>                 | 1,73   | 0,00 |
| P10301   | <a href="#">Ras-related protein R-Ras OS=Homo sapiens GN=RRAS PE=1 SV=1 - [RRAS_HUMAN]</a>                                             | 1,72   | 0,00 |
| Q5FBB7-6 | <a href="#">Isoform 6 of Shugoshin-like 1 OS=Homo sapiens GN=SGOL1 - [SGOL1_HUMAN]</a>                                                 | 1,71   | 0,00 |
| Q969S9-2 | <a href="#">Isoform 2 of Ribosome-releasing factor 2, mitochondrial OS=Homo sapiens GN=GFM2 - [RRF2M_HUMAN]</a>                        | 1,85   | 0,00 |
| P17936   | <a href="#">Insulin-like growth factor-binding protein 3 OS=Homo sapiens GN=IGFBP3 PE=1 SV=2 - [IBP3_HUMAN]</a>                        | 2,95   | 0,00 |
| Q6ZMK1-2 | <a href="#">Isoform 2 of Cysteine and histidine-rich protein 1 OS=Homo sapiens GN=CYHR1 - [CYHR1_HUMAN]</a>                            | 2,54   | 0,00 |
| Q04941   | <a href="#">Proteolipid protein 2 OS=Homo sapiens GN=PLP2 PE=1 SV=1 - [PLP2_HUMAN]</a>                                                 | 1,79   | 0,00 |
| Q6IC98   | <a href="#">GRAM domain-containing protein 4 OS=Homo sapiens GN=GRAMD4 PE=1 SV=1 - [GRAM4_HUMAN]</a>                                   | 2,23   | 0,00 |
| P27701   | <a href="#">CD82 antigen OS=Homo sapiens GN=CD82 PE=1 SV=1 - [CD82_HUMAN]</a>                                                          | 3,64   | 0,00 |
| O15460   | <a href="#">Prolyl 4-hydroxylase subunit alpha-2 OS=Homo sapiens GN=P4HA2 PE=1 SV=1 - [P4HA2_HUMAN]</a>                                | 3,78   | 0,00 |
| Q9NWU1   | <a href="#">3-oxoacyl-[acyl-carrier-protein] synthase, mitochondrial OS=Homo sapiens GN=OXSM PE=1 SV=1 - [OXSM_HUMAN]</a>              | 1,92   | 0,00 |
| Q96BS2   | <a href="#">Tescalcin OS=Homo sapiens GN=TESC PE=1 SV=3 - [TESC_HUMAN]</a>                                                             | 2,69   | 0,00 |
| P14373-2 | <a href="#">Isoform Beta of Zinc finger protein RFP OS=Homo sapiens GN=TRIM27 - [TRI27_HUMAN]</a>                                      | 2,00   | 0,00 |
| O15240   | <a href="#">Neurosecretory protein VGF OS=Homo sapiens GN=VGF PE=1 SV=2 - [VGF_HUMAN]</a>                                              | 314,21 | 0,00 |
| Q96B96   | <a href="#">Promethin OS=Homo sapiens GN=TMEM159 PE=2 SV=2 - [TM159_HUMAN]</a>                                                         | 1,68   | 0,00 |
| O00562-2 | <a href="#">Isoform 2 of Membrane-associated phosphatidylinositol transfer protein 1 OS=Homo sapiens GN=PITPM1 - [PITPM1_HUMAN]</a>    | 2,44   | 0,00 |
| Q9BXJ8-2 | <a href="#">Isoform 2 of Transmembrane protein 120A OS=Homo sapiens GN=TMEM120A - [T120A_HUMAN]</a>                                    | 1,76   | 0,00 |
| P08174   | <a href="#">Complement decay-accelerating factor OS=Homo sapiens GN=CD55 PE=1 SV=4 - [DAF_HUMAN]</a>                                   | 2,06   | 0,00 |

## A375 vs. A375PR1

|          |                                                                                                                                        |      |      |
|----------|----------------------------------------------------------------------------------------------------------------------------------------|------|------|
| Q53R41-2 | <a href="#">Isoform 2 of FAST kinase domain-containing protein 1 OS=Homo sapiens GN=FASTKD1 - [FAKD1 HUMAN]</a>                        | 2,50 | 0,00 |
| O14880   | <a href="#">Microsomal glutathione S-transferase 3 OS=Homo sapiens GN=MGST3 PE=1 SV=1 - [MGST3 HUMAN]</a>                              | 2,41 | 0,00 |
| Q8WZA1   | <a href="#">Protein O-linked-mannose beta-1,2-N-acetylglucosaminyltransferase 1 OS=Homo sapiens GN=POMGNT1 PE=1 SV=2</a>               | 1,76 | 0,00 |
| Q9UQ03-2 | <a href="#">Isoform 2 of Coronin-2B OS=Homo sapiens GN=CORO2B - [COR2B HUMAN]</a>                                                      | 2,24 | 0,00 |
| Q9BZC7-2 | <a href="#">Isoform 2 of ATP-binding cassette sub-family A member 2 OS=Homo sapiens GN=ABCA2 - [ABCA2 HUMAN]</a>                       | 1,90 | 0,00 |
| Q9UHQ9   | <a href="#">NADH-cytochrome b5 reductase 1 OS=Homo sapiens GN=CYB5R1 PE=1 SV=1 - [NB5R1 HUMAN]</a>                                     | 1,90 | 0,00 |
| Q96N66-3 | <a href="#">Isoform 3 of Lysophospholipid acyltransferase 7 OS=Homo sapiens GN=MBOAT7 - [MBOA7 HUMAN]</a>                              | 2,17 | 0,00 |
| Q7L311   | <a href="#">Armadillo repeat-containing X-linked protein 2 OS=Homo sapiens GN=ARMCX2 PE=2 SV=1 - [ARMX2 HUMAN]</a>                     | 1,75 | 0,00 |
| Q8IWB1   | <a href="#">Inositol 1,4,5-triphosphate receptor-interacting protein OS=Homo sapiens GN=ITPRIP PE=1 SV=1 - [IPRI HUMAN]</a>            | 2,49 | 0,00 |
| Q9BYC5   | <a href="#">Alpha-(1,6)-fucosyltransferase OS=Homo sapiens GN=FUT8 PE=1 SV=2 - [FUT8 HUMAN]</a>                                        | 1,94 | 0,00 |
| P55268   | <a href="#">Laminin subunit beta-2 OS=Homo sapiens GN=LAMB2 PE=1 SV=2 - [LAMB2 HUMAN]</a>                                              | 2,47 | 0,00 |
| Q8N474   | <a href="#">Secreted frizzled-related protein 1 OS=Homo sapiens GN=SFRP1 PE=1 SV=1 - [SFRP1 HUMAN]</a>                                 | 1,80 | 0,00 |
| Q8WUJ3-2 | <a href="#">Isoform 2 of Protein KIAA1199 OS=Homo sapiens GN=KIAA1199 - [K1199 HUMAN]</a>                                              | 3,26 | 0,00 |
| Q9NWQ8   | <a href="#">Phosphoprotein associated with glycosphingolipid-enriched microdomains 1 OS=Homo sapiens GN=PAG1 PE=1 SV=1</a>             | 1,86 | 0,00 |
| P07858   | <a href="#">Cathepsin B OS=Homo sapiens GN=CTSB PE=1 SV=3 - [CATB HUMAN]</a>                                                           | 2,23 | 0,00 |
| P58335-4 | <a href="#">Isoform 4 of Anthrax toxin receptor 2 OS=Homo sapiens GN=ANTXR2 - [ANTR2 HUMAN]</a>                                        | 1,84 | 0,00 |
| Q16394   | <a href="#">Exostosin-1 OS=Homo sapiens GN=EXT1 PE=1 SV=2 - [EXT1 HUMAN]</a>                                                           | 2,10 | 0,00 |
| P01130   | <a href="#">Low-density lipoprotein receptor OS=Homo sapiens GN=LDLR PE=1 SV=1 - [LDLR HUMAN]</a>                                      | 1,91 | 0,00 |
| Q3T906   | <a href="#">N-acetylglucosamine-1-phosphotransferase subunits alpha/beta OS=Homo sapiens GN=GNPTAB PE=1 SV=1 - [GNPTA HUMAN]</a>       | 2,04 | 0,00 |
| Q07065   | <a href="#">Cytoskeleton-associated protein 4 OS=Homo sapiens GN=CKAP4 PE=1 SV=2 - [CKAP4 HUMAN]</a>                                   | 1,81 | 0,00 |
| Q86WA9   | <a href="#">Sodium-independent sulfate anion transporter OS=Homo sapiens GN=SLC26A11 PE=1 SV=2 - [S2611 HUMAN]</a>                     | 1,98 | 0,00 |
| P55084   | <a href="#">Trifunctional enzyme subunit beta, mitochondrial OS=Homo sapiens GN=HADHB PE=1 SV=3 - [ECHB HUMAN]</a>                     | 1,87 | 0,00 |
| O00469-2 | <a href="#">Isoform 2 of Procollagen-lysine,2-oxoglutarate 5-dioxygenase 2 OS=Homo sapiens GN=PLOD2 - [PLOD2 HUMAN]</a>                | 2,56 | 0,00 |
| P27144   | <a href="#">Adenylate kinase isoenzyme 4, mitochondrial OS=Homo sapiens GN=AK4 PE=1 SV=1 - [KAD4 HUMAN]</a>                            | 1,92 | 0,00 |
| P23786   | <a href="#">Carnitine O-palmitoyltransferase 2, mitochondrial OS=Homo sapiens GN=CPT2 PE=1 SV=2 - [CPT2 HUMAN]</a>                     | 1,80 | 0,00 |
| Q8N4T8-2 | <a href="#">Isoform 2 of Carbonyl reductase family member 4 OS=Homo sapiens GN=CBR4 - [CBR4 HUMAN]</a>                                 | 1,87 | 0,00 |
| O14735   | <a href="#">CDP-diacylglycerol--inositol 3-phosphatidyltransferase OS=Homo sapiens GN=CDIPT PE=1 SV=1 - [CDIPT HUMAN]</a>              | 1,70 | 0,00 |
| Q5RI15   | <a href="#">Protein FAM36A OS=Homo sapiens GN=FAM36A PE=1 SV=2 - [FA36A HUMAN]</a>                                                     | 1,67 | 0,00 |
| O95870   | <a href="#">Abhydrolase domain-containing protein 16A OS=Homo sapiens GN=ABHD16A PE=1 SV=3 - [ABHGA HUMAN]</a>                         | 1,75 | 0,00 |
| P43121   | <a href="#">Cell surface glycoprotein MUC18 OS=Homo sapiens GN=MCAM PE=1 SV=2 - [MUC18 HUMAN]</a>                                      | 1,92 | 0,00 |
| Q96D53   | <a href="#">Uncharacterized aarF domain-containing protein kinase 4 OS=Homo sapiens GN=ADCK4 PE=1 SV=2 - [ADCK4 HUMAN]</a>             | 1,75 | 0,00 |
| P43362   | <a href="#">Melanoma-associated antigen 9 OS=Homo sapiens GN=MAGEA9 PE=2 SV=1 - [MAGA9 HUMAN]</a>                                      | 1,84 | 0,00 |
| Q8TD43-2 | <a href="#">Isoform 2 of Transient receptor potential cation channel subfamily M member 4 OS=Homo sapiens GN=TRPM4 - [TRPM4 HUMAN]</a> | 1,94 | 0,00 |

## A375 vs. A375PR1

|          |                                                                                                                                                                                   |      |      |
|----------|-----------------------------------------------------------------------------------------------------------------------------------------------------------------------------------|------|------|
| Q16363-2 | <a href="#">Isoform 2 of Laminin subunit alpha-4 OS=Homo sapiens GN=LAMA4 - [LAMA4 HUMAN]</a>                                                                                     | 2,24 | 0,00 |
| Q9BZG1   | <a href="#">Ras-related protein Rab-34 OS=Homo sapiens GN=RAB34 PE=1 SV=1 - [RAB34 HUMAN]</a>                                                                                     | 1,79 | 0,00 |
| Q6NXT6   | <a href="#">Transmembrane anterior posterior transformation protein 1 homolog OS=Homo sapiens GN=TAPT1 PE=1 SV=1 - [TAPT1 HUMAN]</a>                                              | 2,14 | 0,00 |
| O95573   | <a href="#">Long-chain-fatty-acid--CoA ligase 3 OS=Homo sapiens GN=ACSL3 PE=1 SV=3 - [ACSL3 HUMAN]</a>                                                                            | 2,13 | 0,00 |
| P06858   | <a href="#">Lipoprotein lipase OS=Homo sapiens GN=LPL PE=1 SV=1 - [LPL HUMAN]</a>                                                                                                 | 2,30 | 0,00 |
| Q96AQ8   | <a href="#">Coiled-coil domain-containing protein 90A, mitochondrial OS=Homo sapiens GN=CCDC90A PE=2 SV=1 - [CC90A HUMAN]</a>                                                     | 1,88 | 0,00 |
| Q15526-2 | <a href="#">Isoform 2 of Surfeit locus protein 1 OS=Homo sapiens GN=SURF1 - [SURF1 HUMAN]</a>                                                                                     | 1,89 | 0,00 |
| P23368   | <a href="#">NAD-dependent malic enzyme, mitochondrial OS=Homo sapiens GN=ME2 PE=1 SV=1 - [MAOM HUMAN]</a>                                                                         | 1,97 | 0,00 |
| O95571   | <a href="#">Protein ETHE1, mitochondrial OS=Homo sapiens GN=ETHE1 PE=1 SV=2 - [ETHE1 HUMAN]</a>                                                                                   | 1,86 | 0,00 |
| Q9BXT8-2 | <a href="#">Isoform 3 of RING finger protein 17 OS=Homo sapiens GN=RNF17 - [RNF17 HUMAN]</a>                                                                                      | 1,97 | 0,00 |
| P42126-2 | <a href="#">Isoform 2 of Enoyl-CoA delta isomerase 1, mitochondrial OS=Homo sapiens GN=ECI1 - [ECI1 HUMAN]</a>                                                                    | 1,89 | 0,00 |
| Q13427   | <a href="#">Peptidyl-prolyl cis-trans isomerase G OS=Homo sapiens GN=PPIG PE=1 SV=2 - [PPIG HUMAN]</a>                                                                            | 1,81 | 0,00 |
| Q6STE5-2 | <a href="#">Isoform 2 of SWI/SNF-related matrix-associated actin-dependent regulator of chromatin subfamily D member 3 OS=Homo sapiens GN=SMARCD3 PE=1 SV=1 - [SMARCD3 HUMAN]</a> | 1,86 | 0,00 |
| Q02978   | <a href="#">Mitochondrial 2-oxoglutarate/malate carrier protein OS=Homo sapiens GN=SLC25A11 PE=1 SV=3 - [M2OM HUMAN]</a>                                                          | 2,07 | 0,00 |
| Q86UE4   | <a href="#">Protein LYRIC OS=Homo sapiens GN=MTDH PE=1 SV=2 - [LYRIC HUMAN]</a>                                                                                                   | 1,82 | 0,00 |
| Q9P2E5-2 | <a href="#">Isoform 2 of Chondroitin sulfate glucuronyltransferase OS=Homo sapiens GN=CHPF2 - [CHPF2 HUMAN]</a>                                                                   | 1,75 | 0,00 |
| Q96C36   | <a href="#">Pyrroline-5-carboxylate reductase 2 OS=Homo sapiens GN=PYCR2 PE=1 SV=1 - [P5CR2 HUMAN]</a>                                                                            | 2,02 | 0,00 |
| Q8NBQ5   | <a href="#">Estradiol 17-beta-dehydrogenase 11 OS=Homo sapiens GN=HSD17B11 PE=1 SV=3 - [DHB11 HUMAN]</a>                                                                          | 1,77 | 0,00 |
| P26006   | <a href="#">Integrin alpha-3 OS=Homo sapiens GN=ITGA3 PE=1 SV=5 - [ITA3 HUMAN]</a>                                                                                                | 2,17 | 0,00 |
| Q9BU23-3 | <a href="#">Isoform 3 of Lipase maturation factor 2 OS=Homo sapiens GN=LMF2 - [LMF2 HUMAN]</a>                                                                                    | 1,63 | 0,00 |
| Q13393-4 | <a href="#">Isoform PLD1D of Phospholipase D1 OS=Homo sapiens GN=PLD1 - [PLD1 HUMAN]</a>                                                                                          | 1,94 | 0,00 |
| Q9UH62   | <a href="#">Armadillo repeat-containing X-linked protein 3 OS=Homo sapiens GN=ARMCX3 PE=1 SV=1 - [ARMX3 HUMAN]</a>                                                                | 1,84 | 0,00 |
| Q13586   | <a href="#">Stromal interaction molecule 1 OS=Homo sapiens GN=STIM1 PE=1 SV=3 - [STIM1 HUMAN]</a>                                                                                 | 1,63 | 0,00 |
| P61020   | <a href="#">Ras-related protein Rab-5B OS=Homo sapiens GN=RAB5B PE=1 SV=1 - [RAB5B HUMAN]</a>                                                                                     | 1,81 | 0,00 |
| Q92805   | <a href="#">Golgin subfamily A member 1 OS=Homo sapiens GN=GOLGA1 PE=1 SV=3 - [GOGA1 HUMAN]</a>                                                                                   | 1,81 | 0,00 |
| Q9UDX5   | <a href="#">Mitochondrial fission process protein 1 OS=Homo sapiens GN=MTFP1 PE=1 SV=1 - [MTFP1 HUMAN]</a>                                                                        | 1,74 | 0,00 |
| Q14573   | <a href="#">Inositol 1,4,5-trisphosphate receptor type 3 OS=Homo sapiens GN=ITPR3 PE=1 SV=2 - [ITPR3 HUMAN]</a>                                                                   | 1,80 | 0,00 |
| Q8NBX0   | <a href="#">Saccharopine dehydrogenase-like oxidoreductase OS=Homo sapiens GN=SCCPDH PE=1 SV=1 - [SCPDL HUMAN]</a>                                                                | 1,61 | 0,00 |
| Q15149-5 | <a href="#">Isoform 5 of Plectin OS=Homo sapiens GN=PLEC - [PLEC HUMAN]</a>                                                                                                       | 2,82 | 0,00 |
| P14927   | <a href="#">Cytochrome b-c1 complex subunit 7 OS=Homo sapiens GN=UQCRB PE=1 SV=2 - [QCR7 HUMAN]</a>                                                                               | 1,65 | 0,00 |
| Q8N441   | <a href="#">Fibroblast growth factor receptor-like 1 OS=Homo sapiens GN=FGRL1 PE=1 SV=1 - [FGRL1 HUMAN]</a>                                                                       | 2,08 | 0,00 |
| O75110   | <a href="#">Probable phospholipid-transporting ATPase IIA OS=Homo sapiens GN=ATP9A PE=1 SV=3 - [ATP9A HUMAN]</a>                                                                  | 1,77 | 0,00 |
| Q14728   | <a href="#">Major facilitator superfamily domain-containing protein 10 OS=Homo sapiens GN=MFS10 PE=2 SV=1 - [MFS10 HUMAN]</a>                                                     | 1,63 | 0,00 |

## A375 vs. A375PR1

|          |                                                                                                                                   |                |      |
|----------|-----------------------------------------------------------------------------------------------------------------------------------|----------------|------|
| P07093-2 | <a href="#">Isoform 2 of Glia-derived nexin OS=Homo sapiens GN=SERPINE2 - [GDN HUMAN]</a>                                         | 1,63           | 0,00 |
| Q8TCT9-5 | <a href="#">Isoform 5 of Minor histocompatibility antigen H13 OS=Homo sapiens GN=HM13 - [HM13 HUMAN]</a>                          | 1,86           | 0,00 |
| Q9H0X9   | <a href="#">Oxysterol-binding protein-related protein 5 OS=Homo sapiens GN=OSBPL5 PE=1 SV=1 - [OSBL5 HUMAN]</a>                   | 1,63           | 0,00 |
| Q2PZ11-2 | <a href="#">Isoform 2 of Protein dpy-19 homolog 1 OS=Homo sapiens GN=DPY19L1 - [D19L1 HUMAN]</a>                                  | 2,00           | 0,00 |
| Q9HD26-2 | <a href="#">Isoform 2 of Golgi-associated PDZ and coiled-coil motif-containing protein OS=Homo sapiens GN=GOPC - [GOPC HUMAN]</a> | 1,84           | 0,00 |
| Q6P2I3   | <a href="#">Fumarylacetoacetate hydrolase domain-containing protein 2B OS=Homo sapiens GN=FAHD2B PE=1 SV=1 - [FAH2B HUMAN]</a>    | 1,82           | 0,00 |
| Q99541   | <a href="#">Perilipin-2 OS=Homo sapiens GN=PLIN2 PE=1 SV=2 - [PLIN2 HUMAN]</a>                                                    | 1,78           | 0,00 |
| Q2TB10   | <a href="#">Zinc finger protein 800 OS=Homo sapiens GN=ZNF800 PE=1 SV=1 - [ZN800 HUMAN]</a>                                       | 1,73           | 0,00 |
| Q08379   | <a href="#">Golgin subfamily A member 2 OS=Homo sapiens GN=GOLGA2 PE=1 SV=3 - [GOGA2 HUMAN]</a>                                   | 1,70           | 0,00 |
| O60906   | <a href="#">Sphingomyelin phosphodiesterase 2 OS=Homo sapiens GN=SMPD2 PE=1 SV=2 - [NSMA HUMAN]</a>                               | 1,84           | 0,00 |
| O14949   | <a href="#">Cytochrome b-c1 complex subunit 8 OS=Homo sapiens GN=UQCRCQ PE=1 SV=4 - [QCR8 HUMAN]</a>                              | 1,57           | 0,00 |
| Q8IXB1-2 | <a href="#">Isoform 2 of DnaJ homolog subfamily C member 10 OS=Homo sapiens GN=DNAJC10 - [DJC10 HUMAN]</a>                        | 1,65           | 0,00 |
| Q92520   | <a href="#">Protein FAM3C OS=Homo sapiens GN=FAM3C PE=1 SV=1 - [FAM3C HUMAN]</a>                                                  | 1,78           | 0,00 |
| O43824   | <a href="#">Putative GTP-binding protein 6 OS=Homo sapiens GN=GTPBP6 PE=2 SV=3 - [GTPB6 HUMAN]</a>                                | 2,38           | 0,00 |
| Q08174-2 | <a href="#">Isoform 2 of Protocadherin-1 OS=Homo sapiens GN=PCDH1 - [PCDH1 HUMAN]</a>                                             | 1,71           | 0,00 |
| Q8IZV5   | <a href="#">Retinol dehydrogenase 10 OS=Homo sapiens GN=RDH10 PE=1 SV=1 - [RDH10 HUMAN]</a>                                       | 1,79           | 0,00 |
| Q8IXT5   | <a href="#">RNA-binding protein 12B OS=Homo sapiens GN=RBM12B PE=1 SV=2 - [RB12B HUMAN]</a>                                       | 1,70           | 0,00 |
| Q9BVA6   | <a href="#">Adenosine monophosphate-protein transferase FICD OS=Homo sapiens GN=FICD PE=1 SV=2 - [FICD HUMAN]</a>                 | 1,88           | 0,00 |
| P07711   | <a href="#">Cathepsin L1 OS=Homo sapiens GN=CTSL1 PE=1 SV=2 - [CATL1 HUMAN]</a>                                                   | 2,14           | 0,00 |
| Q9Y3B3   | <a href="#">Transmembrane emp24 domain-containing protein 7 OS=Homo sapiens GN=TMED7 PE=1 SV=2 - [TMED7 HUMAN]</a>                | 1,62           | 0,00 |
| Q14993   | <a href="#">Collagen alpha-1(XIX) chain OS=Homo sapiens GN=COL19A1 PE=1 SV=3 - [COJA1 HUMAN]</a>                                  | 2,26           | 0,00 |
| Q96ND0   | <a href="#">Protein FAM210A OS=Homo sapiens GN=FAM210A PE=2 SV=2 - [F210A HUMAN]</a>                                              | 1,80           | 0,00 |
| Q9UPA5   | <a href="#">Protein bassoon OS=Homo sapiens GN=BSN PE=1 SV=4 - [BSN HUMAN]</a>                                                    | 70500608897,67 | 0,00 |
| Q6PKC3-2 | <a href="#">Isoform 2 of Thioredoxin domain-containing protein 11 OS=Homo sapiens GN=TXNDC11 - [TXD11 HUMAN]</a>                  | 1,61           | 0,00 |
| P48723   | <a href="#">Heat shock 70 kDa protein 13 OS=Homo sapiens GN=HSPA13 PE=1 SV=1 - [HSP13 HUMAN]</a>                                  | 1,86           | 0,00 |
| Q9NR19   | <a href="#">Acetyl-coenzyme A synthetase, cytoplasmic OS=Homo sapiens GN=ACSS2 PE=1 SV=1 - [ACSA HUMAN]</a>                       | 2,25           | 0,00 |
| P84157-2 | <a href="#">Isoform 2 of Matrix-remodeling-associated protein 7 OS=Homo sapiens GN=MXRA7 - [MXRA7 HUMAN]</a>                      | 1,69           | 0,00 |
| Q9UMF0   | <a href="#">Intercellular adhesion molecule 5 OS=Homo sapiens GN=ICAM5 PE=1 SV=3 - [ICAM5 HUMAN]</a>                              | 1,90           | 0,00 |
| P05091   | <a href="#">Aldehyde dehydrogenase, mitochondrial OS=Homo sapiens GN=ALDH2 PE=1 SV=2 - [ALDH2 HUMAN]</a>                          | 1,73           | 0,00 |
| Q8WY21-3 | <a href="#">Isoform 3 of VPS10 domain-containing receptor SorCS1 OS=Homo sapiens GN=SORCS1 - [SORC1 HUMAN]</a>                    | 2,38           | 0,00 |
| O00154-6 | <a href="#">Isoform 6 of Cytosolic acyl coenzyme A thioester hydrolase OS=Homo sapiens GN=ACOT7 - [BACH HUMAN]</a>                | 1,80           | 0,00 |
| O43166-2 | <a href="#">Isoform 2 of Signal-induced proliferation-associated 1-like protein 1 OS=Homo sapiens GN=SIPA1L1 - [S11L1 HUMAN]</a>  | 1,86           | 0,00 |
| Q9Y653-2 | <a href="#">Isoform 2 of G-protein coupled receptor 56 OS=Homo sapiens GN=GPR56 - [GPR56 HUMAN]</a>                               | 3,17           | 0,00 |

## A375 vs. A375PR1

|          |                                                                                                                               |                  |      |
|----------|-------------------------------------------------------------------------------------------------------------------------------|------------------|------|
| Q5TF58   | <a href="#">Intermediate filament family orphan 2 OS=Homo sapiens GN=IFFO2 PE=2 SV=3 - [IFFO2 HUMAN]</a>                      | 1,61             | 0,00 |
| P41219   | <a href="#">Peripherin OS=Homo sapiens GN=PRPH PE=1 SV=2 - [PERI HUMAN]</a>                                                   | 1960125726426,86 | 0,00 |
| Q9HBL7   | <a href="#">Transmembrane protein C9orf46 OS=Homo sapiens GN=C9orf46 PE=2 SV=1 - [CI046 HUMAN]</a>                            | 1,63             | 0,00 |
| P04156-2 | <a href="#">Isoform 2 of Major prion protein OS=Homo sapiens GN=PRNP - [PRIO HUMAN]</a>                                       | 1,60             | 0,00 |
| P28290-2 | <a href="#">Isoform 2 of Sperm-specific antigen 2 OS=Homo sapiens GN=SSFA2 - [SSFA2 HUMAN]</a>                                | 1,72             | 0,00 |
| P62760   | <a href="#">Visinin-like protein 1 OS=Homo sapiens GN=VSNL1 PE=1 SV=2 - [VISL1 HUMAN]</a>                                     | 2,36             | 0,00 |
| Q9NZV5-2 | <a href="#">Isoform 2 of Selenoprotein N OS=Homo sapiens GN=SEPN1 - [SELN HUMAN]</a>                                          | 1,59             | 0,00 |
| Q8N0V3   | <a href="#">Putative ribosome-binding factor A, mitochondrial OS=Homo sapiens GN=RBFA PE=1 SV=3 - [RBFA HUMAN]</a>            | 1,72             | 0,00 |
| P19256-2 | <a href="#">Isoform 2 of Lymphocyte function-associated antigen 3 OS=Homo sapiens GN=CD58 - [LFA3 HUMAN]</a>                  | 1,56             | 0,00 |
| Q9NUJ1   | <a href="#">Abhydrolase domain-containing protein 10, mitochondrial OS=Homo sapiens GN=ABHD10 PE=1 SV=1 - [ABHDA HU]</a>      | 1,98             | 0,00 |
| P22033   | <a href="#">Methylmalonyl-CoA mutase, mitochondrial OS=Homo sapiens GN=MUT PE=1 SV=4 - [MUTA HUMAN]</a>                       | 1,80             | 0,00 |
| Q8N9Z2   | <a href="#">Uncharacterized protein C7orf74 OS=Homo sapiens GN=C7orf74 PE=2 SV=2 - [CG074 HUMAN]</a>                          | 1,64             | 0,00 |
| Q9BTZ2-5 | <a href="#">Isoform 5 of Dehydrogenase/reductase SDR family member 4 OS=Homo sapiens GN=DHRS4 - [DHRS4 HUMAN]</a>             | 1,89             | 0,00 |
| Q8N8U2   | <a href="#">Chromodomain Y-like protein 2 OS=Homo sapiens GN=CDYL2 PE=2 SV=2 - [CDYL2 HUMAN]</a>                              | 2,09             | 0,00 |
| Q9UHG3   | <a href="#">Prenylcysteine oxidase 1 OS=Homo sapiens GN=PCYOX1 PE=1 SV=3 - [PCYOX HUMAN]</a>                                  | 1,83             | 0,00 |
| Q9Y5J7   | <a href="#">Mitochondrial import inner membrane translocase subunit Tim9 OS=Homo sapiens GN=TIMM9 PE=1 SV=1 - [TIM9]</a>      | 1,70             | 0,00 |
| Q9C0E8-2 | <a href="#">Isoform 2 of Protein lunapark OS=Homo sapiens GN=LNP - [LNP HUMAN]</a>                                            | 1,70             | 0,00 |
| P40939   | <a href="#">Trifunctional enzyme subunit alpha, mitochondrial OS=Homo sapiens GN=HADHA PE=1 SV=2 - [ECHA HUMAN]</a>           | 1,66             | 0,00 |
| Q8IYQ7   | <a href="#">Threonine synthase-like 1 OS=Homo sapiens GN=THNSL1 PE=1 SV=2 - [THNS1 HUMAN]</a>                                 | 1,59             | 0,00 |
| Q5HYI7   | <a href="#">Metaxin-3 OS=Homo sapiens GN=MTX3 PE=1 SV=2 - [MTX3 HUMAN]</a>                                                    | 1,60             | 0,00 |
| Q9Y4K0   | <a href="#">Lysyl oxidase homolog 2 OS=Homo sapiens GN=LOXL2 PE=1 SV=1 - [LOXL2 HUMAN]</a>                                    | 1,79             | 0,00 |
| Q02252   | <a href="#">Methylmalonate-semialdehyde dehydrogenase [acylating], mitochondrial OS=Homo sapiens GN=ALDH6A1 PE=1 SV</a>       | 2,46             | 0,00 |
| Q9NQE9   | <a href="#">Histidine triad nucleotide-binding protein 3 OS=Homo sapiens GN=HINT3 PE=1 SV=1 - [HINT3 HUMAN]</a>               | 1,57             | 0,00 |
| P53007   | <a href="#">Tricarboxylate transport protein, mitochondrial OS=Homo sapiens GN=SLC25A1 PE=1 SV=2 - [TXTP HUMAN]</a>           | 1,57             | 0,00 |
| Q68DH5   | <a href="#">LMBR1 domain-containing protein 2 OS=Homo sapiens GN=LMBRD2 PE=1 SV=1 - [LMBD2 HUMAN]</a>                         | 1,60             | 0,00 |
| Q9BZ76   | <a href="#">Contactin-associated protein-like 3 OS=Homo sapiens GN=CNTNAP3 PE=2 SV=3 - [CNTP3 HUMAN]</a>                      | 1,59             | 0,00 |
| Q58EX7-2 | <a href="#">Isoform 2 of Puratrophin-1 OS=Homo sapiens GN=PLEKHG4 - [PKHG4 HUMAN]</a>                                         | 1,90             | 0,00 |
| Q96RQ3   | <a href="#">Methylcrotonoyl-CoA carboxylase subunit alpha, mitochondrial OS=Homo sapiens GN=MCCC1 PE=1 SV=3 - [MCCA]</a>      | 1,92             | 0,00 |
| Q9BUR5-2 | <a href="#">Isoform 2 of Apolipoprotein O OS=Homo sapiens GN=APOO - [APOO HUMAN]</a>                                          | 1,61             | 0,00 |
| Q9BVV7   | <a href="#">Mitochondrial import inner membrane translocase subunit Tim21 OS=Homo sapiens GN=TIMM21 PE=1 SV=1 - [TIM]</a>     | 1,56             | 0,00 |
| O43293   | <a href="#">Death-associated protein kinase 3 OS=Homo sapiens GN=DAPK3 PE=1 SV=1 - [DAPK3 HUMAN]</a>                          | 1,65             | 0,00 |
| Q8N4A0   | <a href="#">Polypeptide N-acetylgalactosaminyltransferase 4 OS=Homo sapiens GN=GALNT4 PE=1 SV=2 - [GALT4 HUMAN]</a>           | 1,83             | 0,00 |
| Q15011-3 | <a href="#">Isoform 3 of Homocysteine-responsive endoplasmic reticulum-resident ubiquitin-like domain member 1 protein OS</a> | 1,59             | 0,00 |

## A375 vs. A375PR1

|          |                                                                                                                                          |      |      |
|----------|------------------------------------------------------------------------------------------------------------------------------------------|------|------|
| Q8N2G8   | <a href="#">GH3 domain-containing protein OS=Homo sapiens GN=GHDC PE=1 SV=2 - [GHDC HUMAN]</a>                                           | 1,46 | 0,00 |
| Q15392   | <a href="#">Delta(24)-sterol reductase OS=Homo sapiens GN=DHCR24 PE=1 SV=2 - [DHC24 HUMAN]</a>                                           | 2,31 | 0,00 |
| Q86VU5   | <a href="#">Catechol O-methyltransferase domain-containing protein 1 OS=Homo sapiens GN=COMTD1 PE=1 SV=1 - [CMTD1 HUMAN]</a>             | 1,67 | 0,00 |
| P08574   | <a href="#">Cytochrome c1, heme protein, mitochondrial OS=Homo sapiens GN=CYC1 PE=1 SV=3 - [CY1 HUMAN]</a>                               | 1,78 | 0,00 |
| P50336   | <a href="#">Protoporphyrinogen oxidase OS=Homo sapiens GN=PPOX PE=1 SV=1 - [PPOX HUMAN]</a>                                              | 1,58 | 0,00 |
| Q15149-6 | <a href="#">Isoform 6 of Plectin OS=Homo sapiens GN=PLEC - [PLEC HUMAN]</a>                                                              | 1,95 | 0,00 |
| Q3SXM5   | <a href="#">Inactive hydroxysteroid dehydrogenase-like protein 1 OS=Homo sapiens GN=HSDL1 PE=1 SV=3 - [HSDL1 HUMAN]</a>                  | 2,11 | 0,00 |
| Q6KCM7-6 | <a href="#">Isoform 6 of Calcium-binding mitochondrial carrier protein SCaMC-2 OS=Homo sapiens GN=SLC25A25 - [SCMC2 HUMAN]</a>           | 1,53 | 0,00 |
| Q9BYT1-2 | <a href="#">Isoform 2 of Solute carrier family 17 member 9 OS=Homo sapiens GN=SLC17A9 - [S17A9 HUMAN]</a>                                | 2,33 | 0,00 |
| Q8TDW0   | <a href="#">Leucine-rich repeat-containing protein 8C OS=Homo sapiens GN=LRR8C PE=1 SV=2 - [LRC8C HUMAN]</a>                             | 1,84 | 0,00 |
| O00258   | <a href="#">Tail-anchored protein insertion receptor WRB OS=Homo sapiens GN=WRB PE=1 SV=2 - [WRB HUMAN]</a>                              | 1,69 | 0,00 |
| O94901   | <a href="#">SUN domain-containing protein 1 OS=Homo sapiens GN=SUN1 PE=1 SV=3 - [SUN1 HUMAN]</a>                                         | 1,65 | 0,00 |
| Q8IWA4   | <a href="#">Mitofusin-1 OS=Homo sapiens GN=MFN1 PE=1 SV=2 - [MFN1 HUMAN]</a>                                                             | 1,54 | 0,00 |
| P02545-3 | <a href="#">Isoform ADelta10 of Prelamin-A/C OS=Homo sapiens GN=LMNA - [LMNA HUMAN]</a>                                                  | 1,66 | 0,00 |
| Q71RG4-3 | <a href="#">Isoform 3 of Transmembrane and ubiquitin-like domain-containing protein 2 OS=Homo sapiens GN=TMUB2 - [TMUB2 HUMAN]</a>       | 1,70 | 0,00 |
| Q9NVH6-2 | <a href="#">Isoform B of Trimethyllysine dioxygenase, mitochondrial OS=Homo sapiens GN=TMLHE - [TMLH HUMAN]</a>                          | 1,71 | 0,00 |
| P09471-2 | <a href="#">Isoform Alpha-2 of Guanine nucleotide-binding protein G(o) subunit alpha OS=Homo sapiens GN=GNAO1 - [GNAO1 HUMAN]</a>        | 1,61 | 0,00 |
| Q9ULX9   | <a href="#">Transcription factor MafF OS=Homo sapiens GN=MAFF PE=1 SV=2 - [MAFF HUMAN]</a>                                               | 1,52 | 0,00 |
| Q8WW59   | <a href="#">SPRY domain-containing protein 4 OS=Homo sapiens GN=SPRY4 PE=1 SV=2 - [SPRY4 HUMAN]</a>                                      | 1,68 | 0,00 |
| P20340   | <a href="#">Ras-related protein Rab-6A OS=Homo sapiens GN=RAB6A PE=1 SV=3 - [RAB6A HUMAN]</a>                                            | 1,62 | 0,00 |
| Q8IVL5   | <a href="#">Prolyl 3-hydroxylase 2 OS=Homo sapiens GN=LEPREL1 PE=1 SV=1 - [P3H2 HUMAN]</a>                                               | 1,66 | 0,00 |
| Q53EP0   | <a href="#">Fibronectin type III domain-containing protein 3B OS=Homo sapiens GN=FND3B PE=1 SV=2 - [FND3B HUMAN]</a>                     | 1,66 | 0,00 |
| O94905   | <a href="#">Erlin-2 OS=Homo sapiens GN=ERLIN2 PE=1 SV=1 - [ERLIN2 HUMAN]</a>                                                             | 1,55 | 0,00 |
| P48681   | <a href="#">Nestin OS=Homo sapiens GN=NES PE=1 SV=2 - [NEST HUMAN]</a>                                                                   | 1,64 | 0,00 |
| Q9NRX5   | <a href="#">Serine incorporator 1 OS=Homo sapiens GN=SERINC1 PE=1 SV=1 - [SERC1 HUMAN]</a>                                               | 1,45 | 0,00 |
| P37275   | <a href="#">Zinc finger E-box-binding homeobox 1 OS=Homo sapiens GN=ZEB1 PE=1 SV=2 - [ZEB1 HUMAN]</a>                                    | 1,65 | 0,00 |
| P11117   | <a href="#">Lysosomal acid phosphatase OS=Homo sapiens GN=ACP2 PE=1 SV=3 - [PPAL HUMAN]</a>                                              | 1,52 | 0,00 |
| Q14807   | <a href="#">Kinesin-like protein KIF22 OS=Homo sapiens GN=KIF22 PE=1 SV=5 - [KIF22 HUMAN]</a>                                            | 1,54 | 0,00 |
| P49590   | <a href="#">Probable histidine--tRNA ligase, mitochondrial OS=Homo sapiens GN=HARS2 PE=1 SV=1 - [SYHM HUMAN]</a>                         | 1,68 | 0,00 |
| O94766   | <a href="#">Galactosylgalactosylxylosylprotein 3-beta-glucuronosyltransferase 3 OS=Homo sapiens GN=B3GAT3 PE=1 SV=2 - [B3GAT3 HUMAN]</a> | 1,59 | 0,00 |
| Q9H0V1   | <a href="#">Transmembrane protein 168 OS=Homo sapiens GN=TMEM168 PE=1 SV=2 - [TM168 HUMAN]</a>                                           | 1,46 | 0,00 |
| P18084   | <a href="#">Integrin beta-5 OS=Homo sapiens GN=ITGB5 PE=1 SV=1 - [ITB5 HUMAN]</a>                                                        | 1,76 | 0,00 |
| P13674   | <a href="#">Prolyl 4-hydroxylase subunit alpha-1 OS=Homo sapiens GN=P4HA1 PE=1 SV=2 - [P4HA1 HUMAN]</a>                                  | 2,02 | 0,00 |



## A375 vs. A375PR1

|          |                                                                                                                             |      |      |
|----------|-----------------------------------------------------------------------------------------------------------------------------|------|------|
| P61165   | <a href="#">UPF0197 transmembrane protein C11orf10 OS=Homo sapiens GN=C11orf10 PE=1 SV=1 - [CK010 HUMAN]</a>                | 1,64 | 0,00 |
| Q81ZR5-3 | <a href="#">Isoform 3 of CKLF-like MARVEL transmembrane domain-containing protein 4 OS=Homo sapiens GN=CMTM4 - [CKLF</a>    | 1,72 | 0,00 |
| Q9Y6M9   | <a href="#">NADH dehydrogenase [ubiquinone] 1 beta subcomplex subunit 9 OS=Homo sapiens GN=NDUFB9 PE=1 SV=3 - [NDU</a>      | 1,67 | 0,00 |
| Q8N5G0-2 | <a href="#">Isoform 2 of Uncharacterized protein C4orf52 OS=Homo sapiens GN=C4orf52 - [CD052 HUMAN]</a>                     | 1,62 | 0,00 |
| Q7Z388   | <a href="#">Protein dpy-19 homolog 4 OS=Homo sapiens GN=DPY19L4 PE=2 SV=1 - [D19L4 HUMAN]</a>                               | 1,70 | 0,00 |
| Q14764   | <a href="#">Major vault protein OS=Homo sapiens GN=MVP PE=1 SV=4 - [MVP HUMAN]</a>                                          | 1,90 | 0,00 |
| P61019   | <a href="#">Ras-related protein Rab-2A OS=Homo sapiens GN=RAB2A PE=1 SV=1 - [RAB2A HUMAN]</a>                               | 1,62 | 0,00 |
| Q9BSA9   | <a href="#">Transmembrane protein 175 OS=Homo sapiens GN=TMEM175 PE=1 SV=1 - [TM175 HUMAN]</a>                              | 1,79 | 0,00 |
| Q8N2H3   | <a href="#">Pyridine nucleotide-disulfide oxidoreductase domain-containing protein 2 OS=Homo sapiens GN=PYROXD2 PE=2 SV</a> | 2,05 | 0,00 |
| Q8WVC6   | <a href="#">Dephospho-CoA kinase domain-containing protein OS=Homo sapiens GN=DCAKD PE=1 SV=1 - [DCAKD HUMAN]</a>           | 1,66 | 0,00 |
| Q14554   | <a href="#">Protein disulfide-isomerase A5 OS=Homo sapiens GN=PDIA5 PE=1 SV=1 - [PDIA5 HUMAN]</a>                           | 1,80 | 0,00 |
| Q14156-3 | <a href="#">Isoform 3 of Protein EFR3 homolog A OS=Homo sapiens GN=EFR3A - [EFR3A HUMAN]</a>                                | 1,46 | 0,00 |
| A6NJ78   | <a href="#">Probable methyltransferase-like protein 15 OS=Homo sapiens GN=METT15 PE=2 SV=1 - [MET15 HUMAN]</a>              | 1,58 | 0,00 |
| Q6NXT4   | <a href="#">Zinc transporter 6 OS=Homo sapiens GN=SLC30A6 PE=1 SV=2 - [ZNT6 HUMAN]</a>                                      | 1,69 | 0,00 |
| P19438   | <a href="#">Tumor necrosis factor receptor superfamily member 1A OS=Homo sapiens GN=TNFRSF1A PE=1 SV=1 - [TNR1A HUI</a>     | 1,50 | 0,00 |
| Q562F6-2 | <a href="#">Isoform 2 of Shugoshin-like 2 OS=Homo sapiens GN=SGOL2 - [SGOL2 HUMAN]</a>                                      | 2,38 | 0,00 |
| P30084   | <a href="#">Enoyl-CoA hydratase, mitochondrial OS=Homo sapiens GN=ECHS1 PE=1 SV=4 - [ECHM HUMAN]</a>                        | 1,62 | 0,00 |
| Q9Y394-2 | <a href="#">Isoform 2 of Dehydrogenase/reductase SDR family member 7 OS=Homo sapiens GN=DHRS7 - [DHRS7 HUMAN]</a>           | 1,70 | 0,00 |
| Q961R7   | <a href="#">4-hydroxyphenylpyruvate dioxygenase-like protein OS=Homo sapiens GN=HPDL PE=1 SV=1 - [HPDL HUMAN]</a>           | 1,79 | 0,00 |
| Q14534   | <a href="#">Squalene monooxygenase OS=Homo sapiens GN=SQLE PE=2 SV=3 - [ERG1 HUMAN]</a>                                     | 1,55 | 0,00 |
| O14874   | <a href="#">[3-methyl-2-oxobutanoate dehydrogenase [lipoamide]] kinase, mitochondrial OS=Homo sapiens GN=BCKDK PE=1 S</a>   | 1,59 | 0,00 |
| O15554   | <a href="#">Intermediate conductance calcium-activated potassium channel protein 4 OS=Homo sapiens GN=KCNN4 PE=1 SV=1</a>   | 1,61 | 0,00 |
| O75964   | <a href="#">ATP synthase subunit g, mitochondrial OS=Homo sapiens GN=ATP5L PE=1 SV=3 - [ATP5L HUMAN]</a>                    | 1,62 | 0,00 |
| P28331   | <a href="#">NADH-ubiquinone oxidoreductase 75 kDa subunit, mitochondrial OS=Homo sapiens GN=NDUFS1 PE=1 SV=3 - [NDU</a>     | 1,59 | 0,00 |
| P49821-2 | <a href="#">Isoform 2 of NADH dehydrogenase [ubiquinone] flavoprotein 1, mitochondrial OS=Homo sapiens GN=NDUFV1 - [NI</a>  | 1,60 | 0,00 |
| Q86TM6-2 | <a href="#">Isoform 2 of E3 ubiquitin-protein ligase synoviolin OS=Homo sapiens GN=SYVN1 - [SYVN1 HUMAN]</a>                | 1,64 | 0,00 |
| Q4ZIN3-2 | <a href="#">Isoform 2 of Membralin OS=Homo sapiens GN=C19orf6 - [MBRL HUMAN]</a>                                            | 1,47 | 0,00 |
| Q8WWM9   | <a href="#">Cytoglobin OS=Homo sapiens GN=CYGB PE=1 SV=1 - [CYGB HUMAN]</a>                                                 | 2,16 | 0,00 |
| Q15067   | <a href="#">Peroxisomal acyl-coenzyme A oxidase 1 OS=Homo sapiens GN=ACOX1 PE=1 SV=3 - [ACOX1 HUMAN]</a>                    | 1,59 | 0,00 |
| Q6PI48   | <a href="#">Aspartate--tRNA ligase, mitochondrial OS=Homo sapiens GN=DARS2 PE=1 SV=1 - [SYDM HUMAN]</a>                     | 1,60 | 0,00 |
| Q9Y276   | <a href="#">Mitochondrial chaperone BCS1 OS=Homo sapiens GN=BCS1L PE=1 SV=1 - [BCS1 HUMAN]</a>                              | 1,56 | 0,00 |
| P17252   | <a href="#">Protein kinase C alpha type OS=Homo sapiens GN=PRKCA PE=1 SV=4 - [KPCA HUMAN]</a>                               | 1,80 | 0,00 |
| Q9H5V8-2 | <a href="#">Isoform 2 of CUB domain-containing protein 1 OS=Homo sapiens GN=CDCP1 - [CDCP1 HUMAN]</a>                       | 1,63 | 0,00 |

## A375 vs. A375PR1

|          |                                                                                                                               |      |      |
|----------|-------------------------------------------------------------------------------------------------------------------------------|------|------|
| Q96LZ7   | <a href="#">Regulator of microtubule dynamics protein 2 OS=Homo sapiens GN=FAM82A1 PE=1 SV=2 - [RMD2 HUMAN]</a>               | 1,55 | 0,00 |
| O60934   | <a href="#">Nibrin OS=Homo sapiens GN=NBN PE=1 SV=1 - [NBN HUMAN]</a>                                                         | 1,53 | 0,00 |
| Q9BUE6   | <a href="#">Iron-sulfur cluster assembly 1 homolog, mitochondrial OS=Homo sapiens GN=ISCA1 PE=2 SV=1 - [ISCA1 HUMAN]</a>      | 1,49 | 0,00 |
| Q8TBA6-2 | <a href="#">Isoform 2 of Golgin subfamily A member 5 OS=Homo sapiens GN=GOLGA5 - [GOGA5 HUMAN]</a>                            | 1,64 | 0,00 |
| Q92830   | <a href="#">Histone acetyltransferase KAT2A OS=Homo sapiens GN=KAT2A PE=1 SV=3 - [KAT2A HUMAN]</a>                            | 1,49 | 0,00 |
| Q96E39   | <a href="#">RNA binding motif protein, X-linked-like-1 OS=Homo sapiens GN=RBMXL1 PE=1 SV=1 - [RMXL1 HUMAN]</a>                | 1,51 | 0,00 |
| Q14571   | <a href="#">Inositol 1,4,5-trisphosphate receptor type 2 OS=Homo sapiens GN=ITPR2 PE=1 SV=2 - [ITPR2 HUMAN]</a>               | 1,50 | 0,00 |
| Q9UH99   | <a href="#">SUN domain-containing protein 2 OS=Homo sapiens GN=SUN2 PE=1 SV=3 - [SUN2 HUMAN]</a>                              | 1,56 | 0,00 |
| P21912   | <a href="#">Succinate dehydrogenase [ubiquinone] iron-sulfur subunit, mitochondrial OS=Homo sapiens GN=SDHB PE=1 SV=3 -</a>   | 1,57 | 0,00 |
| Q16610   | <a href="#">Extracellular matrix protein 1 OS=Homo sapiens GN=ECM1 PE=1 SV=2 - [ECM1 HUMAN]</a>                               | 2,26 | 0,00 |
| Q07954   | <a href="#">Prolow-density lipoprotein receptor-related protein 1 OS=Homo sapiens GN=LRP1 PE=1 SV=2 - [LRP1 HUMAN]</a>        | 2,00 | 0,00 |
| Q96DB5   | <a href="#">Regulator of microtubule dynamics protein 1 OS=Homo sapiens GN=FAM82B PE=1 SV=1 - [RMD1 HUMAN]</a>                | 1,74 | 0,00 |
| Q9UBV2   | <a href="#">Protein sel-1 homolog 1 OS=Homo sapiens GN=SEL1L PE=1 SV=3 - [SE1L1 HUMAN]</a>                                    | 1,54 | 0,00 |
| Q86Y91-2 | <a href="#">Isoform 2 of Kinesin-like protein KIF18B OS=Homo sapiens GN=KIF18B - [KI18B HUMAN]</a>                            | 2,12 | 0,00 |
| P80303   | <a href="#">Nucleobindin-2 OS=Homo sapiens GN=NUCB2 PE=1 SV=2 - [NUCB2 HUMAN]</a>                                             | 1,96 | 0,00 |
| Q10570   | <a href="#">Cleavage and polyadenylation specificity factor subunit 1 OS=Homo sapiens GN=CPSF1 PE=1 SV=2 - [CPSF1 HUMAN]</a>  | 1,47 | 0,00 |
| P31930   | <a href="#">Cytochrome b-c1 complex subunit 1, mitochondrial OS=Homo sapiens GN=UQCRC1 PE=1 SV=3 - [QCR1 HUMAN]</a>           | 1,47 | 0,00 |
| Q9ULW0   | <a href="#">Targeting protein for Xklp2 OS=Homo sapiens GN=TPX2 PE=1 SV=2 - [TPX2 HUMAN]</a>                                  | 1,77 | 0,00 |
| Q9UBF1   | <a href="#">Melanoma-associated antigen C2 OS=Homo sapiens GN=MAGEC2 PE=1 SV=1 - [MAGC2 HUMAN]</a>                            | 1,72 | 0,00 |
| Q9BQA9   | <a href="#">Uncharacterized protein C17orf62 OS=Homo sapiens GN=C17orf62 PE=1 SV=1 - [CQ062 HUMAN]</a>                        | 1,93 | 0,00 |
| Q9NSE4   | <a href="#">Isoleucine--tRNA ligase, mitochondrial OS=Homo sapiens GN=IARS2 PE=1 SV=2 - [SYIM HUMAN]</a>                      | 1,52 | 0,00 |
| P36957   | <a href="#">Dihydrolipoyllysine-residue succinyltransferase component of 2-oxoglutarate dehydrogenase complex, mitochondr</a> | 1,51 | 0,00 |
| Q9H9B4   | <a href="#">Sideroflexin-1 OS=Homo sapiens GN=SFXN1 PE=1 SV=4 - [SFXN1 HUMAN]</a>                                             | 1,51 | 0,00 |
| Q5SXM8   | <a href="#">DNL-type zinc finger protein OS=Homo sapiens GN=DNLZ PE=2 SV=1 - [DNLZ HUMAN]</a>                                 | 1,54 | 0,00 |
| Q86UT6   | <a href="#">NLR family member X1 OS=Homo sapiens GN=NLRX1 PE=1 SV=1 - [NLRX1 HUMAN]</a>                                       | 1,87 | 0,00 |
| Q9BUP3-3 | <a href="#">Isoform 3 of Oxidoreductase HTATIP2 OS=Homo sapiens GN=HTATIP2 - [HTAI2 HUMAN]</a>                                | 1,65 | 0,00 |
| Q96E29-2 | <a href="#">Isoform 2 of mTERF domain-containing protein 1, mitochondrial OS=Homo sapiens GN=MTERFD1 - [MTER1 HUMA]</a>       | 1,65 | 0,00 |
| Q8WUY1   | <a href="#">UPF0670 protein C8orf55 OS=Homo sapiens GN=C8orf55 PE=1 SV=2 - [CH055 HUMAN]</a>                                  | 1,54 | 0,00 |
| Q9H330-3 | <a href="#">Isoform 3 of Transmembrane protein C9orf5 OS=Homo sapiens GN=C9orf5 - [CI005 HUMAN]</a>                           | 1,74 | 0,00 |
| P54851   | <a href="#">Epithelial membrane protein 2 OS=Homo sapiens GN=EMP2 PE=2 SV=1 - [EMP2 HUMAN]</a>                                | 1,84 | 0,00 |
| Q9BV94-2 | <a href="#">Isoform 2 of ER degradation-enhancing alpha-mannosidase-like 2 OS=Homo sapiens GN=EDEM2 - [EDEM2 HUMAN]</a>       | 1,58 | 0,00 |
| Q9NUT2-2 | <a href="#">Isoform Short of ATP-binding cassette sub-family B member 8, mitochondrial OS=Homo sapiens GN=ABCB8 - [ABCB</a>   | 1,50 | 0,00 |
| P05106-2 | <a href="#">Isoform Beta-3B of Integrin beta-3 OS=Homo sapiens GN=ITGB3 - [ITB3 HUMAN]</a>                                    | 2,02 | 0,00 |

## A375 vs. A375PR1

|          |                                                                                                                                    |      |      |
|----------|------------------------------------------------------------------------------------------------------------------------------------|------|------|
| Q86WA6-2 | <a href="#">Isoform 2 of Valacyclovir hydrolase OS=Homo sapiens GN=BPHL - [BPHL HUMAN]</a>                                         | 1,73 | 0,00 |
| P61916   | <a href="#">Epididymal secretory protein E1 OS=Homo sapiens GN=NPC2 PE=1 SV=1 - [NPC2 HUMAN]</a>                                   | 2,38 | 0,00 |
| O75251   | <a href="#">NADH dehydrogenase [ubiquinone] iron-sulfur protein 7, mitochondrial OS=Homo sapiens GN=NDUFS7 PE=1 SV=3</a>           | 1,54 | 0,00 |
| O43766   | <a href="#">Lipoyl synthase, mitochondrial OS=Homo sapiens GN=LIAS PE=2 SV=3 - [LIAS HUMAN]</a>                                    | 1,51 | 0,00 |
| P56199   | <a href="#">Integrin alpha-1 OS=Homo sapiens GN=ITGA1 PE=1 SV=2 - [ITA1 HUMAN]</a>                                                 | 1,66 | 0,00 |
| Q8WU67   | <a href="#">Abhydrolase domain-containing protein 3 OS=Homo sapiens GN=ABHD3 PE=2 SV=2 - [ABHD3 HUMAN]</a>                         | 1,68 | 0,00 |
| Q9Y277   | <a href="#">Voltage-dependent anion-selective channel protein 3 OS=Homo sapiens GN=VDAC3 PE=1 SV=1 - [VDAC3 HUMAN]</a>             | 1,46 | 0,00 |
| Q9NVT9   | <a href="#">Armadillo repeat-containing protein 1 OS=Homo sapiens GN=ARMC1 PE=1 SV=1 - [ARMC1 HUMAN]</a>                           | 1,68 | 0,00 |
| O60266   | <a href="#">Adenylate cyclase type 3 OS=Homo sapiens GN=ADCY3 PE=1 SV=3 - [ADCY3 HUMAN]</a>                                        | 1,67 | 0,00 |
| Q15582   | <a href="#">Transforming growth factor-beta-induced protein ig-h3 OS=Homo sapiens GN=TGFBI PE=1 SV=1 - [BGH3 HUMAN]</a>            | 1,46 | 0,15 |
| Q9H9P8-2 | <a href="#">Isoform 2 of L-2-hydroxyglutarate dehydrogenase, mitochondrial OS=Homo sapiens GN=L2HGDH - [L2HDH HUMAN]</a>           | 1,51 | 0,15 |
| Q9Y666   | <a href="#">Solute carrier family 12 member 7 OS=Homo sapiens GN=SLC12A7 PE=1 SV=3 - [S12A7 HUMAN]</a>                             | 1,55 | 0,15 |
| Q8IW92   | <a href="#">Beta-galactosidase-1-like protein 2 OS=Homo sapiens GN=GLB1L2 PE=2 SV=1 - [GLBL2 HUMAN]</a>                            | 1,61 | 0,15 |
| Q10588   | <a href="#">ADP-ribosyl cyclase 2 OS=Homo sapiens GN=BST1 PE=1 SV=2 - [BST1 HUMAN]</a>                                             | 1,58 | 0,15 |
| Q5T160   | <a href="#">Probable arginine--tRNA ligase, mitochondrial OS=Homo sapiens GN=RARS2 PE=1 SV=1 - [SYRM HUMAN]</a>                    | 1,46 | 0,15 |
| Q8TE73   | <a href="#">Dynein heavy chain 5, axonemal OS=Homo sapiens GN=DNAH5 PE=1 SV=3 - [DYH5 HUMAN]</a>                                   | 1,37 | 0,15 |
| O60427   | <a href="#">Fatty acid desaturase 1 OS=Homo sapiens GN=FADS1 PE=1 SV=1 - [FADS1 HUMAN]</a>                                         | 1,78 | 0,15 |
| Q9NZJ7-2 | <a href="#">Isoform 2 of Mitochondrial carrier homolog 1 OS=Homo sapiens GN=MTCH1 - [MTCH1 HUMAN]</a>                              | 1,52 | 0,15 |
| Q14980   | <a href="#">Nuclear mitotic apparatus protein 1 OS=Homo sapiens GN=NUMA1 PE=1 SV=2 - [NUMA1 HUMAN]</a>                             | 1,69 | 0,15 |
| Q658P3-4 | <a href="#">Isoform 4 of Metalloreductase STEAP3 OS=Homo sapiens GN=STEAP3 - [STEA3 HUMAN]</a>                                     | 1,68 | 0,15 |
| Q9NPG3-2 | <a href="#">Isoform 2 of Ubinuclein-1 OS=Homo sapiens GN=UBN1 - [UBN1 HUMAN]</a>                                                   | 1,57 | 0,15 |
| P52848   | <a href="#">Bifunctional heparan sulfate N-deacetylase/N-sulfotransferase 1 OS=Homo sapiens GN=NDST1 PE=1 SV=1 - [NDST1 HUMAN]</a> | 1,57 | 0,15 |
| Q6YN16-2 | <a href="#">Isoform 2 of Hydroxysteroid dehydrogenase-like protein 2 OS=Homo sapiens GN=HSDL2 - [HSDL2 HUMAN]</a>                  | 1,63 | 0,15 |
| Q9BW19   | <a href="#">Kinesin-like protein KIFC1 OS=Homo sapiens GN=KIFC1 PE=1 SV=2 - [KIFC1 HUMAN]</a>                                      | 1,90 | 0,15 |
| Q5T3F8   | <a href="#">Transmembrane protein 63B OS=Homo sapiens GN=TMEM63B PE=1 SV=1 - [TM63B HUMAN]</a>                                     | 1,47 | 0,15 |
| Q9BRK5   | <a href="#">45 kDa calcium-binding protein OS=Homo sapiens GN=SDF4 PE=1 SV=1 - [CAB45 HUMAN]</a>                                   | 1,62 | 0,15 |
| Q15643   | <a href="#">Thyroid receptor-interacting protein 11 OS=Homo sapiens GN=TRIP11 PE=1 SV=3 - [TRIPB HUMAN]</a>                        | 1,41 | 0,15 |
| Q9BSH4   | <a href="#">Translational activator of cytochrome c oxidase 1 OS=Homo sapiens GN=TACO1 PE=1 SV=1 - [TACO1 HUMAN]</a>               | 1,46 | 0,15 |
| O94919   | <a href="#">Endonuclease domain-containing 1 protein OS=Homo sapiens GN=ENDOD1 PE=1 SV=2 - [ENDD1 HUMAN]</a>                       | 1,58 | 0,15 |
| P21926   | <a href="#">CD9 antigen OS=Homo sapiens GN=CD9 PE=1 SV=4 - [CD9 HUMAN]</a>                                                         | 1,95 | 0,15 |
| Q5J8M3   | <a href="#">Transmembrane protein 85 OS=Homo sapiens GN=TMEM85 PE=1 SV=2 - [TMM85 HUMAN]</a>                                       | 1,46 | 0,15 |
| P17096-2 | <a href="#">Isoform HMG-Y of High mobility group protein HMG-I/HMG-Y OS=Homo sapiens GN=HMGA1 - [HMGA1 HUMAN]</a>                  | 1,75 | 0,15 |
| Q15006   | <a href="#">Tetratricopeptide repeat protein 35 OS=Homo sapiens GN=TTC35 PE=1 SV=1 - [TTC35 HUMAN]</a>                             | 1,50 | 0,15 |

## A375 vs. A375PR1

|          |                                                                                                                          |      |      |
|----------|--------------------------------------------------------------------------------------------------------------------------|------|------|
| Q9UHQ4   | <a href="#">B-cell receptor-associated protein 29 OS=Homo sapiens GN=BCAP29 PE=1 SV=2 - [BAP29 HUMAN]</a>                | 1,50 | 0,15 |
| P57105   | <a href="#">Synaptojanin-2-binding protein OS=Homo sapiens GN=SYNJ2BP PE=1 SV=2 - [SYJ2B HUMAN]</a>                      | 1,54 | 0,15 |
| Q9Y4K3   | <a href="#">TNF receptor-associated factor 6 OS=Homo sapiens GN=TRAF6 PE=1 SV=1 - [TRAF6 HUMAN]</a>                      | 1,36 | 0,15 |
| P30048   | <a href="#">Thioredoxin-dependent peroxide reductase, mitochondrial OS=Homo sapiens GN=PRDX3 PE=1 SV=3 - [PRDX3 HUM]</a> | 1,49 | 0,15 |
| Q9UBU6   | <a href="#">Protein FAM8A1 OS=Homo sapiens GN=FAM8A1 PE=1 SV=1 - [FA8A1 HUMAN]</a>                                       | 1,46 | 0,15 |
| Q9NV64   | <a href="#">Transmembrane protein 39A OS=Homo sapiens GN=TMEM39A PE=2 SV=1 - [TM39A HUMAN]</a>                           | 1,44 | 0,15 |
| O95772-2 | <a href="#">Isoform 2 of MLN64 N-terminal domain homolog OS=Homo sapiens GN=STARD3NL - [MENTO HUMAN]</a>                 | 1,57 | 0,15 |
| P49454   | <a href="#">Centromere protein F OS=Homo sapiens GN=CENPF PE=1 SV=2 - [CENPF HUMAN]</a>                                  | 1,63 | 0,15 |
| Q969Q5   | <a href="#">Ras-related protein Rab-24 OS=Homo sapiens GN=RAB24 PE=1 SV=1 - [RAB24 HUMAN]</a>                            | 1,43 | 0,15 |
| O15118   | <a href="#">Niemann-Pick C1 protein OS=Homo sapiens GN=NPC1 PE=1 SV=2 - [NPC1 HUMAN]</a>                                 | 1,60 | 0,15 |
| Q14108   | <a href="#">Lysosome membrane protein 2 OS=Homo sapiens GN=SCARB2 PE=1 SV=2 - [SCRB2 HUMAN]</a>                          | 1,42 | 0,15 |
| P51649   | <a href="#">Succinate-semialdehyde dehydrogenase, mitochondrial OS=Homo sapiens GN=ALDH5A1 PE=1 SV=2 - [SSDH HUMA]</a>   | 1,71 | 0,15 |
| P42892-3 | <a href="#">Isoform C of Endothelin-converting enzyme 1 OS=Homo sapiens GN=ECE1 - [ECE1 HUMAN]</a>                       | 1,52 | 0,15 |
| Q9H936   | <a href="#">Mitochondrial glutamate carrier 1 OS=Homo sapiens GN=SLC25A22 PE=1 SV=1 - [GHC1 HUMAN]</a>                   | 1,54 | 0,15 |
| P08582   | <a href="#">Melanotransferrin OS=Homo sapiens GN=MFI2 PE=1 SV=2 - [TRFM HUMAN]</a>                                       | 1,74 | 0,15 |
| Q6SZW1   | <a href="#">Sterile alpha and TIR motif-containing protein 1 OS=Homo sapiens GN=SARM1 PE=1 SV=1 - [SARM1 HUMAN]</a>      | 1,64 | 0,15 |
| Q6P1M0   | <a href="#">Long-chain fatty acid transport protein 4 OS=Homo sapiens GN=SLC27A4 PE=1 SV=1 - [S27A4 HUMAN]</a>           | 1,52 | 0,15 |
| P51970   | <a href="#">NADH dehydrogenase [ubiquinone] 1 alpha subcomplex subunit 8 OS=Homo sapiens GN=NDUFA8 PE=1 SV=3 - [NDI</a>  | 1,53 | 0,15 |
| O75489   | <a href="#">NADH dehydrogenase [ubiquinone] iron-sulfur protein 3, mitochondrial OS=Homo sapiens GN=NDUFS3 PE=1 SV=1</a> | 1,45 | 0,15 |
| P33527-3 | <a href="#">Isoform 3 of Multidrug resistance-associated protein 1 OS=Homo sapiens GN=ABCC1 - [MRP1 HUMAN]</a>           | 1,43 | 0,15 |
| P00367   | <a href="#">Glutamate dehydrogenase 1, mitochondrial OS=Homo sapiens GN=GLUD1 PE=1 SV=2 - [DHE3 HUMAN]</a>               | 1,50 | 0,15 |
| O15400-2 | <a href="#">Isoform 2 of Syntaxin-7 OS=Homo sapiens GN=STX7 - [STX7 HUMAN]</a>                                           | 1,51 | 0,15 |
| Q8IXI1   | <a href="#">Mitochondrial Rho GTPase 2 OS=Homo sapiens GN=RHOT2 PE=1 SV=2 - [MIRO2 HUMAN]</a>                            | 1,59 | 0,15 |
| Q96GQ5   | <a href="#">UPF0420 protein C16orf58 OS=Homo sapiens GN=C16orf58 PE=1 SV=2 - [CP058 HUMAN]</a>                           | 1,52 | 0,15 |
| Q96IG2-2 | <a href="#">Isoform 2 of F-box/LRR-repeat protein 20 OS=Homo sapiens GN=FBXL20 - [FXL20 HUMAN]</a>                       | 1,48 | 0,15 |
| O15321   | <a href="#">Transmembrane 9 superfamily member 1 OS=Homo sapiens GN=TM9SF1 PE=2 SV=2 - [TM9S1 HUMAN]</a>                 | 1,51 | 0,15 |
| Q8NAP3   | <a href="#">Zinc finger and BTB domain-containing protein 38 OS=Homo sapiens GN=ZBTB38 PE=1 SV=2 - [ZBT38 HUMAN]</a>     | 1,71 | 0,15 |
| Q15390   | <a href="#">Mitochondrial fission regulator 1 OS=Homo sapiens GN=MTFR1 PE=1 SV=2 - [MTFR1 HUMAN]</a>                     | 1,53 | 0,15 |
| Q99569-2 | <a href="#">Isoform 2 of Plakophilin-4 OS=Homo sapiens GN=PKP4 - [PKP4 HUMAN]</a>                                        | 1,47 | 0,15 |
| O14656   | <a href="#">Torsin-1A OS=Homo sapiens GN=TOR1A PE=1 SV=1 - [TOR1A HUMAN]</a>                                             | 1,45 | 0,15 |
| Q9Y2G8   | <a href="#">DnaJ homolog subfamily C member 16 OS=Homo sapiens GN=DNAJC16 PE=2 SV=3 - [DJC16 HUMAN]</a>                  | 1,52 | 0,15 |
| O43676   | <a href="#">NADH dehydrogenase [ubiquinone] 1 beta subcomplex subunit 3 OS=Homo sapiens GN=NDUFB3 PE=1 SV=3 - [NDU</a>   | 1,54 | 0,15 |
| P51151   | <a href="#">Ras-related protein Rab-9A OS=Homo sapiens GN=RAB9A PE=1 SV=1 - [RAB9A HUMAN]</a>                            | 1,56 | 0,15 |

## A375 vs. A375PR1

|          |                                                                                                                                             |      |      |
|----------|---------------------------------------------------------------------------------------------------------------------------------------------|------|------|
| Q96LW7-2 | <a href="#">Isoform 2 of Bcl10-interacting CARD protein OS=Homo sapiens GN=C9orf89 - [BINCA HUMAN]</a>                                      | 1,47 | 0,15 |
| P48449   | <a href="#">Lanosterol synthase OS=Homo sapiens GN=LSS PE=1 SV=1 - [ERG7 HUMAN]</a>                                                         | 1,49 | 0,15 |
| Q9BWM7   | <a href="#">Sideroflexin-3 OS=Homo sapiens GN=SFXN3 PE=2 SV=2 - [SFXN3 HUMAN]</a>                                                           | 1,55 | 0,15 |
| Q02318   | <a href="#">Sterol 26-hydroxylase, mitochondrial OS=Homo sapiens GN=CYP27A1 PE=1 SV=1 - [CP27A HUMAN]</a>                                   | 1,50 | 0,15 |
| Q9NUL7   | <a href="#">Probable ATP-dependent RNA helicase DDX28 OS=Homo sapiens GN=DDX28 PE=2 SV=2 - [DDX28 HUMAN]</a>                                | 1,48 | 0,15 |
| Q08722-2 | <a href="#">Isoform OA3-293 of Leukocyte surface antigen CD47 OS=Homo sapiens GN=CD47 - [CD47 HUMAN]</a>                                    | 1,50 | 0,15 |
| Q9P0J1   | <a href="#">[Pyruvate dehydrogenase [acetyl-transferring]]-phosphatase 1, mitochondrial OS=Homo sapiens GN=PDP1 PE=1 SV=1</a>               | 1,46 | 0,15 |
| P08910   | <a href="#">Abhydrolase domain-containing protein 2 OS=Homo sapiens GN=ABHD2 PE=2 SV=1 - [ABHD2 HUMAN]</a>                                  | 1,43 | 0,15 |
| Q02818   | <a href="#">Nucleobindin-1 OS=Homo sapiens GN=NUCB1 PE=1 SV=4 - [NUCB1 HUMAN]</a>                                                           | 1,47 | 0,15 |
| Q15629   | <a href="#">Translocating chain-associated membrane protein 1 OS=Homo sapiens GN=TRAM1 PE=1 SV=3 - [TRAM1 HUMAN]</a>                        | 1,54 | 0,15 |
| P45954   | <a href="#">Short/branched chain specific acyl-CoA dehydrogenase, mitochondrial OS=Homo sapiens GN=ACADSB PE=1 SV=1 - [ACADSB HUMAN]</a>    | 1,47 | 0,15 |
| Q96QE5   | <a href="#">Transcription elongation factor, mitochondrial OS=Homo sapiens GN=TEFM PE=1 SV=1 - [TEFM HUMAN]</a>                             | 1,41 | 0,15 |
| P08559   | <a href="#">Pyruvate dehydrogenase E1 component subunit alpha, somatic form, mitochondrial OS=Homo sapiens GN=PDHA1</a>                     | 1,45 | 0,15 |
| O43464-2 | <a href="#">Isoform 2 of Serine protease HTRA2, mitochondrial OS=Homo sapiens GN=HTRA2 - [HTRA2 HUMAN]</a>                                  | 1,59 | 0,15 |
| P05496   | <a href="#">ATP synthase lipid-binding protein, mitochondrial OS=Homo sapiens GN=ATP5G1 PE=2 SV=2 - [AT5G1 HUMAN]</a>                       | 1,49 | 0,15 |
| Q86Y39   | <a href="#">NADH dehydrogenase [ubiquinone] 1 alpha subcomplex subunit 11 OS=Homo sapiens GN=NDUFA11 PE=1 SV=3 - [NDUFA11 HUMAN]</a>        | 1,96 | 0,15 |
| Q8WVM0   | <a href="#">Dimethyladenosine transferase 1, mitochondrial OS=Homo sapiens GN=TFB1M PE=1 SV=1 - [TFB1M HUMAN]</a>                           | 1,55 | 0,15 |
| Q92878   | <a href="#">DNA repair protein RAD50 OS=Homo sapiens GN=RAD50 PE=1 SV=1 - [RAD50 HUMAN]</a>                                                 | 1,49 | 0,15 |
| Q12846   | <a href="#">Syntaxin-4 OS=Homo sapiens GN=STX4 PE=1 SV=2 - [STX4 HUMAN]</a>                                                                 | 1,44 | 0,15 |
| Q9NUQ7   | <a href="#">Ufm1-specific protease 2 OS=Homo sapiens GN=UFSP2 PE=2 SV=3 - [UFSP2 HUMAN]</a>                                                 | 1,52 | 0,15 |
| Q8NBZ7   | <a href="#">UDP-glucuronic acid decarboxylase 1 OS=Homo sapiens GN=UXS1 PE=1 SV=1 - [UXS1 HUMAN]</a>                                        | 1,57 | 0,15 |
| Q9NX40   | <a href="#">OCIA domain-containing protein 1 OS=Homo sapiens GN=OCIAD1 PE=1 SV=1 - [OCAD1 HUMAN]</a>                                        | 1,47 | 0,15 |
| P18433-2 | <a href="#">Isoform 2 of Receptor-type tyrosine-protein phosphatase alpha OS=Homo sapiens GN=PTPRA - [PTPRA HUMAN]</a>                      | 1,56 | 0,22 |
| O00478   | <a href="#">Butyrophilin subfamily 3 member A3 OS=Homo sapiens GN=BTN3A3 PE=1 SV=1 - [BT3A3 HUMAN]</a>                                      | 1,44 | 0,22 |
| Q8NFI5   | <a href="#">Retinoic acid-induced protein 3 OS=Homo sapiens GN=GPRC5A PE=1 SV=2 - [RAI3 HUMAN]</a>                                          | 1,77 | 0,22 |
| Q9BU61   | <a href="#">NADH dehydrogenase [ubiquinone] 1 alpha subcomplex assembly factor 3 OS=Homo sapiens GN=NDUFAF3 PE=1 SV=1 - [NDUFAF3 HUMAN]</a> | 1,49 | 0,22 |
| O15119-3 | <a href="#">Isoform III of T-box transcription factor TBX3 OS=Homo sapiens GN=TBX3 - [TBX3 HUMAN]</a>                                       | 1,54 | 0,22 |
| Q8TE99-2 | <a href="#">Isoform 2 of Acid phosphatase-like protein 2 OS=Homo sapiens GN=ACPL2 - [ACPL2 HUMAN]</a>                                       | 1,55 | 0,22 |
| Q16718   | <a href="#">NADH dehydrogenase [ubiquinone] 1 alpha subcomplex subunit 5 OS=Homo sapiens GN=NDUFA5 PE=1 SV=3 - [NDUFA5 HUMAN]</a>           | 1,47 | 0,22 |
| Q8N138-4 | <a href="#">Isoform 2 of ORM1-like protein 3 OS=Homo sapiens GN=ORMDL3 - [ORML3 HUMAN]</a>                                                  | 1,45 | 0,22 |
| P17152   | <a href="#">Transmembrane protein 11, mitochondrial OS=Homo sapiens GN=TMEM11 PE=1 SV=1 - [TMM11 HUMAN]</a>                                 | 1,43 | 0,22 |
| P05166   | <a href="#">Propionyl-CoA carboxylase beta chain, mitochondrial OS=Homo sapiens GN=PCCB PE=1 SV=3 - [PCCB HUMAN]</a>                        | 1,44 | 0,22 |
| Q99627   | <a href="#">COP9 signalosome complex subunit 8 OS=Homo sapiens GN=COPS8 PE=1 SV=1 - [CSN8 HUMAN]</a>                                        | 1,42 | 0,22 |

## A375 vs. A375PR1

|          |                                                                                                                               |      |      |
|----------|-------------------------------------------------------------------------------------------------------------------------------|------|------|
| P11177-2 | <a href="#">Isoform 2 of Pyruvate dehydrogenase E1 component subunit beta, mitochondrial OS=Homo sapiens GN=PDHB - [O</a>     | 1,45 | 0,22 |
| Q5ST30   | <a href="#">Valine--tRNA ligase, mitochondrial OS=Homo sapiens GN=VAR52 PE=1 SV=2 - [SYVM HUMAN]</a>                          | 1,42 | 0,22 |
| P11169   | <a href="#">Solute carrier family 2, facilitated glucose transporter member 3 OS=Homo sapiens GN=SLC2A3 PE=1 SV=1 - [GTR3</a> | 1,70 | 0,22 |
| Q5UCC4-2 | <a href="#">Isoform 2 of UPF0510 protein INM02 OS=Homo sapiens GN=C19orf63 - [INM02 HUMAN]</a>                                | 1,46 | 0,22 |
| Q13011   | <a href="#">Delta(3,5)-Delta(2,4)-dienoyl-CoA isomerase, mitochondrial OS=Homo sapiens GN=ECH1 PE=1 SV=2 - [ECH1 HUMA</a>     | 1,47 | 0,22 |
| Q9HBM0   | <a href="#">Vezatin OS=Homo sapiens GN=VEZT PE=1 SV=3 - [VEZA HUMAN]</a>                                                      | 1,55 | 0,22 |
| Q9H6X2-3 | <a href="#">Isoform 3 of Anthrax toxin receptor 1 OS=Homo sapiens GN=ANTXR1 - [ANTR1 HUMAN]</a>                               | 1,54 | 0,22 |
| Q9UGL1   | <a href="#">Lysine-specific demethylase 5B OS=Homo sapiens GN=KDM5B PE=1 SV=3 - [KDM5B HUMAN]</a>                             | 1,63 | 0,22 |
| Q709F0-3 | <a href="#">Isoform 3 of Acyl-CoA dehydrogenase family member 11 OS=Homo sapiens GN=ACAD11 - [ACD11 HUMAN]</a>                | 1,40 | 0,22 |
| Q02218   | <a href="#">2-oxoglutarate dehydrogenase, mitochondrial OS=Homo sapiens GN=OGDH PE=1 SV=3 - [ODO1 HUMAN]</a>                  | 1,56 | 0,22 |
| Q9H7Z7   | <a href="#">Prostaglandin E synthase 2 OS=Homo sapiens GN=PTGES2 PE=1 SV=1 - [PGES2 HUMAN]</a>                                | 1,50 | 0,22 |
| Q99805   | <a href="#">Transmembrane 9 superfamily member 2 OS=Homo sapiens GN=TM9SF2 PE=1 SV=1 - [TM9S2 HUMAN]</a>                      | 1,45 | 0,22 |
| O94788-2 | <a href="#">Isoform 2 of Retinal dehydrogenase 2 OS=Homo sapiens GN=ALDH1A2 - [AL1A2 HUMAN]</a>                               | 1,46 | 0,22 |
| Q8TC12-2 | <a href="#">Isoform 2 of Retinol dehydrogenase 11 OS=Homo sapiens GN=RDH11 - [RDH11 HUMAN]</a>                                | 1,65 | 0,22 |
| P62341   | <a href="#">Selenoprotein T OS=Homo sapiens GN=SELT PE=2 SV=2 - [SELT HUMAN]</a>                                              | 1,57 | 0,22 |
| Q8IW50-6 | <a href="#">Isoform 6 of Uncharacterized protein C9orf25 OS=Homo sapiens GN=C9orf25 - [CI025 HUMAN]</a>                       | 1,66 | 0,22 |
| O00400   | <a href="#">Acetyl-coenzyme A transporter 1 OS=Homo sapiens GN=SLC33A1 PE=1 SV=1 - [ACATN HUMAN]</a>                          | 1,56 | 0,22 |
| O43493-2 | <a href="#">Isoform TGN46 of Trans-Golgi network integral membrane protein 2 OS=Homo sapiens GN=TGOLN2 - [TGON2 HUM</a>       | 1,48 | 0,22 |
| P36542-2 | <a href="#">Isoform Heart of ATP synthase subunit gamma, mitochondrial OS=Homo sapiens GN=ATP5C1 - [ATPG HUMAN]</a>           | 1,57 | 0,22 |
| Q13439-3 | <a href="#">Isoform 3 of Golgin subfamily A member 4 OS=Homo sapiens GN=GOLGA4 - [GOGA4 HUMAN]</a>                            | 1,44 | 0,22 |
| Q5JTV8   | <a href="#">Torsin-1A-interacting protein 1 OS=Homo sapiens GN=TOR1AIP1 PE=1 SV=2 - [TOIP1 HUMAN]</a>                         | 1,45 | 0,22 |
| Q96D31   | <a href="#">Calcium release-activated calcium channel protein 1 OS=Homo sapiens GN=ORAI1 PE=1 SV=2 - [CRCM1 HUMAN]</a>        | 1,37 | 0,22 |
| O75306   | <a href="#">NADH dehydrogenase [ubiquinone] iron-sulfur protein 2, mitochondrial OS=Homo sapiens GN=NDUFS2 PE=1 SV=2</a>      | 1,42 | 0,22 |
| Q01850   | <a href="#">Cerebellar degeneration-related protein 2 OS=Homo sapiens GN=CDR2 PE=1 SV=2 - [CDR2 HUMAN]</a>                    | 1,36 | 0,22 |
| P13056   | <a href="#">Nuclear receptor subfamily 2 group C member 1 OS=Homo sapiens GN=NR2C1 PE=1 SV=2 - [NR2C1 HUMAN]</a>              | 1,34 | 0,22 |
| Q86UD1   | <a href="#">Out at first protein homolog OS=Homo sapiens GN=OAF PE=2 SV=1 - [OAF HUMAN]</a>                                   | 1,50 | 0,22 |
| O43678   | <a href="#">NADH dehydrogenase [ubiquinone] 1 alpha subcomplex subunit 2 OS=Homo sapiens GN=NDUFA2 PE=1 SV=3 - [NDI</a>       | 1,48 | 0,22 |
| Q9BV23   | <a href="#">Monoacylglycerol lipase ABHD6 OS=Homo sapiens GN=ABHD6 PE=2 SV=1 - [ABHD6 HUMAN]</a>                              | 1,70 | 0,22 |
| P30536   | <a href="#">Translocator protein OS=Homo sapiens GN=TSPO PE=1 SV=3 - [TSPOA HUMAN]</a>                                        | 1,54 | 0,22 |
| Q7L8L6   | <a href="#">FAST kinase domain-containing protein 5 OS=Homo sapiens GN=FASTKD5 PE=1 SV=1 - [FAKD5 HUMAN]</a>                  | 1,50 | 0,22 |
| Q9UN79   | <a href="#">Transcription factor SOX-13 OS=Homo sapiens GN=SOX13 PE=1 SV=3 - [SOX13 HUMAN]</a>                                | 1,53 | 0,22 |
| Q9NP92   | <a href="#">28S ribosomal protein S30, mitochondrial OS=Homo sapiens GN=MRPS30 PE=1 SV=2 - [RT30 HUMAN]</a>                   | 1,53 | 0,22 |
| Q9GZT6-2 | <a href="#">Isoform 2 of Coiled-coil domain-containing protein 90B, mitochondrial OS=Homo sapiens GN=CCDC90B - [CC90B H</a>   | 1,58 | 0,22 |

## A375 vs. A375PR1

|          |                                                                                                                                                 |      |      |
|----------|-------------------------------------------------------------------------------------------------------------------------------------------------|------|------|
| Q95140   | <a href="#">Mitofusin-2 OS=Homo sapiens GN=MFN2 PE=1 SV=3 - [MFN2 HUMAN]</a>                                                                    | 1,39 | 0,22 |
| Q9P210   | <a href="#">Cleavage and polyadenylation specificity factor subunit 2 OS=Homo sapiens GN=CPSF2 PE=1 SV=2 - [CPSF2 HUMAN]</a>                    | 1,39 | 0,22 |
| Q86UP2   | <a href="#">Kinectin OS=Homo sapiens GN=KTN1 PE=1 SV=1 - [KTN1 HUMAN]</a>                                                                       | 1,43 | 0,22 |
| Q04724   | <a href="#">Transducin-like enhancer protein 1 OS=Homo sapiens GN=TLE1 PE=1 SV=2 - [TLE1 HUMAN]</a>                                             | 1,60 | 0,22 |
| Q9NX62   | <a href="#">Inositol monophosphatase 3 OS=Homo sapiens GN=IMPAD1 PE=1 SV=1 - [IMPA3 HUMAN]</a>                                                  | 1,76 | 0,22 |
| Q8WVX9   | <a href="#">Fatty acyl-CoA reductase 1 OS=Homo sapiens GN=FAR1 PE=1 SV=1 - [FACR1 HUMAN]</a>                                                    | 1,44 | 0,22 |
| Q9NNW7-2 | <a href="#">Isoform 2 of Thioredoxin reductase 2, mitochondrial OS=Homo sapiens GN=TXNRD2 - [TRXR2 HUMAN]</a>                                   | 1,49 | 0,22 |
| Q95169   | <a href="#">NADH dehydrogenase [ubiquinone] 1 beta subcomplex subunit 8, mitochondrial OS=Homo sapiens GN=NDUFB8 PE=1 SV=1 - [NDUFB8 HUMAN]</a> | 1,44 | 0,22 |
| Q8TEK3-2 | <a href="#">Isoform 1 of Histone-lysine N-methyltransferase, H3 lysine-79 specific OS=Homo sapiens GN=DOT1L - [DOT1L HUMAN]</a>                 | 1,43 | 0,22 |
| P30837   | <a href="#">Aldehyde dehydrogenase X, mitochondrial OS=Homo sapiens GN=ALDH1B1 PE=1 SV=3 - [AL1B1 HUMAN]</a>                                    | 1,46 | 0,22 |
| Q7Z7H5-3 | <a href="#">Isoform 3 of Transmembrane emp24 domain-containing protein 4 OS=Homo sapiens GN=TMED4 - [TMED4 HUMAN]</a>                           | 1,47 | 0,22 |
| P00387-2 | <a href="#">Isoform 2 of NADH-cytochrome b5 reductase 3 OS=Homo sapiens GN=CYB5R3 - [NB5R3 HUMAN]</a>                                           | 1,44 | 0,22 |
| Q96I36   | <a href="#">Uncharacterized protein C12orf62 OS=Homo sapiens GN=C12orf62 PE=2 SV=1 - [CLO62 HUMAN]</a>                                          | 1,51 | 0,22 |
| Q9UJJ9   | <a href="#">N-acetylglucosamine-1-phosphotransferase subunit gamma OS=Homo sapiens GN=GNPTG PE=1 SV=1 - [GNPTG HUMAN]</a>                       | 1,61 | 0,22 |
| Q4G176   | <a href="#">Acyl-CoA synthetase family member 3, mitochondrial OS=Homo sapiens GN=ACSF3 PE=1 SV=3 - [ACSF3 HUMAN]</a>                           | 1,44 | 0,22 |
| Q93063   | <a href="#">Exostosin-2 OS=Homo sapiens GN=EXT2 PE=1 SV=1 - [EXT2 HUMAN]</a>                                                                    | 1,39 | 0,22 |
| O14686   | <a href="#">Histone-lysine N-methyltransferase MLL2 OS=Homo sapiens GN=MLL2 PE=1 SV=2 - [MLL2 HUMAN]</a>                                        | 1,77 | 0,22 |
| O94923   | <a href="#">D-glucuronyl C5-epimerase OS=Homo sapiens GN=GLCE PE=1 SV=3 - [GLCE HUMAN]</a>                                                      | 1,49 | 0,22 |
| Q15746-4 | <a href="#">Isoform 3B of Myosin light chain kinase, smooth muscle OS=Homo sapiens GN=MYLK - [MYLK HUMAN]</a>                                   | 1,40 | 0,22 |
| O95674   | <a href="#">Phosphatidate cytidylyltransferase 2 OS=Homo sapiens GN=CDS2 PE=1 SV=1 - [CDS2 HUMAN]</a>                                           | 1,65 | 0,22 |
| Q96HE9   | <a href="#">Proline-rich protein 11 OS=Homo sapiens GN=PRR11 PE=1 SV=1 - [PRR11 HUMAN]</a>                                                      | 1,51 | 0,22 |
| P43307   | <a href="#">Translocon-associated protein subunit alpha OS=Homo sapiens GN=SSR1 PE=1 SV=3 - [SSRA HUMAN]</a>                                    | 1,44 | 0,22 |
| P49069   | <a href="#">Calcium signal-modulating cyclophilin ligand OS=Homo sapiens GN=CAMLG PE=1 SV=1 - [CAMLG HUMAN]</a>                                 | 1,48 | 0,22 |
| Q9NUQ2   | <a href="#">1-acyl-sn-glycerol-3-phosphate acyltransferase epsilon OS=Homo sapiens GN=AGPAT5 PE=1 SV=3 - [PLCE HUMAN]</a>                       | 1,41 | 0,22 |
| P24539   | <a href="#">ATP synthase subunit b, mitochondrial OS=Homo sapiens GN=ATP5F1 PE=1 SV=2 - [AT5F1 HUMAN]</a>                                       | 1,42 | 0,22 |
| Q8TBF5   | <a href="#">Phosphatidylinositol-glycan biosynthesis class X protein OS=Homo sapiens GN=PIGX PE=2 SV=3 - [PIGX HUMAN]</a>                       | 1,45 | 0,22 |
| Q8NBJ4-2 | <a href="#">Isoform 2 of Golgi membrane protein 1 OS=Homo sapiens GN=GOLM1 - [GOLM1 HUMAN]</a>                                                  | 1,35 | 0,22 |
| Q9P2E9   | <a href="#">Ribosome-binding protein 1 OS=Homo sapiens GN=RRBP1 PE=1 SV=4 - [RRBP1 HUMAN]</a>                                                   | 1,43 | 0,22 |
| Q9HCU5   | <a href="#">Prolactin regulatory element-binding protein OS=Homo sapiens GN=PREB PE=1 SV=2 - [PREB HUMAN]</a>                                   | 1,39 | 0,22 |
| Q96DZ1   | <a href="#">Endoplasmic reticulum lectin 1 OS=Homo sapiens GN=ERLEC1 PE=1 SV=1 - [ERLEC HUMAN]</a>                                              | 1,58 | 0,22 |
| Q9BTC8-2 | <a href="#">Isoform 2 of Metastasis-associated protein MTA3 OS=Homo sapiens GN=MTA3 - [MTA3 HUMAN]</a>                                          | 1,42 | 0,22 |
| P50402   | <a href="#">Emerin OS=Homo sapiens GN=EMD PE=1 SV=1 - [EMD HUMAN]</a>                                                                           | 1,41 | 0,22 |
| O95639-3 | <a href="#">Isoform 3 of Cleavage and polyadenylation specificity factor subunit 4 OS=Homo sapiens GN=CPSF4 - [CPSF4 HUMAN]</a>                 | 1,46 | 0,22 |

## A375 vs. A375PR1

|          |                                                                                                                              |      |      |
|----------|------------------------------------------------------------------------------------------------------------------------------|------|------|
| Q9BT17   | <a href="#">Mitochondrial GTPase 1 OS=Homo sapiens GN=MTG1 PE=1 SV=2 - [MTG1 HUMAN]</a>                                      | 1,38 | 0,22 |
| O15126-2 | <a href="#">Isoform 2 of Secretory carrier-associated membrane protein 1 OS=Homo sapiens GN=SCAMP1 - [SCAMP1 HUMAN]</a>      | 1,45 | 0,22 |
| Q9BT40-2 | <a href="#">Isoform 2 of Inositol polyphosphate 5-phosphatase K OS=Homo sapiens GN=INPP5K - [INP5K HUMAN]</a>                | 1,46 | 0,22 |
| Q9UMS0-2 | <a href="#">Isoform 2 of NFU1 iron-sulfur cluster scaffold homolog, mitochondrial OS=Homo sapiens GN=NFU1 - [NFU1 HUMA]</a>  | 1,45 | 0,22 |
| O14524   | <a href="#">Transmembrane protein 194A OS=Homo sapiens GN=TMEM194A PE=1 SV=2 - [T194A HUMAN]</a>                             | 1,43 | 0,22 |
| Q9Y4P3   | <a href="#">Transducin beta-like protein 2 OS=Homo sapiens GN=TBL2 PE=1 SV=1 - [TBL2 HUMAN]</a>                              | 1,41 | 0,22 |
| Q00325-2 | <a href="#">Isoform B of Phosphate carrier protein, mitochondrial OS=Homo sapiens GN=SLC25A3 - [MPCP HUMAN]</a>              | 1,43 | 0,22 |
| Q6DD88   | <a href="#">Atlastin-3 OS=Homo sapiens GN=ATL3 PE=1 SV=1 - [ATLA3 HUMAN]</a>                                                 | 1,58 | 0,22 |
| P04626-4 | <a href="#">Isoform 4 of Receptor tyrosine-protein kinase erbB-2 OS=Homo sapiens GN=ERBB2 - [ERBB2 HUMAN]</a>                | 1,39 | 0,22 |
| P04920-2 | <a href="#">Isoform B1 of Anion exchange protein 2 OS=Homo sapiens GN=SLC4A2 - [B3A2 HUMAN]</a>                              | 1,51 | 0,22 |
| P45880-2 | <a href="#">Isoform 2 of Voltage-dependent anion-selective channel protein 2 OS=Homo sapiens GN=VDAC2 - [VDAC2 HUMAN]</a>    | 1,41 | 0,22 |
| Q9UQ90   | <a href="#">Paraplegin OS=Homo sapiens GN=SPG7 PE=1 SV=2 - [SPG7 HUMAN]</a>                                                  | 1,48 | 0,22 |
| O75052   | <a href="#">Carboxyl-terminal PDZ ligand of neuronal nitric oxide synthase protein OS=Homo sapiens GN=NOS1AP PE=1 SV=3 -</a> | 1,65 | 0,22 |
| Q1L5Z9   | <a href="#">LON peptidase N-terminal domain and RING finger protein 2 OS=Homo sapiens GN=LONRF2 PE=2 SV=3 - [LONF2 H</a>     | 1,47 | 0,22 |
| P24752   | <a href="#">Acetyl-CoA acetyltransferase, mitochondrial OS=Homo sapiens GN=ACAT1 PE=1 SV=1 - [THIL HUMAN]</a>                | 1,50 | 0,22 |
| O14662-2 | <a href="#">Isoform A of Syntaxin-16 OS=Homo sapiens GN=STX16 - [STX16 HUMAN]</a>                                            | 1,42 | 0,22 |
| Q15771   | <a href="#">Ras-related protein Rab-30 OS=Homo sapiens GN=RAB30 PE=1 SV=2 - [RAB30 HUMAN]</a>                                | 1,42 | 0,22 |
| Q53HL2   | <a href="#">Borealin OS=Homo sapiens GN=CDCA8 PE=1 SV=2 - [BOREA HUMAN]</a>                                                  | 1,57 | 0,22 |
| P42167   | <a href="#">Lamina-associated polypeptide 2, isoforms beta/gamma OS=Homo sapiens GN=TMPO PE=1 SV=2 - [LAP2B HUMAN]</a>       | 1,46 | 0,22 |
| O75746   | <a href="#">Calcium-binding mitochondrial carrier protein Aralar1 OS=Homo sapiens GN=SLC25A12 PE=1 SV=2 - [CMC1 HUMA]</a>    | 1,49 | 0,22 |
| Q96L58   | <a href="#">Beta-1,3-galactosyltransferase 6 OS=Homo sapiens GN=B3GALT6 PE=2 SV=2 - [B3GT6 HUMAN]</a>                        | 1,43 | 0,22 |
| Q9BVS5   | <a href="#">Potential tRNA (adenine(58)-N(1))-methyltransferase catalytic subunit TRMT61B OS=Homo sapiens GN=TRMT61B F</a>   | 1,41 | 0,22 |
| Q8WUM9   | <a href="#">Sodium-dependent phosphate transporter 1 OS=Homo sapiens GN=SLC20A1 PE=1 SV=1 - [S20A1 HUMAN]</a>                | 1,55 | 0,22 |
| Q9H845   | <a href="#">Acyl-CoA dehydrogenase family member 9, mitochondrial OS=Homo sapiens GN=ACAD9 PE=1 SV=1 - [ACAD9 HUM</a>        | 1,41 | 0,22 |
| Q58719   | <a href="#">Vesicle transport protein SFT2C OS=Homo sapiens GN=SFT2D3 PE=2 SV=1 - [SFT2C HUMAN]</a>                          | 1,62 | 0,22 |
| O94826   | <a href="#">Mitochondrial import receptor subunit TOM70 OS=Homo sapiens GN=TOMM70A PE=1 SV=1 - [TOM70 HUMAN]</a>             | 1,43 | 0,22 |
| P51636-3 | <a href="#">Isoform C of Caveolin-2 OS=Homo sapiens GN=CAV2 - [CAV2 HUMAN]</a>                                               | 1,58 | 0,22 |
| Q53EU6   | <a href="#">Glycerol-3-phosphate acyltransferase 3 OS=Homo sapiens GN=AGPAT9 PE=1 SV=2 - [GPAT3 HUMAN]</a>                   | 1,46 | 0,22 |
| Q96JB6   | <a href="#">Lysyl oxidase homolog 4 OS=Homo sapiens GN=LOXL4 PE=1 SV=1 - [LOXL4 HUMAN]</a>                                   | 1,95 | 0,22 |
| P47985   | <a href="#">Cytochrome b-c1 complex subunit Rieske, mitochondrial OS=Homo sapiens GN=UQCRCF1 PE=1 SV=2 - [UCRI HUM/</a>      | 1,49 | 0,22 |
| Q16775   | <a href="#">Hydroxyacylglutathione hydrolase, mitochondrial OS=Homo sapiens GN=HAGH PE=1 SV=2 - [GLO2 HUMAN]</a>             | 1,51 | 0,22 |
| Q96AE7   | <a href="#">Tetratricopeptide repeat protein 17 OS=Homo sapiens GN=TTC17 PE=1 SV=1 - [TTC17 HUMAN]</a>                       | 1,37 | 0,22 |
| P82932   | <a href="#">28S ribosomal protein S6, mitochondrial OS=Homo sapiens GN=MRPS6 PE=1 SV=3 - [RT06 HUMAN]</a>                    | 1,45 | 0,22 |



## A375 vs. A375PR1

|          |                                                                                                                                           |      |      |
|----------|-------------------------------------------------------------------------------------------------------------------------------------------|------|------|
| Q13214-2 | <a href="#">Isoform 2 of Semaphorin-3B OS=Homo sapiens GN=SEMA3B - [SEM3B HUMAN]</a>                                                      | 1,70 | 0,22 |
| P56385   | <a href="#">ATP synthase subunit e, mitochondrial OS=Homo sapiens GN=ATP5I PE=1 SV=2 - [ATP5I HUMAN]</a>                                  | 1,40 | 0,22 |
| O95298   | <a href="#">NADH dehydrogenase [ubiquinone] 1 subunit C2 OS=Homo sapiens GN=NDUFC2 PE=1 SV=1 - [NDUC2 HUMAN]</a>                          | 1,45 | 0,22 |
| Q9BVT8   | <a href="#">Transmembrane and ubiquitin-like domain-containing protein 1 OS=Homo sapiens GN=TMUB1 PE=1 SV=1 - [TMUB1 HUMAN]</a>           | 1,44 | 0,22 |
| Q9Y2R0   | <a href="#">Coiled-coil domain-containing protein 56 OS=Homo sapiens GN=CCDC56 PE=1 SV=1 - [CCD56 HUMAN]</a>                              | 1,48 | 0,22 |
| P51572   | <a href="#">B-cell receptor-associated protein 31 OS=Homo sapiens GN=BCAP31 PE=1 SV=3 - [BAP31 HUMAN]</a>                                 | 1,49 | 0,22 |
| A8MXV4   | <a href="#">Nucleoside diphosphate-linked moiety X motif 19, mitochondrial OS=Homo sapiens GN=NUDT19 PE=1 SV=1 - [NUDT19 HUMAN]</a>       | 1,60 | 0,22 |
| Q96MT1   | <a href="#">RING finger protein 145 OS=Homo sapiens GN=RN145 PE=2 SV=2 - [RN145 HUMAN]</a>                                                | 1,46 | 0,22 |
| Q6P178   | <a href="#">Transmembrane protein 65 OS=Homo sapiens GN=TMEM65 PE=1 SV=2 - [TMM65 HUMAN]</a>                                              | 1,42 | 0,22 |
| Q9HAT2-2 | <a href="#">Isoform 2 of Sialate O-acetyltransferase OS=Homo sapiens GN=SIAE - [SIAE HUMAN]</a>                                           | 1,73 | 0,22 |
| Q08431-3 | <a href="#">Isoform 3 of Lactadherin OS=Homo sapiens GN=MFGE8 - [MFGM HUMAN]</a>                                                          | 1,53 | 0,22 |
| O43819   | <a href="#">Protein SCO2 homolog, mitochondrial OS=Homo sapiens GN=SCO2 PE=1 SV=3 - [SCO2 HUMAN]</a>                                      | 1,46 | 0,22 |
| P17568   | <a href="#">NADH dehydrogenase [ubiquinone] 1 beta subcomplex subunit 7 OS=Homo sapiens GN=NDUFB7 PE=1 SV=4 - [NDUFB7 HUMAN]</a>          | 1,39 | 0,22 |
| Q9NX18   | <a href="#">Succinate dehydrogenase assembly factor 2, mitochondrial OS=Homo sapiens GN=SDHAF2 PE=1 SV=1 - [SDHF2 HUMAN]</a>              | 1,43 | 0,22 |
| P56817-4 | <a href="#">Isoform D of Beta-secretase 1 OS=Homo sapiens GN=BACE1 - [BACE1 HUMAN]</a>                                                    | 1,36 | 0,22 |
| Q96RK0   | <a href="#">Protein capicua homolog OS=Homo sapiens GN=CIC PE=1 SV=2 - [CIC HUMAN]</a>                                                    | 1,41 | 0,22 |
| Q6PCB7   | <a href="#">Long-chain fatty acid transport protein 1 OS=Homo sapiens GN=SLC27A1 PE=2 SV=1 - [S27A1 HUMAN]</a>                            | 1,45 | 0,22 |
| P22695   | <a href="#">Cytochrome b-c1 complex subunit 2, mitochondrial OS=Homo sapiens GN=UQCRC2 PE=1 SV=3 - [QCR2 HUMAN]</a>                       | 1,40 | 0,22 |
| O60907-2 | <a href="#">Isoform 2 of F-box-like/WD repeat-containing protein TBL1X OS=Homo sapiens GN=TBL1X - [TBL1X HUMAN]</a>                       | 1,43 | 0,22 |
| O00217   | <a href="#">NADH dehydrogenase [ubiquinone] iron-sulfur protein 8, mitochondrial OS=Homo sapiens GN=NDUFS8 PE=1 SV=1 - [NDUFS8 HUMAN]</a> | 1,42 | 0,22 |
| P56181-2 | <a href="#">Isoform 2 of NADH dehydrogenase [ubiquinone] flavoprotein 3, mitochondrial OS=Homo sapiens GN=NDUFV3 - [NDUFV3 HUMAN]</a>     | 1,49 | 0,22 |
| Q9BSJ8   | <a href="#">Extended synaptotagmin-1 OS=Homo sapiens GN=ESYT1 PE=1 SV=1 - [ESYT1 HUMAN]</a>                                               | 1,47 | 0,22 |
| O60220   | <a href="#">Mitochondrial import inner membrane translocase subunit Tim8 A OS=Homo sapiens GN=TIMM8A PE=1 SV=1 - [TIMM8A HUMAN]</a>       | 1,39 | 0,22 |
| Q9HAV7   | <a href="#">GrpE protein homolog 1, mitochondrial OS=Homo sapiens GN=GRPE1 PE=1 SV=2 - [GRPE1 HUMAN]</a>                                  | 1,46 | 0,22 |
| P25705   | <a href="#">ATP synthase subunit alpha, mitochondrial OS=Homo sapiens GN=ATP5A1 PE=1 SV=1 - [ATPA HUMAN]</a>                              | 1,38 | 0,22 |
| O15155   | <a href="#">BET1 homolog OS=Homo sapiens GN=BET1 PE=1 SV=1 - [BET1 HUMAN]</a>                                                             | 1,40 | 0,22 |
| Q96S59   | <a href="#">Ran-binding protein 9 OS=Homo sapiens GN=RANBP9 PE=1 SV=1 - [RANBP9 HUMAN]</a>                                                | 1,43 | 0,22 |
| Q5THJ4-2 | <a href="#">Isoform 2 of Vacuolar protein sorting-associated protein 13D OS=Homo sapiens GN=VPS13D - [VP13D HUMAN]</a>                    | 1,39 | 0,22 |
| Q13232   | <a href="#">Nucleoside diphosphate kinase 3 OS=Homo sapiens GN=NME3 PE=1 SV=2 - [NDK3 HUMAN]</a>                                          | 1,56 | 0,22 |
| Q9H0L4   | <a href="#">Cleavage stimulation factor subunit 2 tau variant OS=Homo sapiens GN=CSTF2T PE=1 SV=1 - [CSTF2T HUMAN]</a>                    | 1,29 | 0,22 |
| P15151-3 | <a href="#">Isoform Gamma of Poliovirus receptor OS=Homo sapiens GN=PVR - [PVR HUMAN]</a>                                                 | 1,53 | 0,22 |
| Q13641   | <a href="#">Trophoblast glycoprotein OS=Homo sapiens GN=TPBG PE=1 SV=1 - [TPBG HUMAN]</a>                                                 | 1,43 | 0,22 |
| Q9BQD7   | <a href="#">Protein FAM173A OS=Homo sapiens GN=FAM173A PE=2 SV=1 - [F173A HUMAN]</a>                                                      | 1,41 | 0,22 |

## A375 vs. A375PR1

|          |                                                                                                                               |      |      |
|----------|-------------------------------------------------------------------------------------------------------------------------------|------|------|
| Q9UDW1   | <a href="#">Cytochrome b-c1 complex subunit 9 OS=Homo sapiens GN=UQCR10 PE=1 SV=3 - [QCR9 HUMAN]</a>                          | 1,45 | 0,22 |
| Q8WXX9   | <a href="#">Selenoprotein M OS=Homo sapiens GN=SELM PE=1 SV=3 - [SELM HUMAN]</a>                                              | 1,50 | 0,22 |
| P61018   | <a href="#">Ras-related protein Rab-4B OS=Homo sapiens GN=RAB4B PE=1 SV=1 - [RAB4B HUMAN]</a>                                 | 1,53 | 0,22 |
| O43674   | <a href="#">NADH dehydrogenase [ubiquinone] 1 beta subcomplex subunit 5, mitochondrial OS=Homo sapiens GN=NDUFB5 PE</a>       | 1,46 | 0,29 |
| O94901-3 | <a href="#">Isoform 3 of SUN domain-containing protein 1 OS=Homo sapiens GN=SUN1 - [SUN1 HUMAN]</a>                           | 1,62 | 0,29 |
| P27824   | <a href="#">Calnexin OS=Homo sapiens GN=CANX PE=1 SV=2 - [CALX HUMAN]</a>                                                     | 1,45 | 0,29 |
| Q69YH5   | <a href="#">Cell division cycle-associated protein 2 OS=Homo sapiens GN=CDCA2 PE=1 SV=2 - [CDCA2 HUMAN]</a>                   | 1,46 | 0,29 |
| Q96A26   | <a href="#">Protein FAM162A OS=Homo sapiens GN=FAM162A PE=1 SV=2 - [F162A HUMAN]</a>                                          | 1,73 | 0,29 |
| Q9C004   | <a href="#">Protein sprouty homolog 4 OS=Homo sapiens GN=SPRY4 PE=1 SV=2 - [SPY4 HUMAN]</a>                                   | 1,61 | 0,29 |
| P11310   | <a href="#">Medium-chain specific acyl-CoA dehydrogenase, mitochondrial OS=Homo sapiens GN=ACADM PE=1 SV=1 - [ACADM</a>       | 1,48 | 0,29 |
| O00592-2 | <a href="#">Isoform 2 of Podocalyxin OS=Homo sapiens GN=PODXL - [PODXL HUMAN]</a>                                             | 1,50 | 0,29 |
| Q9H5Y7   | <a href="#">SLIT and NTRK-like protein 6 OS=Homo sapiens GN=SLITRK6 PE=1 SV=3 - [SLIK6 HUMAN]</a>                             | 1,50 | 0,29 |
| Q9NX47   | <a href="#">E3 ubiquitin-protein ligase MARCH5 OS=Homo sapiens GN=MARCH5 PE=1 SV=1 - [MARH5 HUMAN]</a>                        | 1,36 | 0,29 |
| Q86UL3   | <a href="#">Glycerol-3-phosphate acyltransferase 4 OS=Homo sapiens GN=AGPAT6 PE=1 SV=1 - [GPAT4 HUMAN]</a>                    | 1,50 | 0,29 |
| Q9NVH0   | <a href="#">Exonuclease 3'-5' domain-containing protein 2 OS=Homo sapiens GN=EXD2 PE=1 SV=1 - [EXD2 HUMAN]</a>                | 1,40 | 0,29 |
| Q8N2F6-3 | <a href="#">Isoform 3 of Armadillo repeat-containing protein 10 OS=Homo sapiens GN=ARMC10 - [ARM10 HUMAN]</a>                 | 1,42 | 0,29 |
| Q9BRB3-3 | <a href="#">Isoform 3 of Phosphatidylinositol N-acetylglucosaminyltransferase subunit Q OS=Homo sapiens GN=PIGQ - [PIGQ H</a> | 1,44 | 0,29 |
| P55055   | <a href="#">Oxysterols receptor LXR-beta OS=Homo sapiens GN=NR1H2 PE=1 SV=2 - [NR1H2 HUMAN]</a>                               | 1,34 | 0,29 |
| O15392-5 | <a href="#">Isoform 5 of Baculoviral IAP repeat-containing protein 5 OS=Homo sapiens GN=BIRC5 - [BIRC5 HUMAN]</a>             | 1,68 | 0,29 |
| Q9Y2Z9   | <a href="#">Ubiquinone biosynthesis monooxygenase COQ6 OS=Homo sapiens GN=COQ6 PE=1 SV=2 - [COQ6 HUMAN]</a>                   | 1,40 | 0,29 |
| Q8WVI0   | <a href="#">UPF0640 protein C3orf78 OS=Homo sapiens GN=C3orf78 PE=2 SV=2 - [CC078 HUMAN]</a>                                  | 1,45 | 0,29 |
| O95197-2 | <a href="#">Isoform 2 of Reticulon-3 OS=Homo sapiens GN=RTN3 - [RTN3 HUMAN]</a>                                               | 1,46 | 0,29 |
| P35908   | <a href="#">Keratin, type II cytoskeletal 2 epidermal OS=Homo sapiens GN=KRT2 PE=1 SV=2 - [K22E HUMAN]</a>                    | 1,65 | 0,29 |
| Q5JRX3   | <a href="#">Presequence protease, mitochondrial OS=Homo sapiens GN=PITRM1 PE=1 SV=2 - [PREP HUMAN]</a>                        | 1,38 | 0,29 |
| Q9UIW2   | <a href="#">Plexin-A1 OS=Homo sapiens GN=PLXNA1 PE=1 SV=3 - [PLXA1 HUMAN]</a>                                                 | 1,35 | 0,29 |
| Q6UVK1   | <a href="#">Chondroitin sulfate proteoglycan 4 OS=Homo sapiens GN=CSPG4 PE=1 SV=2 - [CSPG4 HUMAN]</a>                         | 1,49 | 0,29 |
| Q9HDC9   | <a href="#">Adipocyte plasma membrane-associated protein OS=Homo sapiens GN=APMAP PE=1 SV=2 - [APMAP HUMAN]</a>               | 1,43 | 0,29 |
| Q9BS91   | <a href="#">Probable UDP-sugar transporter protein SLC35A5 OS=Homo sapiens GN=SLC35A5 PE=1 SV=2 - [S35A5 HUMAN]</a>           | 1,38 | 0,29 |
| Q96BY9   | <a href="#">Transmembrane protein 66 OS=Homo sapiens GN=TMEM66 PE=1 SV=1 - [TMM66 HUMAN]</a>                                  | 1,48 | 0,29 |
| P49448   | <a href="#">Glutamate dehydrogenase 2, mitochondrial OS=Homo sapiens GN=GLUD2 PE=1 SV=2 - [DHE4 HUMAN]</a>                    | 1,41 | 0,29 |
| Q96HY7   | <a href="#">Probable 2-oxoglutarate dehydrogenase E1 component DHKTD1, mitochondrial OS=Homo sapiens GN=DHTKD1 PE=</a>        | 1,44 | 0,29 |
| Q13724   | <a href="#">Mannosyl-oligosaccharide glucosidase OS=Homo sapiens GN=MOGS PE=1 SV=5 - [MOGS HUMAN]</a>                         | 1,39 | 0,29 |
| Q9UI09   | <a href="#">NADH dehydrogenase [ubiquinone] 1 alpha subcomplex subunit 12 OS=Homo sapiens GN=NDUFA12 PE=1 SV=1 - [N</a>       | 1,46 | 0,29 |

## A375 vs. A375PR1

|          |                                                                                                                                             |      |      |
|----------|---------------------------------------------------------------------------------------------------------------------------------------------|------|------|
| Q96S66   | <a href="#">Chloride channel CLIC-like protein 1 OS=Homo sapiens GN=CLCC1 PE=1 SV=1 - [CLCC1 HUMAN]</a>                                     | 1,34 | 0,29 |
| Q5SWX8   | <a href="#">Protein odr-4 homolog OS=Homo sapiens GN=ODR4 PE=2 SV=1 - [ODR4 HUMAN]</a>                                                      | 1,58 | 0,29 |
| P30049   | <a href="#">ATP synthase subunit delta, mitochondrial OS=Homo sapiens GN=ATP5D PE=1 SV=2 - [ATPD HUMAN]</a>                                 | 1,38 | 0,29 |
| O15173   | <a href="#">Membrane-associated progesterone receptor component 2 OS=Homo sapiens GN=PGRMC2 PE=1 SV=1 - [PGRC2 HUMAN]</a>                   | 1,40 | 0,29 |
| Q96CG8   | <a href="#">Collagen triple helix repeat-containing protein 1 OS=Homo sapiens GN=CTHRC1 PE=1 SV=1 - [CTHR1 HUMAN]</a>                       | 1,76 | 0,29 |
| Q9H7D7-2 | <a href="#">Isoform 2 of WD repeat-containing protein 26 OS=Homo sapiens GN=WDR26 - [WDR26 HUMAN]</a>                                       | 1,29 | 0,29 |
| Q86SR1-3 | <a href="#">Isoform 3 of Polypeptide N-acetylgalactosaminyltransferase 10 OS=Homo sapiens GN=GALNT10 - [GLT10 HUMAN]</a>                    | 1,35 | 0,29 |
| Q86Y82   | <a href="#">Syntaxin-12 OS=Homo sapiens GN=STX12 PE=1 SV=1 - [STX12 HUMAN]</a>                                                              | 1,29 | 0,29 |
| O00461   | <a href="#">Golgi integral membrane protein 4 OS=Homo sapiens GN=GOLIM4 PE=1 SV=1 - [GOLI4 HUMAN]</a>                                       | 1,41 | 0,29 |
| Q9BS26   | <a href="#">Endoplasmic reticulum resident protein 44 OS=Homo sapiens GN=ERP44 PE=1 SV=1 - [ERP44 HUMAN]</a>                                | 1,44 | 0,29 |
| Q5W111   | <a href="#">SPRY domain-containing protein 7 OS=Homo sapiens GN=SPRYD7 PE=1 SV=2 - [SPRY7 HUMAN]</a>                                        | 1,35 | 0,29 |
| Q92896   | <a href="#">Golgi apparatus protein 1 OS=Homo sapiens GN=GLG1 PE=1 SV=2 - [GSLG1 HUMAN]</a>                                                 | 1,40 | 0,29 |
| Q8IY95-2 | <a href="#">Isoform 2 of Transmembrane protein 192 OS=Homo sapiens GN=TMEM192 - [TM192 HUMAN]</a>                                           | 1,38 | 0,29 |
| Q8WUK0-2 | <a href="#">Isoform 2 of Protein-tyrosine phosphatase mitochondrial 1 OS=Homo sapiens GN=PTPMT1 - [PTPM1 HUMAN]</a>                         | 1,37 | 0,29 |
| Q9H6V9   | <a href="#">UPF0554 protein C2orf43 OS=Homo sapiens GN=C2orf43 PE=1 SV=1 - [CB043 HUMAN]</a>                                                | 1,41 | 0,29 |
| Q6UWP7-2 | <a href="#">Isoform 2 of Lysocardiolipin acyltransferase 1 OS=Homo sapiens GN=LCLAT1 - [LCLT1 HUMAN]</a>                                    | 1,48 | 0,29 |
| Q96E11-3 | <a href="#">Isoform 3 of Ribosome-recycling factor, mitochondrial OS=Homo sapiens GN=MRRF - [RRFM HUMAN]</a>                                | 1,43 | 0,29 |
| Q99650-2 | <a href="#">Isoform 2 of Oncostatin-M-specific receptor subunit beta OS=Homo sapiens GN=OSMR - [OSMR HUMAN]</a>                             | 1,46 | 0,29 |
| O43920   | <a href="#">NADH dehydrogenase [ubiquinone] iron-sulfur protein 5 OS=Homo sapiens GN=NDUFS5 PE=1 SV=3 - [NDUS5 HUMAN]</a>                   | 1,44 | 0,29 |
| Q96T83   | <a href="#">Sodium/hydrogen exchanger 7 OS=Homo sapiens GN=SLC9A7 PE=1 SV=1 - [SL9A7 HUMAN]</a>                                             | 1,36 | 0,29 |
| O43181   | <a href="#">NADH dehydrogenase [ubiquinone] iron-sulfur protein 4, mitochondrial OS=Homo sapiens GN=NDUFS4 PE=1 SV=1 - [NDUFS4 HUMAN]</a>   | 1,45 | 0,29 |
| Q9UBV7   | <a href="#">Beta-1,4-galactosyltransferase 7 OS=Homo sapiens GN=B4GALT7 PE=1 SV=1 - [B4GT7 HUMAN]</a>                                       | 1,72 | 0,29 |
| Q9P032   | <a href="#">NADH dehydrogenase [ubiquinone] 1 alpha subcomplex assembly factor 4 OS=Homo sapiens GN=NDUFAF4 PE=1 SV=1 - [NDUFAF4 HUMAN]</a> | 1,41 | 0,29 |
| Q92545   | <a href="#">Transmembrane protein 131 OS=Homo sapiens GN=TMEM131 PE=1 SV=3 - [TM131 HUMAN]</a>                                              | 1,34 | 0,36 |
| Q96I45   | <a href="#">Transmembrane protein 141 OS=Homo sapiens GN=TMEM141 PE=2 SV=1 - [TM141 HUMAN]</a>                                              | 1,39 | 0,36 |
| Q5SNT2   | <a href="#">Transmembrane protein 201 OS=Homo sapiens GN=TMEM201 PE=1 SV=1 - [TM201 HUMAN]</a>                                              | 1,43 | 0,36 |
| P49959   | <a href="#">Double-strand break repair protein MRE11A OS=Homo sapiens GN=MRE11A PE=1 SV=3 - [MRE11 HUMAN]</a>                               | 1,27 | 0,36 |
| Q8NC60   | <a href="#">Nitric oxide-associated protein 1 OS=Homo sapiens GN=NOA1 PE=1 SV=2 - [NOA1 HUMAN]</a>                                          | 1,39 | 0,36 |
| Q92804-2 | <a href="#">Isoform Short of TATA-binding protein-associated factor 2N OS=Homo sapiens GN=TAF15 - [RBP56 HUMAN]</a>                         | 1,36 | 0,36 |
| Q9P0J0   | <a href="#">NADH dehydrogenase [ubiquinone] 1 alpha subcomplex subunit 13 OS=Homo sapiens GN=NDUFA13 PE=1 SV=3 - [NDUFA13 HUMAN]</a>        | 1,45 | 0,36 |
| Q8N3D4   | <a href="#">EH domain-binding protein 1-like protein 1 OS=Homo sapiens GN=EHBP1L1 PE=1 SV=2 - [EH1L1 HUMAN]</a>                             | 1,38 | 0,36 |
| O75947   | <a href="#">ATP synthase subunit d, mitochondrial OS=Homo sapiens GN=ATP5H PE=1 SV=3 - [ATP5H HUMAN]</a>                                    | 1,39 | 0,36 |
| P13645   | <a href="#">Keratin, type I cytoskeletal 10 OS=Homo sapiens GN=KRT10 PE=1 SV=6 - [K1C10 HUMAN]</a>                                          | 1,68 | 0,36 |

## A375 vs. A375PR1

|          |                                                                                                                           |      |      |
|----------|---------------------------------------------------------------------------------------------------------------------------|------|------|
| P51687   | <a href="#">Sulfite oxidase, mitochondrial OS=Homo sapiens GN=SUOX PE=1 SV=2 - [SUOX HUMAN]</a>                           | 1,40 | 0,36 |
| P48552   | <a href="#">Nuclear receptor-interacting protein 1 OS=Homo sapiens GN=NRIP1 PE=1 SV=2 - [NRIP1 HUMAN]</a>                 | 1,53 | 0,36 |
| Q86TV6   | <a href="#">Tetratricopeptide repeat protein 7B OS=Homo sapiens GN=TTC7B PE=1 SV=3 - [TTC7B HUMAN]</a>                    | 1,74 | 0,36 |
| P42785   | <a href="#">Lysosomal Pro-X carboxypeptidase OS=Homo sapiens GN=PRCP PE=1 SV=1 - [PCP HUMAN]</a>                          | 1,46 | 0,36 |
| Q16643   | <a href="#">Drebrin OS=Homo sapiens GN=DBN1 PE=1 SV=4 - [DREB HUMAN]</a>                                                  | 1,29 | 0,36 |
| P62072   | <a href="#">Mitochondrial import inner membrane translocase subunit Tim10 OS=Homo sapiens GN=TIMM10 PE=1 SV=1 - [TIV</a>  | 1,38 | 0,36 |
| P42166   | <a href="#">Lamina-associated polypeptide 2, isoform alpha OS=Homo sapiens GN=TMPO PE=1 SV=2 - [LAP2A HUMAN]</a>          | 1,61 | 0,36 |
| Q5TEC3   | <a href="#">Zinc finger protein 697 OS=Homo sapiens GN=ZNF697 PE=2 SV=2 - [ZN697 HUMAN]</a>                               | 1,58 | 0,36 |
| Q9NYM9   | <a href="#">BET1-like protein OS=Homo sapiens GN=BET1L PE=1 SV=1 - [BET1L HUMAN]</a>                                      | 1,36 | 0,36 |
| O00479   | <a href="#">High mobility group nucleosome-binding domain-containing protein 4 OS=Homo sapiens GN=HMGN4 PE=1 SV=3 - [</a> | 1,43 | 0,36 |
| Q99674   | <a href="#">Cell growth regulator with EF hand domain protein 1 OS=Homo sapiens GN=CGREF1 PE=2 SV=2 - [CGRE1 HUMAN]</a>   | 1,39 | 0,36 |
| Q6PL18   | <a href="#">ATPase family AAA domain-containing protein 2 OS=Homo sapiens GN=ATAD2 PE=1 SV=1 - [ATAD2 HUMAN]</a>          | 1,49 | 0,36 |
| O75477   | <a href="#">Erlin-1 OS=Homo sapiens GN=ERLIN1 PE=1 SV=1 - [ERLN1 HUMAN]</a>                                               | 1,43 | 0,36 |
| Q99828   | <a href="#">Calcium and integrin-binding protein 1 OS=Homo sapiens GN=CIB1 PE=1 SV=4 - [CIB1 HUMAN]</a>                   | 1,36 | 0,36 |
| P51648   | <a href="#">Fatty aldehyde dehydrogenase OS=Homo sapiens GN=ALDH3A2 PE=1 SV=1 - [AL3A2 HUMAN]</a>                         | 1,43 | 0,36 |
| O76024   | <a href="#">Wolframin OS=Homo sapiens GN=WFS1 PE=1 SV=2 - [WFS1 HUMAN]</a>                                                | 1,46 | 0,36 |
| P46199   | <a href="#">Translation initiation factor IF-2, mitochondrial OS=Homo sapiens GN=MTIF2 PE=1 SV=2 - [IF2M HUMAN]</a>       | 1,38 | 0,36 |
| Q13608   | <a href="#">Peroxisome assembly factor 2 OS=Homo sapiens GN=PEX6 PE=1 SV=2 - [PEX6 HUMAN]</a>                             | 1,35 | 0,36 |
| Q6UW78   | <a href="#">UPF0723 protein C11orf83 OS=Homo sapiens GN=C11orf83 PE=1 SV=2 - [CK083 HUMAN]</a>                            | 1,32 | 0,36 |
| O75208   | <a href="#">Ubiquinone biosynthesis protein COQ9, mitochondrial OS=Homo sapiens GN=COQ9 PE=1 SV=1 - [COQ9 HUMAN]</a>      | 1,32 | 0,36 |
| Q8IWT6   | <a href="#">Leucine-rich repeat-containing protein 8A OS=Homo sapiens GN=LRRRC8A PE=1 SV=1 - [LRC8A HUMAN]</a>            | 1,32 | 0,36 |
| Q9H0R6   | <a href="#">Glutamyl-tRNA(Gln) amidotransferase subunit A, mitochondrial OS=Homo sapiens GN=QRSL1 PE=1 SV=2 - [GATA H</a> | 1,33 | 0,36 |
| Q96EL2   | <a href="#">28S ribosomal protein S24, mitochondrial OS=Homo sapiens GN=MRPS24 PE=1 SV=1 - [RT24 HUMAN]</a>               | 1,37 | 0,36 |
| P07196   | <a href="#">Neurofilament light polypeptide OS=Homo sapiens GN=NEFL PE=1 SV=3 - [NFL HUMAN]</a>                           | 1,34 | 0,36 |
| Q9Y3D6   | <a href="#">Mitochondrial fission 1 protein OS=Homo sapiens GN=FIS1 PE=1 SV=2 - [FIS1 HUMAN]</a>                          | 1,40 | 0,36 |
| Q6PJG2   | <a href="#">Uncharacterized protein C14orf43 OS=Homo sapiens GN=C14orf43 PE=1 SV=2 - [CN043 HUMAN]</a>                    | 1,38 | 0,36 |
| Q6DKK2   | <a href="#">Tetratricopeptide repeat protein 19, mitochondrial OS=Homo sapiens GN=TTC19 PE=1 SV=4 - [TTC19 HUMAN]</a>     | 1,40 | 0,36 |
| Q15738   | <a href="#">Sterol-4-alpha-carboxylate 3-dehydrogenase, decarboxylating OS=Homo sapiens GN=NSDHL PE=1 SV=2 - [NSDHL H</a> | 1,38 | 0,36 |
| P61587   | <a href="#">Rho-related GTP-binding protein RhoE OS=Homo sapiens GN=RND3 PE=1 SV=1 - [RND3 HUMAN]</a>                     | 1,74 | 0,36 |
| Q9BSJ5-2 | <a href="#">Isoform 2 of Uncharacterized protein C17orf80 OS=Homo sapiens GN=C17orf80 - [CQ080 HUMAN]</a>                 | 1,34 | 0,36 |
| Q9NZ45   | <a href="#">CDGSH iron-sulfur domain-containing protein 1 OS=Homo sapiens GN=CISD1 PE=1 SV=1 - [CISD1 HUMAN]</a>          | 1,46 | 0,36 |
| P45877   | <a href="#">Peptidyl-prolyl cis-trans isomerase C OS=Homo sapiens GN=PPIC PE=1 SV=1 - [PPIC HUMAN]</a>                    | 1,49 | 0,36 |
| Q05639   | <a href="#">Elongation factor 1-alpha 2 OS=Homo sapiens GN=EEF1A2 PE=1 SV=1 - [EF1A2 HUMAN]</a>                           | 3,93 | 0,36 |

## A375 vs. A375PR1

|                |                                                                                                                                   |                    |                   |
|----------------|-----------------------------------------------------------------------------------------------------------------------------------|--------------------|-------------------|
| Q12996         | <a href="#">Cleavage stimulation factor subunit 3 OS=Homo sapiens GN=CSTF3 PE=1 SV=1 - [CSTF3 HUMAN]</a>                          | 1,37               | 0,36              |
| Q9Y6X4         | <a href="#">Protein FAM169A OS=Homo sapiens GN=FAM169A PE=1 SV=2 - [F169A HUMAN]</a>                                              | 1,33               | 0,36              |
| Q03519-2       | <a href="#">Isoform 2 of Antigen peptide transporter 2 OS=Homo sapiens GN=TAP2 - [TAP2 HUMAN]</a>                                 | 1,39               | 0,36              |
| Q14CZ7         | <a href="#">FAST kinase domain-containing protein 3 OS=Homo sapiens GN=FASTKD3 PE=2 SV=2 - [FAKD3 HUMAN]</a>                      | 1,40               | 0,36              |
| P07305-2       | <a href="#">Isoform 2 of Histone H1,0 OS=Homo sapiens GN=H1F0 - [H10 HUMAN]</a>                                                   | 1,41               | 0,36              |
| Q14254         | <a href="#">Flotillin-2 OS=Homo sapiens GN=FLOT2 PE=1 SV=2 - [FLOT2 HUMAN]</a>                                                    | 1,34               | 0,36              |
| Q99653         | <a href="#">Calcium-binding protein p22 OS=Homo sapiens GN=CHP PE=1 SV=3 - [CHP1 HUMAN]</a>                                       | 1,34               | 0,36              |
| Q68CZ1-2       | <a href="#">Isoform 2 of Protein fantom OS=Homo sapiens GN=RPGRIP1L - [FTM HUMAN]</a>                                             | 1,42               | 0,36              |
| P53355         | <a href="#">Death-associated protein kinase 1 OS=Homo sapiens GN=DAPK1 PE=1 SV=6 - [DAPK1 HUMAN]</a>                              | 1,32               | 0,36              |
| P0DJ93         | <a href="#">UPF0766 protein C6orf228 OS=Homo sapiens GN=C6orf228 PE=3 SV=1 - [CF228 HUMAN]</a>                                    | 1,41               | 0,36              |
| O95182         | <a href="#">NADH dehydrogenase [ubiquinone] 1 alpha subcomplex subunit 7 OS=Homo sapiens GN=NDUFA7 PE=1 SV=3 - [NDUFA7 HUMAN]</a> | 1,35               | 0,36              |
| Q9Y2K6         | <a href="#">Ubiquitin carboxyl-terminal hydrolase 20 OS=Homo sapiens GN=USP20 PE=1 SV=2 - [UBP20 HUMAN]</a>                       | 1,40               | 0,36              |
| Q96FL9-2       | <a href="#">Isoform 2 of Polypeptide N-acetylgalactosaminyltransferase 14 OS=Homo sapiens GN=GALNT14 - [GLT14 HUMAN]</a>          | 1,33               | 0,36              |
| O14657         | <a href="#">Torsin-1B OS=Homo sapiens GN=TOR1B PE=1 SV=2 - [TOR1B HUMAN]</a>                                                      | 1,37               | 0,36              |
| Q9NSI6-3       | <a href="#">Isoform C of Bromodomain and WD repeat-containing protein 1 OS=Homo sapiens GN=BRWD1 - [BRWD1 HUMAN]</a>              | 1,32               | 0,36              |
| O75054         | <a href="#">Immunoglobulin superfamily member 3 OS=Homo sapiens GN=IGSF3 PE=1 SV=3 - [IGSF3 HUMAN]</a>                            | 1,36               | 0,36              |
| P42765         | <a href="#">3-ketoacyl-CoA thiolase, mitochondrial OS=Homo sapiens GN=ACAA2 PE=1 SV=2 - [THIM HUMAN]</a>                          | 1,42               | 0,36              |
| Q96GD4         | <a href="#">Aurora kinase B OS=Homo sapiens GN=AURKB PE=1 SV=3 - [AURKB HUMAN]</a>                                                | 1,44               | 0,36              |
| Q8WZ42-5       | <a href="#">Isoform 5 of Titin OS=Homo sapiens GN=TTN - [TITIN HUMAN]</a>                                                         | 1,40               | 0,36              |
| <b>Gene ID</b> | <b>Gene Name</b>                                                                                                                  | <b>Fold Change</b> | <b>q-value(%)</b> |
| P07355         | <a href="#">Annexin A2 OS=Homo sapiens GN=ANXA2 PE=1 SV=2 - [ANXA2 HUMAN]</a>                                                     | 0,55               | 0,17              |
| P01906         | <a href="#">HLA class II histocompatibility antigen, DQ alpha 2 chain OS=Homo sapiens GN=HLA-DQA2 PE=2 SV=2 - [DQA2 HUMAN]</a>    | 0,56               | 0,36              |

## A375 vs. A375VR3

| Gene ID  | Gene Name                                                                                                                              | Fold Change | q-value(%) |
|----------|----------------------------------------------------------------------------------------------------------------------------------------|-------------|------------|
| P25815   | <a href="#">Protein S100-P OS=Homo sapiens GN=S100P PE=1 SV=2 - [S100P_HUMAN]</a>                                                      | 805,55      | 0,00       |
| O60732   | <a href="#">Melanoma-associated antigen C1 OS=Homo sapiens GN=MAGEC1 PE=1 SV=3 - [MAGC1_HUMAN]</a>                                     | 638279,27   | 0,00       |
| Q99959-2 | <a href="#">Isoform 1 of Plakophilin-2 OS=Homo sapiens GN=PKP2 - [PKP2_HUMAN]</a>                                                      | 5,35        | 0,00       |
| Q96Q89-4 | <a href="#">Isoform 4 of Kinesin-like protein KIF20B OS=Homo sapiens GN=KIF20B - [KI20B_HUMAN]</a>                                     | 6,60        | 0,00       |
| Q01543-2 | <a href="#">Isoform 2 of Friend leukemia integration 1 transcription factor OS=Homo sapiens GN=FLI1 - [FLI1_HUMAN]</a>                 | 6,34        | 0,00       |
| Q9NX02-3 | <a href="#">Isoform 3 of NACHT, LRR and PYD domains-containing protein 2 OS=Homo sapiens GN=NLRP2 - [NALP2_HUMAN]</a>                  | 1740207,92  | 0,00       |
| Q9Y446   | <a href="#">Plakophilin-3 OS=Homo sapiens GN=PKP3 PE=1 SV=1 - [PKP3_HUMAN]</a>                                                         | 18,94       | 0,00       |
| Q17RY6   | <a href="#">Lymphocyte antigen 6K OS=Homo sapiens GN=LY6K PE=1 SV=2 - [LY6K_HUMAN]</a>                                                 | 21,50       | 0,00       |
| Q7Z7L1   | <a href="#">Schlafen family member 11 OS=Homo sapiens GN=SLFN11 PE=1 SV=2 - [SLN11_HUMAN]</a>                                          | 7,48        | 0,00       |
| P31321   | <a href="#">cAMP-dependent protein kinase type I-beta regulatory subunit OS=Homo sapiens GN=PRKAR1B PE=1 SV=4 - [KAP1_HUMAN]</a>       | 2,77        | 0,00       |
| P82970   | <a href="#">High mobility group nucleosome-binding domain-containing protein 5 OS=Homo sapiens GN=HMGN5 PE=1 SV=1 - [HMGN5_HUMAN]</a>  | 17,58       | 0,00       |
| P20138   | <a href="#">Myeloid cell surface antigen CD33 OS=Homo sapiens GN=CD33 PE=1 SV=2 - [CD33_HUMAN]</a>                                     | 11,56       | 0,00       |
| P20337   | <a href="#">Ras-related protein Rab-3B OS=Homo sapiens GN=RAB3B PE=1 SV=2 - [RAB3B_HUMAN]</a>                                          | 2,34        | 0,00       |
| Q9H6S3   | <a href="#">Epidermal growth factor receptor kinase substrate 8-like protein 2 OS=Homo sapiens GN=EPS8L2 PE=1 SV=2 - [ES8L2_HUMAN]</a> | 4,87        | 0,00       |
| Q6KB66-2 | <a href="#">Isoform 2 of Keratin, type II cytoskeletal 80 OS=Homo sapiens GN=KRT80 - [K2C80_HUMAN]</a>                                 | 6,50        | 0,00       |
| O75369-6 | <a href="#">Isoform 6 of Filamin-B OS=Homo sapiens GN=FLNB - [FLNB_HUMAN]</a>                                                          | 4,14        | 0,00       |
| Q99608   | <a href="#">Necdin OS=Homo sapiens GN=NDN PE=2 SV=1 - [NECD_HUMAN]</a>                                                                 | 6,65        | 0,00       |
| Q13635-4 | <a href="#">Isoform S of Protein patched homolog 1 OS=Homo sapiens GN=PTCH1 - [PTC1_HUMAN]</a>                                         | 2,77        | 0,00       |
| Q9H4G0-4 | <a href="#">Isoform 4 of Band 4,1-like protein 1 OS=Homo sapiens GN=EPB41L1 - [E41L1_HUMAN]</a>                                        | 3,44        | 0,00       |
| Q96CF2   | <a href="#">Charged multivesicular body protein 4c OS=Homo sapiens GN=CHMP4C PE=1 SV=1 - [CHM4C_HUMAN]</a>                             | 7,20        | 0,00       |
| Q8TCU4-3 | <a href="#">Isoform 3 of Alstrom syndrome protein 1 OS=Homo sapiens GN=ALMS1 - [ALMS1_HUMAN]</a>                                       | 2,30        | 0,00       |
| P20908   | <a href="#">Collagen alpha-1(V) chain OS=Homo sapiens GN=COL5A1 PE=1 SV=3 - [CO5A1_HUMAN]</a>                                          | 7,57        | 0,00       |
| O75525-2 | <a href="#">Isoform 2 of KH domain-containing, RNA-binding, signal transduction-associated protein 3 OS=Homo sapiens GN=KHDRBS3</a>    | 16,06       | 0,00       |
| Q6P9B6   | <a href="#">TLD domain-containing protein KIAA1609 OS=Homo sapiens GN=KIAA1609 PE=1 SV=2 - [K1609_HUMAN]</a>                           | 1,84        | 0,00       |
| P32189-1 | <a href="#">Isoform 1 of Glycerol kinase OS=Homo sapiens GN=GK - [GLPK_HUMAN]</a>                                                      | 7,90        | 0,00       |
| P35612   | <a href="#">Beta-adducin OS=Homo sapiens GN=ADD2 PE=1 SV=3 - [ADDB_HUMAN]</a>                                                          | 3,71        | 0,00       |
| Q9UBF1   | <a href="#">Melanoma-associated antigen C2 OS=Homo sapiens GN=MAGEC2 PE=1 SV=1 - [MAGC2_HUMAN]</a>                                     | 2,36        | 0,00       |
| Q9BV40   | <a href="#">Vesicle-associated membrane protein 8 OS=Homo sapiens GN=VAMP8 PE=1 SV=1 - [VAMP8_HUMAN]</a>                               | 4,84        | 0,00       |
| Q92506   | <a href="#">Estradiol 17-beta-dehydrogenase 8 OS=Homo sapiens GN=HSD17B8 PE=1 SV=2 - [DHB8_HUMAN]</a>                                  | 2,51        | 0,00       |
| O00220   | <a href="#">Tumor necrosis factor receptor superfamily member 10A OS=Homo sapiens GN=TNFRSF10A PE=1 SV=3 - [TR10A_HUMAN]</a>           | 4,94        | 0,00       |
| P05120   | <a href="#">Plasminogen activator inhibitor 2 OS=Homo sapiens GN=SERPIN2 PE=1 SV=2 - [PAI2_HUMAN]</a>                                  | 36,00       | 0,00       |
| Q15147-2 | <a href="#">Isoform 1 of 1-phosphatidylinositol-4,5-bisphosphate phosphodiesterase beta-4 OS=Homo sapiens GN=PLCB4 - [PLCB4_HUMAN]</a> | 3,07        | 0,00       |

### A375 vs. A375VR3

|          |                                                                                                                             |            |      |
|----------|-----------------------------------------------------------------------------------------------------------------------------|------------|------|
| P26022   | <a href="#">Pentraxin-related protein PTX3 OS=Homo sapiens GN=PTX3 PE=1 SV=3 - [PTX3 HUMAN]</a>                             | 4,59       | 0,00 |
| P16144-4 | <a href="#">Isoform Beta-4D of Integrin beta-4 OS=Homo sapiens GN=ITGB4 - [ITB4 HUMAN]</a>                                  | 200,88     | 0,00 |
| Q6P5R6   | <a href="#">60S ribosomal protein L22-like 1 OS=Homo sapiens GN=RPL22L1 PE=1 SV=2 - [RL22L HUMAN]</a>                       | 3,88       | 0,00 |
| P05787   | <a href="#">Keratin, type II cytoskeletal 8 OS=Homo sapiens GN=KRT8 PE=1 SV=7 - [K2C8 HUMAN]</a>                            | 22,65      | 0,00 |
| P29317   | <a href="#">Ephrin type-A receptor 2 OS=Homo sapiens GN=EPHA2 PE=1 SV=2 - [EPHA2 HUMAN]</a>                                 | 6,52       | 0,00 |
| Q9UKU6   | <a href="#">Thyrotropin-releasing hormone-degrading ectoenzyme OS=Homo sapiens GN=TRHDE PE=2 SV=1 - [TRHDE HUMAN]</a>       | 60,82      | 0,00 |
| A8K2U0   | <a href="#">Alpha-2-macroglobulin-like protein 1 OS=Homo sapiens GN=A2ML1 PE=1 SV=3 - [A2ML1 HUMAN]</a>                     | 2,69       | 0,00 |
| Q6ZMK1-2 | <a href="#">Isoform 2 of Cysteine and histidine-rich protein 1 OS=Homo sapiens GN=CYHR1 - [CYHR1 HUMAN]</a>                 | 2,21       | 0,00 |
| Q13188   | <a href="#">Serine/threonine-protein kinase 3 OS=Homo sapiens GN=STK3 PE=1 SV=2 - [STK3 HUMAN]</a>                          | 1,84       | 0,00 |
| Q9NUL3-3 | <a href="#">Isoform 3 of Double-stranded RNA-binding protein Staufen homolog 2 OS=Homo sapiens GN=STAU2 - [STAU2 HUMAN]</a> | 1,76       | 0,00 |
| Q5JRK9   | <a href="#">Putative G antigen family E member 3 OS=Homo sapiens GN=PAGE2B PE=2 SV=1 - [GGEE3 HUMAN]</a>                    | 1341883,75 | 0,00 |
| Q9BT78   | <a href="#">COP9 signalosome complex subunit 4 OS=Homo sapiens GN=COPS4 PE=1 SV=1 - [CSN4 HUMAN]</a>                        | 1,74       | 0,00 |
| P10620   | <a href="#">Microsomal glutathione S-transferase 1 OS=Homo sapiens GN=MGST1 PE=1 SV=1 - [MGST1 HUMAN]</a>                   | 341,92     | 0,00 |
| P43155-2 | <a href="#">Isoform 2 of Carnitine O-acetyltransferase OS=Homo sapiens GN=CRAT - [CACP HUMAN]</a>                           | 2,52       | 0,00 |
| Q92466-2 | <a href="#">Isoform D1 of DNA damage-binding protein 2 OS=Homo sapiens GN=DDB2 - [DDB2 HUMAN]</a>                           | 2,45       | 0,00 |
| Q9UQ49   | <a href="#">Sialidase-3 OS=Homo sapiens GN=NEU3 PE=1 SV=1 - [NEUR3 HUMAN]</a>                                               | 2,48       | 0,00 |
| P43003   | <a href="#">Excitatory amino acid transporter 1 OS=Homo sapiens GN=SLC1A3 PE=1 SV=1 - [EAA1 HUMAN]</a>                      | 6,44       | 0,00 |
| Q6ZUT6   | <a href="#">Uncharacterized protein C15orf52 OS=Homo sapiens GN=C15orf52 PE=1 SV=1 - [CO052 HUMAN]</a>                      | 1,60       | 0,00 |
| Q92905   | <a href="#">COP9 signalosome complex subunit 5 OS=Homo sapiens GN=COPS5 PE=1 SV=4 - [CSN5 HUMAN]</a>                        | 1,68       | 0,00 |
| P07203   | <a href="#">Glutathione peroxidase 1 OS=Homo sapiens GN=GPX1 PE=1 SV=4 - [GPX1 HUMAN]</a>                                   | 1,63       | 0,00 |
| Q04727   | <a href="#">Transducin-like enhancer protein 4 OS=Homo sapiens GN=TLE4 PE=1 SV=3 - [TLE4 HUMAN]</a>                         | 1,73       | 0,00 |
| Q9P2K5-2 | <a href="#">Isoform 2 of Myelin expression factor 2 OS=Homo sapiens GN=MYEF2 - [MYEF2 HUMAN]</a>                            | 4,34       | 0,00 |
| Q9Y2T3   | <a href="#">Guanine deaminase OS=Homo sapiens GN=GDA PE=1 SV=1 - [GUAD HUMAN]</a>                                           | 327,76     | 0,00 |
| Q8IZD6   | <a href="#">Solute carrier family 22 member 15 OS=Homo sapiens GN=SLC22A15 PE=2 SV=1 - [S22AF HUMAN]</a>                    | 1,63       | 0,00 |
| O60437   | <a href="#">Periplakin OS=Homo sapiens GN=PPL PE=1 SV=4 - [PEPL HUMAN]</a>                                                  | 4,73       | 0,00 |
| Q15599   | <a href="#">Na(+)/H(+) exchange regulatory cofactor NHE-RF2 OS=Homo sapiens GN=SLC9A3R2 PE=1 SV=2 - [NHRF2 HUMAN]</a>       | 1,85       | 0,00 |
| Q6XQN6-3 | <a href="#">Isoform 3 of Nicotinate phosphoribosyltransferase OS=Homo sapiens GN=NAPRT1 - [PNCB HUMAN]</a>                  | 155,90     | 0,00 |
| P10301   | <a href="#">Ras-related protein R-Ras OS=Homo sapiens GN=RRAS PE=1 SV=1 - [RRAS HUMAN]</a>                                  | 2,33       | 0,00 |
| P56817-4 | <a href="#">Isoform D of Beta-secretase 1 OS=Homo sapiens GN=BACE1 - [BACE1 HUMAN]</a>                                      | 3,11       | 0,00 |
| Q96IF1   | <a href="#">LIM domain-containing protein ajuba OS=Homo sapiens GN=AJUBA PE=1 SV=1 - [AJUBA HUMAN]</a>                      | 1,99       | 0,00 |
| Q01955   | <a href="#">Collagen alpha-3(IV) chain OS=Homo sapiens GN=COL4A3 PE=1 SV=3 - [CO4A3 HUMAN]</a>                              | 1,67       | 0,00 |
| Q8N3D4   | <a href="#">EH domain-binding protein 1-like protein 1 OS=Homo sapiens GN=EHBP1L1 PE=1 SV=2 - [EH1L1 HUMAN]</a>             | 1,64       | 0,00 |
| P15144   | <a href="#">Aminopeptidase N OS=Homo sapiens GN=ANPEP PE=1 SV=4 - [AMPN HUMAN]</a>                                          | 7,47       | 0,00 |

## A375 vs. A375VR3

|          |                                                                                                                                   |       |      |
|----------|-----------------------------------------------------------------------------------------------------------------------------------|-------|------|
| Q9H6F2   | <a href="#">Trimeric intracellular cation channel type A OS=Homo sapiens GN=TMEM38A PE=1 SV=1 - [TM38A HUMAN]</a>                 | 3,80  | 0,00 |
| Q8IWR1   | <a href="#">Tripartite motif-containing protein 59 OS=Homo sapiens GN=TRIM59 PE=2 SV=1 - [TRI59 HUMAN]</a>                        | 2,67  | 0,00 |
| P15328   | <a href="#">Folate receptor alpha OS=Homo sapiens GN=FOLR1 PE=1 SV=3 - [FOLR1 HUMAN]</a>                                          | 7,44  | 0,00 |
| P10696   | <a href="#">Alkaline phosphatase, placental-like OS=Homo sapiens GN=ALPL2 PE=1 SV=4 - [PPBN HUMAN]</a>                            | 13,02 | 0,00 |
| O14657   | <a href="#">Torsin-1B OS=Homo sapiens GN=TOR1B PE=1 SV=2 - [TOR1B HUMAN]</a>                                                      | 3,61  | 0,00 |
| Q13887   | <a href="#">Krueppel-like factor 5 OS=Homo sapiens GN=KLF5 PE=1 SV=2 - [KLF5 HUMAN]</a>                                           | 3,23  | 0,00 |
| Q86UL8-2 | <a href="#">Isoform 2 of Membrane-associated guanylate kinase, WW and PDZ domain-containing protein 2 OS=Homo sapiens GN=MA</a>   | 21,86 | 0,00 |
| Q9NS25   | <a href="#">Sperm protein associated with the nucleus on the X chromosome B/F OS=Homo sapiens GN=SPANXB1 PE=2 SV=1 - [SPNXB</a>   | 35,35 | 0,00 |
| Q86WV6   | <a href="#">Transmembrane protein 173 OS=Homo sapiens GN=TMEM173 PE=1 SV=1 - [TM173 HUMAN]</a>                                    | 2,89  | 0,00 |
| Q16270   | <a href="#">Insulin-like growth factor-binding protein 7 OS=Homo sapiens GN=IGFBP7 PE=1 SV=1 - [IBP7 HUMAN]</a>                   | 2,02  | 0,00 |
| Q9HAU0-5 | <a href="#">Isoform 5 of Pleckstrin homology domain-containing family A member 5 OS=Homo sapiens GN=PLEKHA5 - [PKHA5 HUMAN]</a>   | 2,05  | 0,00 |
| Q86SJ2   | <a href="#">Amphoterin-induced protein 2 OS=Homo sapiens GN=AMIGO2 PE=1 SV=1 - [AMGO2 HUMAN]</a>                                  | 17,25 | 0,00 |
| P08779   | <a href="#">Keratin, type I cytoskeletal 16 OS=Homo sapiens GN=KRT16 PE=1 SV=4 - [K1C16 HUMAN]</a>                                | 1,62  | 0,00 |
| Q8N8U2   | <a href="#">Chromodomain Y-like protein 2 OS=Homo sapiens GN=CDYL2 PE=2 SV=2 - [CDYL2 HUMAN]</a>                                  | 2,19  | 0,00 |
| Q8IZV5   | <a href="#">Retinol dehydrogenase 10 OS=Homo sapiens GN=RDH10 PE=1 SV=1 - [RDH10 HUMAN]</a>                                       | 2,12  | 0,00 |
| Q9UBW8   | <a href="#">COP9 signalosome complex subunit 7a OS=Homo sapiens GN=COPS7A PE=1 SV=1 - [CSN7A HUMAN]</a>                           | 1,70  | 0,00 |
| P07196   | <a href="#">Neurofilament light polypeptide OS=Homo sapiens GN=NEFL PE=1 SV=3 - [NFL HUMAN]</a>                                   | 7,16  | 0,00 |
| P32970   | <a href="#">CD70 antigen OS=Homo sapiens GN=CD70 PE=1 SV=2 - [CD70 HUMAN]</a>                                                     | 1,83  | 0,00 |
| Q969U6   | <a href="#">F-box/WD repeat-containing protein 5 OS=Homo sapiens GN=FBXW5 PE=1 SV=1 - [FBXW5 HUMAN]</a>                           | 1,97  | 0,00 |
| O15020-2 | <a href="#">Isoform 2 of Spectrin beta chain, brain 2 OS=Homo sapiens GN=SPTBN2 - [SPTN2 HUMAN]</a>                               | 2,06  | 0,00 |
| Q9H936   | <a href="#">Mitochondrial glutamate carrier 1 OS=Homo sapiens GN=SLC25A22 PE=1 SV=1 - [GHC1 HUMAN]</a>                            | 2,62  | 0,00 |
| Q9NQS3   | <a href="#">Poliovirus receptor-related protein 3 OS=Homo sapiens GN=PVRL3 PE=1 SV=1 - [PVRL3 HUMAN]</a>                          | 1,78  | 0,00 |
| Q02930-4 | <a href="#">Isoform 4 of Cyclic AMP-responsive element-binding protein 5 OS=Homo sapiens GN=CREB5 - [CREB5 HUMAN]</a>             | 1,88  | 0,00 |
| Q14160   | <a href="#">Protein scribble homolog OS=Homo sapiens GN=SCRIB PE=1 SV=4 - [SCRIB HUMAN]</a>                                       | 1,64  | 0,00 |
| Q5T5S1   | <a href="#">Uncharacterized coiled-coil domain-containing protein KIAA1984 OS=Homo sapiens GN=KIAA1984 PE=2 SV=3 - [K1984 HUI</a> | 41,46 | 0,00 |
| Q96K19-5 | <a href="#">Isoform 5 of RING finger protein 170 OS=Homo sapiens GN=RNF170 - [RN170 HUMAN]</a>                                    | 1,73  | 0,00 |
| Q08AF3   | <a href="#">Schlafen family member 5 OS=Homo sapiens GN=SLFN5 PE=1 SV=1 - [SLFN5 HUMAN]</a>                                       | 1,72  | 0,00 |
| Q9NSV4-1 | <a href="#">Isoform 1 of Protein diaphanous homolog 3 OS=Homo sapiens GN=DIAPH3 - [DIAP3 HUMAN]</a>                               | 1,83  | 0,00 |
| O95466   | <a href="#">Formin-like protein 1 OS=Homo sapiens GN=FMNL1 PE=1 SV=3 - [FMNL HUMAN]</a>                                           | 1,75  | 0,00 |
| Q9HBH0   | <a href="#">Rho-related GTP-binding protein RhoF OS=Homo sapiens GN=RHOF PE=2 SV=1 - [RHOF HUMAN]</a>                             | 20,55 | 0,00 |
| Q6SJ93   | <a href="#">Protein FAM111B OS=Homo sapiens GN=FAM111B PE=2 SV=1 - [F111B HUMAN]</a>                                              | 1,48  | 0,00 |
| Q8N3E9   | <a href="#">1-phosphatidylinositol-4,5-bisphosphate phosphodiesterase delta-3 OS=Homo sapiens GN=PLCD3 PE=1 SV=3 - [PLCD3 HUI</a> | 1,80  | 0,00 |
| Q8N4A0   | <a href="#">Polypeptide N-acetylgalactosaminyltransferase 4 OS=Homo sapiens GN=GALNT4 PE=1 SV=2 - [GALT4 HUMAN]</a>               | 1,68  | 0,00 |



## A375 vs. A375VR3

|          |                                                                                                                                |      |      |
|----------|--------------------------------------------------------------------------------------------------------------------------------|------|------|
| Q9NPH2-2 | <a href="#">Isoform 2 of Inositol-3-phosphate synthase 1 OS=Homo sapiens GN=ISYNA1 - [INO1 HUMAN]</a>                          | 2,34 | 0,00 |
| Q15746-4 | <a href="#">Isoform 3B of Myosin light chain kinase, smooth muscle OS=Homo sapiens GN=MYLK - [MYLK HUMAN]</a>                  | 1,69 | 0,00 |
| P0C2W1   | <a href="#">F-box/SPRY domain-containing protein 1 OS=Homo sapiens GN=FBXO45 PE=1 SV=1 - [FBSP1 HUMAN]</a>                     | 1,54 | 0,00 |
| Q9UIV1   | <a href="#">CCR4-NOT transcription complex subunit 7 OS=Homo sapiens GN=CNOT7 PE=1 SV=3 - [CNOT7 HUMAN]</a>                    | 1,42 | 0,00 |
| P20592   | <a href="#">Interferon-induced GTP-binding protein Mx2 OS=Homo sapiens GN=MX2 PE=1 SV=1 - [MX2 HUMAN]</a>                      | 1,45 | 0,00 |
| Q9NVH6-2 | <a href="#">Isoform B of Trimethyllysine dioxygenase, mitochondrial OS=Homo sapiens GN=TMLHE - [TMLH HUMAN]</a>                | 1,80 | 0,00 |
| Q0ZGT2-2 | <a href="#">Isoform 2 of Nexilin OS=Homo sapiens GN=NEXN - [NEXN HUMAN]</a>                                                    | 2,10 | 0,00 |
| O14639   | <a href="#">Actin-binding LIM protein 1 OS=Homo sapiens GN=ABLIM1 PE=1 SV=3 - [ABLIM1 HUMAN]</a>                               | 1,63 | 0,00 |
| P42785   | <a href="#">Lysosomal Pro-X carboxypeptidase OS=Homo sapiens GN=PRCP PE=1 SV=1 - [PCP HUMAN]</a>                               | 1,36 | 0,00 |
| A5D8V6   | <a href="#">Vacuolar protein sorting-associated protein 37C OS=Homo sapiens GN=VPS37C PE=1 SV=2 - [VP37C HUMAN]</a>            | 1,93 | 0,00 |
| O15479   | <a href="#">Melanoma-associated antigen B2 OS=Homo sapiens GN=MAGEB2 PE=1 SV=3 - [MAGB2 HUMAN]</a>                             | 2,28 | 0,00 |
| P29034   | <a href="#">Protein S100-A2 OS=Homo sapiens GN=S100A2 PE=1 SV=3 - [S10A2 HUMAN]</a>                                            | 2,89 | 0,00 |
| O15455   | <a href="#">Toll-like receptor 3 OS=Homo sapiens GN=TLR3 PE=1 SV=1 - [TLR3 HUMAN]</a>                                          | 1,77 | 0,00 |
| Q8IWS0   | <a href="#">PHD finger protein 6 OS=Homo sapiens GN=PHF6 PE=1 SV=1 - [PHF6 HUMAN]</a>                                          | 1,36 | 0,00 |
| P13987   | <a href="#">CD59 glycoprotein OS=Homo sapiens GN=CD59 PE=1 SV=1 - [CD59 HUMAN]</a>                                             | 1,96 | 0,00 |
| Q6PEV8-2 | <a href="#">Isoform 2 of Protein FAM199X OS=Homo sapiens GN=FAM199X - [F199X HUMAN]</a>                                        | 1,76 | 0,00 |
| Q14764   | <a href="#">Major vault protein OS=Homo sapiens GN=MVP PE=1 SV=4 - [MVP HUMAN]</a>                                             | 2,27 | 0,00 |
| P26006   | <a href="#">Integrin alpha-3 OS=Homo sapiens GN=ITGA3 PE=1 SV=5 - [ITA3 HUMAN]</a>                                             | 1,78 | 0,00 |
| O60763   | <a href="#">General vesicular transport factor p115 OS=Homo sapiens GN=USO1 PE=1 SV=2 - [USO1 HUMAN]</a>                       | 1,75 | 0,00 |
| O15344-2 | <a href="#">Isoform 2 of Midline-1 OS=Homo sapiens GN=MID1 - [TRI18 HUMAN]</a>                                                 | 1,65 | 0,00 |
| Q07157   | <a href="#">Tight junction protein ZO-1 OS=Homo sapiens GN=TJP1 PE=1 SV=3 - [ZO1 HUMAN]</a>                                    | 1,37 | 0,00 |
| Q9NY43   | <a href="#">BarH-like 2 homeobox protein OS=Homo sapiens GN=BARHL2 PE=2 SV=2 - [BARH2 HUMAN]</a>                               | 1,40 | 0,00 |
| Q9HBM0   | <a href="#">Vezatin OS=Homo sapiens GN=VEZT PE=1 SV=3 - [VEZA HUMAN]</a>                                                       | 1,63 | 0,00 |
| Q53EU6   | <a href="#">Glycerol-3-phosphate acyltransferase 3 OS=Homo sapiens GN=AGPAT9 PE=1 SV=2 - [GPAT3 HUMAN]</a>                     | 2,40 | 0,00 |
| Q13015   | <a href="#">Protein AF1q OS=Homo sapiens GN=MLLT11 PE=2 SV=1 - [AF1Q HUMAN]</a>                                                | 1,88 | 0,00 |
| Q8N4T8-2 | <a href="#">Isoform 2 of Carbonyl reductase family member 4 OS=Homo sapiens GN=CBR4 - [CBR4 HUMAN]</a>                         | 1,67 | 0,00 |
| Q96C92-4 | <a href="#">Isoform 4 of Serologically defined colon cancer antigen 3 OS=Homo sapiens GN=SDCCAG3 - [SDCG3 HUMAN]</a>           | 1,42 | 0,00 |
| O60831   | <a href="#">PRA1 family protein 2 OS=Homo sapiens GN=PRAF2 PE=1 SV=1 - [PRAF2 HUMAN]</a>                                       | 1,73 | 0,00 |
| P53365   | <a href="#">Arfaptin-2 OS=Homo sapiens GN=ARFIP2 PE=1 SV=1 - [ARFP2 HUMAN]</a>                                                 | 1,74 | 0,00 |
| Q8IZR5-3 | <a href="#">Isoform 3 of CKLF-like MARVEL transmembrane domain-containing protein 4 OS=Homo sapiens GN=CMTM4 - [CKLF4 HUM]</a> | 1,72 | 0,00 |
| Q9BSU3   | <a href="#">N-alpha-acetyltransferase 11 OS=Homo sapiens GN=NAA11 PE=1 SV=3 - [NAA11 HUMAN]</a>                                | 2,15 | 0,00 |
| O95816   | <a href="#">BAG family molecular chaperone regulator 2 OS=Homo sapiens GN=BAG2 PE=1 SV=1 - [BAG2 HUMAN]</a>                    | 1,56 | 0,00 |
| O43790   | <a href="#">Keratin, type II cuticular Hb6 OS=Homo sapiens GN=KRT86 PE=1 SV=1 - [KRT86 HUMAN]</a>                              | 1,45 | 0,00 |

## A375 vs. A375VR3

|          |                                                                                                                                     |      |      |
|----------|-------------------------------------------------------------------------------------------------------------------------------------|------|------|
| Q75051   | <a href="#">Plexin-A2 OS=Homo sapiens GN=PLXNA2 PE=1 SV=4 - [PLXA2 HUMAN]</a>                                                       | 2,00 | 0,00 |
| Q9UN86-2 | <a href="#">Isoform B of Ras GTPase-activating protein-binding protein 2 OS=Homo sapiens GN=G3BP2 - [G3BP2 HUMAN]</a>               | 1,52 | 0,00 |
| Q96B70   | <a href="#">Leukocyte receptor cluster member 9 OS=Homo sapiens GN=LENG9 PE=2 SV=2 - [LENG9 HUMAN]</a>                              | 2,17 | 0,00 |
| P11117   | <a href="#">Lysosomal acid phosphatase OS=Homo sapiens GN=ACP2 PE=1 SV=3 - [PPAL HUMAN]</a>                                         | 1,59 | 0,00 |
| Q9BUK0   | <a href="#">Coiled-coil-helix-coiled-coil-helix domain-containing protein 7 OS=Homo sapiens GN=CHCHD7 PE=2 SV=1 - [CHCH7 HUMAN]</a> | 1,74 | 0,00 |
| Q15149-8 | <a href="#">Isoform 8 of Plectin OS=Homo sapiens GN=PLEC - [PLEC HUMAN]</a>                                                         | 2,25 | 0,00 |
| Q9UK99-3 | <a href="#">Isoform 3 of F-box only protein 3 OS=Homo sapiens GN=FBXO3 - [FBX3 HUMAN]</a>                                           | 1,48 | 0,00 |
| Q5XG87   | <a href="#">DNA polymerase sigma OS=Homo sapiens GN=PAPD7 PE=1 SV=2 - [PAPD7 HUMAN]</a>                                             | 1,42 | 0,00 |
| P22570   | <a href="#">NADPH:adrenodoxin oxidoreductase, mitochondrial OS=Homo sapiens GN=FDXR PE=1 SV=3 - [ADRO HUMAN]</a>                    | 1,72 | 0,00 |
| Q00013   | <a href="#">55 kDa erythrocyte membrane protein OS=Homo sapiens GN=MPP1 PE=1 SV=2 - [EM55 HUMAN]</a>                                | 1,34 | 0,00 |
| Q92820   | <a href="#">Gamma-glutamyl hydrolase OS=Homo sapiens GN=GGH PE=1 SV=2 - [GGH HUMAN]</a>                                             | 1,44 | 0,00 |
| Q9UNW1   | <a href="#">Multiple inositol polyphosphate phosphatase 1 OS=Homo sapiens GN=MINPP1 PE=1 SV=1 - [MINP1 HUMAN]</a>                   | 1,91 | 0,00 |
| Q86UT6   | <a href="#">NLR family member X1 OS=Homo sapiens GN=NLRX1 PE=1 SV=1 - [NLRX1 HUMAN]</a>                                             | 2,04 | 0,00 |
| P42166   | <a href="#">Lamina-associated polypeptide 2, isoform alpha OS=Homo sapiens GN=TMPO PE=1 SV=2 - [LAP2A HUMAN]</a>                    | 1,67 | 0,00 |
| Q16531   | <a href="#">DNA damage-binding protein 1 OS=Homo sapiens GN=DDB1 PE=1 SV=1 - [DDB1 HUMAN]</a>                                       | 1,37 | 0,00 |
| O60427   | <a href="#">Fatty acid desaturase 1 OS=Homo sapiens GN=FADS1 PE=1 SV=1 - [FADS1 HUMAN]</a>                                          | 2,94 | 0,00 |
| P14210-6 | <a href="#">Isoform 6 of Hepatocyte growth factor OS=Homo sapiens GN=HGF - [HGF HUMAN]</a>                                          | 3,83 | 0,00 |
| Q14332   | <a href="#">Frizzled-2 OS=Homo sapiens GN=FZD2 PE=2 SV=1 - [FZD2 HUMAN]</a>                                                         | 1,58 | 0,00 |
| P02538   | <a href="#">Keratin, type II cytoskeletal 6A OS=Homo sapiens GN=KRT6A PE=1 SV=3 - [K2C6A HUMAN]</a>                                 | 6,68 | 0,00 |
| Q7L5N1   | <a href="#">COP9 signalosome complex subunit 6 OS=Homo sapiens GN=COPS6 PE=1 SV=1 - [CSN6 HUMAN]</a>                                | 1,40 | 0,00 |
| Q8N3V7-2 | <a href="#">Isoform 2 of Synaptopodin OS=Homo sapiens GN=SYNPO - [SYNPO HUMAN]</a>                                                  | 1,68 | 0,00 |
| Q13813   | <a href="#">Spectrin alpha chain, brain OS=Homo sapiens GN=SPTAN1 PE=1 SV=3 - [SPTA2 HUMAN]</a>                                     | 1,73 | 0,00 |
| Q8TEM1   | <a href="#">Nuclear pore membrane glycoprotein 210 OS=Homo sapiens GN=NUP210 PE=1 SV=3 - [PO210 HUMAN]</a>                          | 3,01 | 0,00 |
| A6NP61   | <a href="#">ZAR1-like protein OS=Homo sapiens GN=ZAR1L PE=2 SV=2 - [ZAR1L HUMAN]</a>                                                | 2,53 | 0,00 |
| Q8TB37-2 | <a href="#">Isoform 2 of Iron-sulfur protein NUBPL OS=Homo sapiens GN=NUBPL - [NUBPL HUMAN]</a>                                     | 1,62 | 0,00 |
| Q8IVF2-3 | <a href="#">Isoform 3 of Protein AHNK2 OS=Homo sapiens GN=AHNAK2 - [AHNAK2 HUMAN]</a>                                               | 1,46 | 0,00 |
| Q52LW3   | <a href="#">Rho GTPase-activating protein 29 OS=Homo sapiens GN=ARHGAP29 PE=1 SV=2 - [RHG29 HUMAN]</a>                              | 1,60 | 0,00 |
| Q15834   | <a href="#">Coiled-coil domain-containing protein 85B OS=Homo sapiens GN=CCDC85B PE=1 SV=2 - [CC85B HUMAN]</a>                      | 1,55 | 0,00 |
| P56199   | <a href="#">Integrin alpha-1 OS=Homo sapiens GN=ITGA1 PE=1 SV=2 - [ITA1 HUMAN]</a>                                                  | 1,91 | 0,00 |
| Q13825-2 | <a href="#">Isoform 2 of Methylglutaconyl-CoA hydratase, mitochondrial OS=Homo sapiens GN=AUH - [AUHM HUMAN]</a>                    | 1,50 | 0,00 |
| Q71RG4-3 | <a href="#">Isoform 3 of Transmembrane and ubiquitin-like domain-containing protein 2 OS=Homo sapiens GN=TMUB2 - [TMUB2 HUMAN]</a>  | 1,73 | 0,00 |
| P80723   | <a href="#">Brain acid soluble protein 1 OS=Homo sapiens GN=BASP1 PE=1 SV=2 - [BASP1 HUMAN]</a>                                     | 3,01 | 0,00 |
| P04004   | <a href="#">Vitronectin OS=Homo sapiens GN=VTN PE=1 SV=1 - [VTNC HUMAN]</a>                                                         | 2,61 | 0,00 |

### A375 vs. A375VR3

|          |                                                                                                                                      |      |      |
|----------|--------------------------------------------------------------------------------------------------------------------------------------|------|------|
| P40200-2 | <a href="#">Isoform 2 of T-cell surface protein tactile OS=Homo sapiens GN=CD96 - [TACT_HUMAN]</a>                                   | 2,05 | 0,00 |
| P49748-2 | <a href="#">Isoform 2 of Very long-chain specific acyl-CoA dehydrogenase, mitochondrial OS=Homo sapiens GN=ACADVL - [ACADV_HUI]</a>  | 1,54 | 0,00 |
| O75386   | <a href="#">Tubby-related protein 3 OS=Homo sapiens GN=TULP3 PE=1 SV=2 - [TULP3_HUMAN]</a>                                           | 1,36 | 0,00 |
| Q99653   | <a href="#">Calcium-binding protein p22 OS=Homo sapiens GN=CHP PE=1 SV=3 - [CHP1_HUMAN]</a>                                          | 1,67 | 0,00 |
| Q9Y4K1   | <a href="#">Absent in melanoma 1 protein OS=Homo sapiens GN=AIM1 PE=1 SV=3 - [AIM1_HUMAN]</a>                                        | 1,50 | 0,33 |
| O95772-2 | <a href="#">Isoform 2 of MLN64 N-terminal domain homolog OS=Homo sapiens GN=STARD3NL - [MENTO_HUMAN]</a>                             | 2,05 | 0,33 |
| P08581   | <a href="#">Hepatocyte growth factor receptor OS=Homo sapiens GN=MET PE=1 SV=4 - [MET_HUMAN]</a>                                     | 1,77 | 0,33 |
| O60907-2 | <a href="#">Isoform 2 of F-box-like/WD repeat-containing protein TBL1X OS=Homo sapiens GN=TBL1X - [TBL1X_HUMAN]</a>                  | 1,55 | 0,33 |
| Q9H8Y8-2 | <a href="#">Isoform 2 of Golgi reassembly-stacking protein 2 OS=Homo sapiens GN=GORASP2 - [GORS2_HUMAN]</a>                          | 1,33 | 0,33 |
| Q96EQ0   | <a href="#">Small glutamine-rich tetratricopeptide repeat-containing protein beta OS=Homo sapiens GN=SGTB PE=1 SV=1 - [SGTB_HUN]</a> | 1,45 | 0,33 |
| O94766   | <a href="#">Galactosylgalactosylxylosylprotein 3-beta-glucuronosyltransferase 3 OS=Homo sapiens GN=B3GAT3 PE=1 SV=2 - [B3GA3_H]</a>  | 2,22 | 0,33 |
| P50895   | <a href="#">Basal cell adhesion molecule OS=Homo sapiens GN=BCAM PE=1 SV=2 - [BCAM_HUMAN]</a>                                        | 1,62 | 0,33 |
| Q8IY33-3 | <a href="#">Isoform 3 of MICAL-like protein 2 OS=Homo sapiens GN=MICALL2 - [MILK2_HUMAN]</a>                                         | 1,44 | 0,33 |
| O60220   | <a href="#">Mitochondrial import inner membrane translocase subunit Tim8 A OS=Homo sapiens GN=TIMM8A PE=1 SV=1 - [TIM8A_HL]</a>      | 1,82 | 0,33 |
| Q13488   | <a href="#">V-type proton ATPase 116 kDa subunit a isoform 3 OS=Homo sapiens GN=TCIRG1 PE=1 SV=3 - [VPP3_HUMAN]</a>                  | 1,53 | 0,33 |
| P84095   | <a href="#">Rho-related GTP-binding protein RhoG OS=Homo sapiens GN=RHOG PE=1 SV=1 - [RHOG_HUMAN]</a>                                | 1,72 | 0,33 |
| Q9BW91-2 | <a href="#">Isoform 2 of ADP-ribose pyrophosphatase, mitochondrial OS=Homo sapiens GN=NUDT9 - [NUDT9_HUMAN]</a>                      | 1,60 | 0,33 |
| Q5QP82-2 | <a href="#">Isoform 2 of DDB1- and CUL4-associated factor 10 OS=Homo sapiens GN=DCAF10 - [DCA10_HUMAN]</a>                           | 1,51 | 0,33 |
| Q92985-3 | <a href="#">Isoform C of Interferon regulatory factor 7 OS=Homo sapiens GN=IRF7 - [IRF7_HUMAN]</a>                                   | 1,57 | 0,33 |
| P43353-2 | <a href="#">Isoform 2 of Aldehyde dehydrogenase family 3 member B1 OS=Homo sapiens GN=ALDH3B1 - [AL3B1_HUMAN]</a>                    | 2,12 | 0,33 |
| P26885   | <a href="#">Peptidyl-prolyl cis-trans isomerase FKBP2 OS=Homo sapiens GN=FKBP2 PE=1 SV=2 - [FKBP2_HUMAN]</a>                         | 1,79 | 0,33 |
| P51828   | <a href="#">Adenylate cyclase type 7 OS=Homo sapiens GN=ADCY7 PE=2 SV=1 - [ADCY7_HUMAN]</a>                                          | 1,44 | 0,33 |
| Q9UQ03-2 | <a href="#">Isoform 2 of Coronin-2B OS=Homo sapiens GN=CORO2B - [COR2B_HUMAN]</a>                                                    | 1,43 | 0,33 |
| Q01650   | <a href="#">Large neutral amino acids transporter small subunit 1 OS=Homo sapiens GN=SLC7A5 PE=1 SV=2 - [LAT1_HUMAN]</a>             | 1,78 | 0,33 |
| Q13938   | <a href="#">Calcyphosin OS=Homo sapiens GN=CAPS PE=1 SV=1 - [CAYP1_HUMAN]</a>                                                        | 6,80 | 0,33 |
| Q15526-2 | <a href="#">Isoform 2 of Surfeit locus protein 1 OS=Homo sapiens GN=SURF1 - [SURF1_HUMAN]</a>                                        | 2,06 | 0,33 |
| Q96RT1-7 | <a href="#">Isoform 7 of Protein LAP2 OS=Homo sapiens GN=ERBB2IP - [LAP2_HUMAN]</a>                                                  | 1,40 | 0,33 |
| Q16877   | <a href="#">6-phosphofructo-2-kinase/fructose-2,6-biphosphatase 4 OS=Homo sapiens GN=PFKFB4 PE=2 SV=6 - [F264_HUMAN]</a>             | 1,32 | 0,33 |
| P52758   | <a href="#">Ribonuclease UK114 OS=Homo sapiens GN=HRSP12 PE=1 SV=1 - [UK114_HUMAN]</a>                                               | 1,60 | 0,33 |
| Q8NBJ7-2 | <a href="#">Isoform 2 of Sulfatase-modifying factor 2 OS=Homo sapiens GN=SUMF2 - [SUMF2_HUMAN]</a>                                   | 1,57 | 0,33 |
| O60716-5 | <a href="#">Isoform 1A of Catenin delta-1 OS=Homo sapiens GN=CTNND1 - [CTND1_HUMAN]</a>                                              | 1,29 | 0,33 |
| Q9NZI8   | <a href="#">Insulin-like growth factor 2 mRNA-binding protein 1 OS=Homo sapiens GN=IGF2BP1 PE=1 SV=2 - [IF2B1_HUMAN]</a>             | 1,53 | 0,33 |
| Q9HBH5   | <a href="#">Retinol dehydrogenase 14 OS=Homo sapiens GN=RDH14 PE=1 SV=1 - [RDH14_HUMAN]</a>                                          | 1,69 | 0,33 |

## A375 vs. A375VR3

|                |                                                                                                                                  |                    |                   |
|----------------|----------------------------------------------------------------------------------------------------------------------------------|--------------------|-------------------|
| P79522-2       | <a href="#">Isoform 2 of Proline-rich protein 3 OS=Homo sapiens GN=PRR3 - [PRR3 HUMAN]</a>                                       | 1,41               | 0,33              |
| P50222         | <a href="#">Homeobox protein MOX-2 OS=Homo sapiens GN=MEOX2 PE=1 SV=2 - [MEOX2 HUMAN]</a>                                        | 1,71               | 0,33              |
| Q96C36         | <a href="#">Pyrroline-5-carboxylate reductase 2 OS=Homo sapiens GN=PYCR2 PE=1 SV=1 - [P5CR2 HUMAN]</a>                           | 1,68               | 0,33              |
| P29279-2       | <a href="#">Isoform 2 of Connective tissue growth factor OS=Homo sapiens GN=CTGF - [CTGF HUMAN]</a>                              | 1,67               | 0,33              |
| Q12959-4       | <a href="#">Isoform 4 of Disks large homolog 1 OS=Homo sapiens GN=DLG1 - [DLG1 HUMAN]</a>                                        | 1,46               | 0,33              |
| P0C7T5         | <a href="#">Ataxin-1-like OS=Homo sapiens GN=ATXN1L PE=1 SV=1 - [ATX1L HUMAN]</a>                                                | 1,36               | 0,33              |
| Q9UPQ8         | <a href="#">Dolichol kinase OS=Homo sapiens GN=DOLK PE=1 SV=1 - [DOLK HUMAN]</a>                                                 | 1,82               | 0,33              |
| Q8NHG7         | <a href="#">Small VCP/p97-interacting protein OS=Homo sapiens GN=SVIP PE=2 SV=1 - [SVIP HUMAN]</a>                               | 1,52               | 0,33              |
| Q9NTG7         | <a href="#">NAD-dependent deacetylase sirtuin-3, mitochondrial OS=Homo sapiens GN=SIRT3 PE=1 SV=2 - [SIRT3 HUMAN]</a>            | 1,63               | 0,33              |
| Q96P48-5       | <a href="#">Isoform 5 of Arf-GAP with Rho-GAP domain, ANK repeat and PH domain-containing protein 1 OS=Homo sapiens GN=ARAP1</a> | 1,94               | 0,33              |
| O00622         | <a href="#">Protein CYR61 OS=Homo sapiens GN=CYR61 PE=1 SV=1 - [CYR61 HUMAN]</a>                                                 | 1,96               | 0,33              |
| Q96SW2-2       | <a href="#">Isoform 2 of Protein cereblon OS=Homo sapiens GN=CRBN - [CRBN HUMAN]</a>                                             | 1,89               | 0,33              |
| P30044-2       | <a href="#">Isoform Cytoplasmic+peroxisomal of Peroxiredoxin-5, mitochondrial OS=Homo sapiens GN=PRDX5 - [PRDX5 HUMAN]</a>       | 1,33               | 0,33              |
| O14686         | <a href="#">Histone-lysine N-methyltransferase MLL2 OS=Homo sapiens GN=MLL2 PE=1 SV=2 - [MLL2 HUMAN]</a>                         | 1,61               | 0,33              |
| Q9BQ69         | <a href="#">MACRO domain-containing protein 1 OS=Homo sapiens GN=MACROD1 PE=1 SV=2 - [MACD1 HUMAN]</a>                           | 1,38               | 0,33              |
| Q9H3Q1         | <a href="#">Cdc42 effector protein 4 OS=Homo sapiens GN=CDC42EP4 PE=1 SV=1 - [BORG4 HUMAN]</a>                                   | 1,67               | 0,33              |
| Q9UHL4         | <a href="#">Dipeptidyl peptidase 2 OS=Homo sapiens GN=DPP7 PE=1 SV=3 - [DPP2 HUMAN]</a>                                          | 1,35               | 0,33              |
| Q9Y2H1         | <a href="#">Serine/threonine-protein kinase 38-like OS=Homo sapiens GN=STK38L PE=1 SV=3 - [ST38L HUMAN]</a>                      | 1,72               | 0,33              |
| Q14534         | <a href="#">Squalene monooxygenase OS=Homo sapiens GN=SQLE PE=2 SV=3 - [ERG1 HUMAN]</a>                                          | 1,57               | 0,33              |
| Q8WUK0-2       | <a href="#">Isoform 2 of Protein-tyrosine phosphatase mitochondrial 1 OS=Homo sapiens GN=PTPMT1 - [PTPM1 HUMAN]</a>              | 1,74               | 0,33              |
| O00488         | <a href="#">Zinc finger protein 593 OS=Homo sapiens GN=ZNF593 PE=1 SV=2 - [ZN593 HUMAN]</a>                                      | 1,41               | 0,33              |
| Q9BRU9         | <a href="#">rRNA-processing protein UTP23 homolog OS=Homo sapiens GN=UTP23 PE=2 SV=2 - [UTP23 HUMAN]</a>                         | 1,37               | 0,33              |
| P78358-2       | <a href="#">Isoform 2 of Cancer/testis antigen 1 OS=Homo sapiens GN=CTAG1A - [CTG1B HUMAN]</a>                                   | 1,42               | 0,33              |
| Q9BSM1-3       | <a href="#">Isoform 2 of Polycomb group RING finger protein 1 OS=Homo sapiens GN=PCGF1 - [PCGF1 HUMAN]</a>                       | 1,85               | 0,33              |
| Q9BSD7         | <a href="#">Cancer-related nucleoside-triphosphatase OS=Homo sapiens GN=NTPCR PE=1 SV=1 - [NTPCR HUMAN]</a>                      | 1,51               | 0,33              |
| Q3KR37-2       | <a href="#">Isoform 2 of GRAM domain-containing protein 1B OS=Homo sapiens GN=GRAMD1B - [GRM1B HUMAN]</a>                        | 1,80               | 0,33              |
| Q5JTD0-2       | <a href="#">Isoform 2 of Tight junction-associated protein 1 OS=Homo sapiens GN=TJAP1 - [TJAP1 HUMAN]</a>                        | 1,63               | 0,33              |
| Q96RS6         | <a href="#">NudC domain-containing protein 1 OS=Homo sapiens GN=NUDC1 PE=1 SV=2 - [NUDC1 HUMAN]</a>                              | 1,54               | 0,33              |
| O00469-2       | <a href="#">Isoform 2 of Procollagen-lysine,2-oxoglutarate 5-dioxygenase 2 OS=Homo sapiens GN=PLOD2 - [PLOD2 HUMAN]</a>          | 1,46               | 0,33              |
| P08195         | <a href="#">4F2 cell-surface antigen heavy chain OS=Homo sapiens GN=SLC3A2 PE=1 SV=3 - [4F2 HUMAN]</a>                           | 1,63               | 0,33              |
| Q9H568         | <a href="#">Actin-like protein 8 OS=Homo sapiens GN=ACTL8 PE=2 SV=1 - [ACTL8 HUMAN]</a>                                          | 2,28               | 0,33              |
| Q53EL6         | <a href="#">Programmed cell death protein 4 OS=Homo sapiens GN=PDCD4 PE=1 SV=2 - [PDCD4 HUMAN]</a>                               | 1,69               | 0,33              |
| <b>Gene ID</b> | <b>Gene Name</b>                                                                                                                 | <b>Fold Change</b> | <b>q-value(%)</b> |

### A375 vs. A375VR3

|          |                                                                                                                                  |      |      |
|----------|----------------------------------------------------------------------------------------------------------------------------------|------|------|
| Q9UHT9   | <a href="#">Putative uncharacterized protein PRO1768 OS=Homo sapiens GN=PRO1768 PE=5 SV=1 - [YN005 HUMAN]</a>                    | 0,51 | 0,00 |
| Q96RW7-2 | <a href="#">Isoform 2 of Hemicentin-1 OS=Homo sapiens GN=HMCN1 - [HMCN1 HUMAN]</a>                                               | 0,60 | 0,00 |
| Q96MK3   | <a href="#">Protein FAM20A OS=Homo sapiens GN=FAM20A PE=1 SV=4 - [FA20A HUMAN]</a>                                               | 0,57 | 0,00 |
| Q92626   | <a href="#">Peroxidasin homolog OS=Homo sapiens GN=PXDN PE=1 SV=2 - [PXDN HUMAN]</a>                                             | 0,60 | 0,00 |
| P98196   | <a href="#">Probable phospholipid-transporting ATPase IH OS=Homo sapiens GN=ATP11A PE=2 SV=3 - [AT11A HUMAN]</a>                 | 0,65 | 0,00 |
| Q8N5Z5-2 | <a href="#">Isoform 2 of BTB/POZ domain-containing protein KCTD17 OS=Homo sapiens GN=KCTD17 - [KCD17 HUMAN]</a>                  | 0,65 | 0,00 |
| Q9H4M7   | <a href="#">Pleckstrin homology domain-containing family A member 4 OS=Homo sapiens GN=PLEKHA4 PE=1 SV=2 - [PKHA4 HUMAN]</a>     | 0,67 | 0,00 |
| Q6ZNJ1-4 | <a href="#">Isoform 4 of Neurobeachin-like protein 2 OS=Homo sapiens GN=NBEAL2 - [NBEL2 HUMAN]</a>                               | 0,68 | 0,00 |
| Q96HQ2   | <a href="#">CDKN2AIP N-terminal-like protein OS=Homo sapiens GN=CDKN2AIPNL PE=1 SV=1 - [C2AIL HUMAN]</a>                         | 0,65 | 0,00 |
| Q14644   | <a href="#">Ras GTPase-activating protein 3 OS=Homo sapiens GN=RASA3 PE=1 SV=3 - [RASA3 HUMAN]</a>                               | 0,65 | 0,00 |
| P46013-2 | <a href="#">Isoform Short of Antigen KI-67 OS=Homo sapiens GN=MKI67 - [KI67 HUMAN]</a>                                           | 0,69 | 0,00 |
| P24557   | <a href="#">Thromboxane-A synthase OS=Homo sapiens GN=TBXAS1 PE=1 SV=3 - [THAS HUMAN]</a>                                        | 0,59 | 0,00 |
| Q9HA77   | <a href="#">Probable cysteine--tRNA ligase, mitochondrial OS=Homo sapiens GN=CARS2 PE=1 SV=1 - [SYCM HUMAN]</a>                  | 0,68 | 0,00 |
| P09471-2 | <a href="#">Isoform Alpha-2 of Guanine nucleotide-binding protein G(o) subunit alpha OS=Homo sapiens GN=GNAO1 - [GNAO HUMAN]</a> | 0,66 | 0,00 |
| P16112-3 | <a href="#">Isoform 3 of Aggrecan core protein OS=Homo sapiens GN=ACAN - [PGCA HUMAN]</a>                                        | 0,63 | 0,00 |
| Q7L311   | <a href="#">Armadillo repeat-containing X-linked protein 2 OS=Homo sapiens GN=ARMCX2 PE=2 SV=1 - [ARMX2 HUMAN]</a>               | 0,66 | 0,00 |
| Q8NI37   | <a href="#">Protein phosphatase PTC7 homolog OS=Homo sapiens GN=PPTC7 PE=2 SV=1 - [PPTC7 HUMAN]</a>                              | 0,68 | 0,00 |
| Q9P2F8   | <a href="#">Signal-induced proliferation-associated 1-like protein 2 OS=Homo sapiens GN=SIPA1L2 PE=1 SV=2 - [SI1L2 HUMAN]</a>    | 0,74 | 0,00 |
| P06858   | <a href="#">Lipoprotein lipase OS=Homo sapiens GN=LPL PE=1 SV=1 - [LIPL HUMAN]</a>                                               | 0,59 | 0,00 |
| Q8WY21-3 | <a href="#">Isoform 3 of VPS10 domain-containing receptor SorCS1 OS=Homo sapiens GN=SORCS1 - [SORC1 HUMAN]</a>                   | 0,62 | 0,00 |
| Q9H246   | <a href="#">Uncharacterized protein C1orf21 OS=Homo sapiens GN=C1orf21 PE=1 SV=1 - [CA021 HUMAN]</a>                             | 0,70 | 0,00 |
| P20336   | <a href="#">Ras-related protein Rab-3A OS=Homo sapiens GN=RAB3A PE=1 SV=1 - [RAB3A HUMAN]</a>                                    | 0,68 | 0,00 |
| Q9NS69   | <a href="#">Mitochondrial import receptor subunit TOM22 homolog OS=Homo sapiens GN=TOMM22 PE=1 SV=3 - [TOM22 HUMAN]</a>          | 0,53 | 0,00 |
| P15907   | <a href="#">Beta-galactoside alpha-2,6-sialyltransferase 1 OS=Homo sapiens GN=ST6GAL1 PE=1 SV=1 - [SIAT1 HUMAN]</a>              | 0,65 | 0,00 |
| Q96AH8   | <a href="#">Ras-related protein Rab-7b OS=Homo sapiens GN=RAB7B PE=2 SV=1 - [RAB7B HUMAN]</a>                                    | 0,59 | 0,00 |
| Q9Y4D1-2 | <a href="#">Isoform 2 of Disheveled-associated activator of morphogenesis 1 OS=Homo sapiens GN=DAAM1 - [DAAM1 HUMAN]</a>         | 0,70 | 0,00 |
| O94832   | <a href="#">Myosin-IId OS=Homo sapiens GN=MYO1D PE=1 SV=2 - [MYO1D HUMAN]</a>                                                    | 0,67 | 0,00 |
| Q86TV6   | <a href="#">Tetratricopeptide repeat protein 7B OS=Homo sapiens GN=TTC7B PE=1 SV=3 - [TTC7B HUMAN]</a>                           | 0,50 | 0,00 |
| Q9ULX9   | <a href="#">Transcription factor MafF OS=Homo sapiens GN=MAFF PE=1 SV=2 - [MAFF HUMAN]</a>                                       | 0,70 | 0,37 |
| Q96C34-2 | <a href="#">Isoform 2 of RUN domain-containing protein 1 OS=Homo sapiens GN=RUNDC1 - [RUND1 HUMAN]</a>                           | 0,75 | 0,37 |
| P13612   | <a href="#">Integrin alpha-4 OS=Homo sapiens GN=ITGA4 PE=1 SV=3 - [ITA4 HUMAN]</a>                                               | 0,75 | 0,37 |
| P80404   | <a href="#">4-aminobutyrate aminotransferase, mitochondrial OS=Homo sapiens GN=ABAT PE=1 SV=3 - [GABT HUMAN]</a>                 | 0,68 | 0,37 |
| Q6UX07-2 | <a href="#">Isoform 2 of Dehydrogenase/reductase SDR family member 13 OS=Homo sapiens GN=DHRS13 - [DHR13 HUMAN]</a>              | 0,70 | 0,37 |

### A375 vs. A375VR3

|          |                                                                                                                                    |      |      |
|----------|------------------------------------------------------------------------------------------------------------------------------------|------|------|
| Q14331   | <a href="#">Protein FRG1 OS=Homo sapiens GN=FRG1 PE=1 SV=1 - [FRG1_HUMAN]</a>                                                      | 0,77 | 0,37 |
| P20265-3 | <a href="#">Isoform N-OCT 5B of POU domain, class 3, transcription factor 2 OS=Homo sapiens GN=POU3F2 - [PO3F2_HUMAN]</a>          | 0,67 | 0,37 |
| Q9H079   | <a href="#">Uncharacterized protein C15orf29 OS=Homo sapiens GN=C15orf29 PE=2 SV=1 - [CO029_HUMAN]</a>                             | 0,73 | 0,37 |
| Q86T65   | <a href="#">Disheveled-associated activator of morphogenesis 2 OS=Homo sapiens GN=DAAM2 PE=2 SV=3 - [DAAM2_HUMAN]</a>              | 0,67 | 0,37 |
| O75600   | <a href="#">2-amino-3-ketobutyrate coenzyme A ligase, mitochondrial OS=Homo sapiens GN=GCAT PE=2 SV=1 - [KBL_HUMAN]</a>            | 0,70 | 0,37 |
| Q14699   | <a href="#">Raftlin OS=Homo sapiens GN=RFTN1 PE=1 SV=4 - [RFTN1_HUMAN]</a>                                                         | 0,70 | 0,37 |
| O96020   | <a href="#">G1/S-specific cyclin-E2 OS=Homo sapiens GN=CCNE2 PE=1 SV=1 - [CCNE2_HUMAN]</a>                                         | 0,74 | 0,37 |
| Q86XN7   | <a href="#">Proline and serine-rich protein 1 OS=Homo sapiens GN=PROSER1 PE=1 SV=2 - [PRSR1_HUMAN]</a>                             | 0,75 | 0,37 |
| Q5JWF2   | <a href="#">Guanine nucleotide-binding protein G(s) subunit alpha isoforms XLas OS=Homo sapiens GN=GNAS PE=1 SV=2 - [GNAS1_HU]</a> | 0,73 | 0,37 |
| P51587   | <a href="#">Breast cancer type 2 susceptibility protein OS=Homo sapiens GN=BRCA2 PE=1 SV=2 - [BRCA2_HUMAN]</a>                     | 0,76 | 0,37 |
| Q08174-2 | <a href="#">Isoform 2 of Protocadherin-1 OS=Homo sapiens GN=PCDH1 - [PCDH1_HUMAN]</a>                                              | 0,67 | 0,37 |
| P08294   | <a href="#">Extracellular superoxide dismutase [Cu-Zn] OS=Homo sapiens GN=SOD3 PE=1 SV=2 - [SODE_HUMAN]</a>                        | 0,67 | 0,37 |
| Q08431-3 | <a href="#">Isoform 3 of Lactadherin OS=Homo sapiens GN=MFGE8 - [MFGM_HUMAN]</a>                                                   | 0,66 | 0,37 |

## A375 vs. A375VR4

| Gene ID  | Gene Name                                                                                                                       | Fold Change | q-value(%) |
|----------|---------------------------------------------------------------------------------------------------------------------------------|-------------|------------|
| Q9Y446   | <a href="#">Plakophilin-3 OS=Homo sapiens GN=PKP3 PE=1 SV=1 - [PKP3_HUMAN]</a>                                                  | 45,51       | 0,00       |
| O60732   | <a href="#">Melanoma-associated antigen C1 OS=Homo sapiens GN=MAGEC1 PE=1 SV=3 - [MAGC1_HUMAN]</a>                              | 1283,76     | 0,00       |
| P20337   | <a href="#">Ras-related protein Rab-3B OS=Homo sapiens GN=RAB3B PE=1 SV=2 - [RAB3B_HUMAN]</a>                                   | 6,97        | 0,00       |
| Q99959-2 | <a href="#">Isoform 1 of Plakophilin-2 OS=Homo sapiens GN=PKP2 - [PKP2_HUMAN]</a>                                               | 10,32       | 0,00       |
| Q9P2K5-2 | <a href="#">Isoform 2 of Myelin expression factor 2 OS=Homo sapiens GN=MYEF2 - [MYEF2_HUMAN]</a>                                | 7,94        | 0,00       |
| Q01543-2 | <a href="#">Isoform 2 of Friend leukemia integration 1 transcription factor OS=Homo sapiens GN=FLI1 - [FLI1_HUMAN]</a>          | 6,04        | 0,00       |
| Q96Q89-4 | <a href="#">Isoform 4 of Kinesin-like protein KIF20B OS=Homo sapiens GN=KIF20B - [KI20B_HUMAN]</a>                              | 18,14       | 0,00       |
| Q6KB66-2 | <a href="#">Isoform 2 of Keratin, type II cytoskeletal 80 OS=Homo sapiens GN=KRT80 - [K2C80_HUMAN]</a>                          | 12,54       | 0,00       |
| O75525-2 | <a href="#">Isoform 2 of KH domain-containing, RNA-binding, signal transduction-associated protein 3 OS=Homo sapiens GN=KHI</a> | 15,96       | 0,00       |
| P16144-4 | <a href="#">Isoform Beta-4D of Integrin beta-4 OS=Homo sapiens GN=ITGB4 - [ITB4_HUMAN]</a>                                      | 57323,07    | 0,00       |
| P05787   | <a href="#">Keratin, type II cytoskeletal 8 OS=Homo sapiens GN=KRT8 PE=1 SV=7 - [K2C8_HUMAN]</a>                                | 192,03      | 0,00       |
| Q9H6F2   | <a href="#">Trimeric intracellular cation channel type A OS=Homo sapiens GN=TMEM38A PE=1 SV=1 - [TM38A_HUMAN]</a>               | 4,81        | 0,00       |
| Q99608   | <a href="#">Necdin OS=Homo sapiens GN=NDN PE=2 SV=1 - [NECD_HUMAN]</a>                                                          | 6,78        | 0,00       |
| Q16270   | <a href="#">Insulin-like growth factor-binding protein 7 OS=Homo sapiens GN=IGFBP7 PE=1 SV=1 - [IBP7_HUMAN]</a>                 | 5,89        | 0,00       |
| Q8IWR1   | <a href="#">Tripartite motif-containing protein 59 OS=Homo sapiens GN=TRIM59 PE=2 SV=1 - [TRI59_HUMAN]</a>                      | 3,50        | 0,00       |
| Q6ZUT6   | <a href="#">Uncharacterized protein C15orf52 OS=Homo sapiens GN=C15orf52 PE=1 SV=1 - [CO052_HUMAN]</a>                          | 2,05        | 0,00       |
| Q9Y2T3   | <a href="#">Guanine deaminase OS=Homo sapiens GN=GDA PE=1 SV=1 - [GUAD_HUMAN]</a>                                               | 907,34      | 0,00       |
| Q9BRK0   | <a href="#">Receptor expression-enhancing protein 2 OS=Homo sapiens GN=REEP2 PE=2 SV=2 - [REEP2_HUMAN]</a>                      | 3,08        | 0,00       |
| P13284   | <a href="#">Gamma-interferon-inducible lysosomal thiol reductase OS=Homo sapiens GN=IFI30 PE=1 SV=3 - [GILT_HUMAN]</a>          | 2,67        | 0,00       |
| P20138   | <a href="#">Myeloid cell surface antigen CD33 OS=Homo sapiens GN=CD33 PE=1 SV=2 - [CD33_HUMAN]</a>                              | 23,91       | 0,00       |
| Q92506   | <a href="#">Estradiol 17-beta-dehydrogenase 8 OS=Homo sapiens GN=HSD17B8 PE=1 SV=2 - [DHB8_HUMAN]</a>                           | 2,87        | 0,00       |
| O15479   | <a href="#">Melanoma-associated antigen B2 OS=Homo sapiens GN=MAGEB2 PE=1 SV=3 - [MAGB2_HUMAN]</a>                              | 2,96        | 0,00       |
| P56817-4 | <a href="#">Isoform D of Beta-secretase 1 OS=Homo sapiens GN=BACE1 - [BACE1_HUMAN]</a>                                          | 5,93        | 0,00       |
| P80723   | <a href="#">Brain acid soluble protein 1 OS=Homo sapiens GN=BASP1 PE=1 SV=2 - [BASP1_HUMAN]</a>                                 | 31,11       | 0,00       |
| Q9NUL3-3 | <a href="#">Isoform 3 of Double-stranded RNA-binding protein Staufen homolog 2 OS=Homo sapiens GN=STAU2 - [STAU2_HUMAN]</a>     | 1,85        | 0,00       |
| P32189-1 | <a href="#">Isoform 1 of Glycerol kinase OS=Homo sapiens GN=GK - [GLPK_HUMAN]</a>                                               | 5,43        | 0,00       |
| P56199   | <a href="#">Integrin alpha-1 OS=Homo sapiens GN=ITGA1 PE=1 SV=2 - [ITA1_HUMAN]</a>                                              | 2,57        | 0,00       |
| Q9NS25   | <a href="#">Sperm protein associated with the nucleus on the X chromosome B/F OS=Homo sapiens GN=SPANXB1 PE=2 SV=1 - [S</a>     | 98,67       | 0,00       |
| Q9UKU6   | <a href="#">Thyrotropin-releasing hormone-degrading ectoenzyme OS=Homo sapiens GN=TRHDE PE=2 SV=1 - [TRHDE_HUMAN]</a>           | 813,03      | 0,00       |
| P26022   | <a href="#">Pentraxin-related protein PTX3 OS=Homo sapiens GN=PTX3 PE=1 SV=3 - [PTX3_HUMAN]</a>                                 | 9,13        | 0,00       |
| P29317   | <a href="#">Ephrin type-A receptor 2 OS=Homo sapiens GN=EPHA2 PE=1 SV=2 - [EPHA2_HUMAN]</a>                                     | 16,50       | 0,00       |
| O94851-2 | <a href="#">Isoform 2 of Protein MICAL-2 OS=Homo sapiens GN=MICAL2 - [MICA2_HUMAN]</a>                                          | 7,13        | 0,00       |

## A375 vs. A375VR4

|          |                                                                                                                                 |          |      |
|----------|---------------------------------------------------------------------------------------------------------------------------------|----------|------|
| Q92466-2 | <a href="#">Isoform D1 of DNA damage-binding protein 2 OS=Homo sapiens GN=DDB2 - [DDB2 HUMAN]</a>                               | 4,40     | 0,00 |
| Q9H4G0-4 | <a href="#">Isoform 4 of Band 4,1-like protein 1 OS=Homo sapiens GN=EPB41L1 - [E41L1 HUMAN]</a>                                 | 5,06     | 0,00 |
| P82970   | <a href="#">High mobility group nucleosome-binding domain-containing protein 5 OS=Homo sapiens GN=HMGN5 PE=1 SV=1 - [H</a>      | 32,20    | 0,00 |
| Q9UHW9-6 | <a href="#">Isoform 6 of Solute carrier family 12 member 6 OS=Homo sapiens GN=SLC12A6 - [S12A6 HUMAN]</a>                       | 5,01     | 0,00 |
| P10620   | <a href="#">Microsomal glutathione S-transferase 1 OS=Homo sapiens GN=MGST1 PE=1 SV=1 - [MGST1 HUMAN]</a>                       | 27392,53 | 0,00 |
| Q9UJY1   | <a href="#">Heat shock protein beta-8 OS=Homo sapiens GN=HSPB8 PE=1 SV=1 - [HSPB8 HUMAN]</a>                                    | 1,75     | 0,00 |
| Q8WUR7   | <a href="#">UPF0235 protein C15orf40 OS=Homo sapiens GN=C15orf40 PE=1 SV=1 - [CO040 HUMAN]</a>                                  | 1,91     | 0,00 |
| Q7Z7L1   | <a href="#">Schlafen family member 11 OS=Homo sapiens GN=SLFN11 PE=1 SV=2 - [SLN11 HUMAN]</a>                                   | 6,08     | 0,00 |
| P43155-2 | <a href="#">Isoform 2 of Carnitine O-acetyltransferase OS=Homo sapiens GN=CRAT - [CACP HUMAN]</a>                               | 2,32     | 0,00 |
| Q17RY6   | <a href="#">Lymphocyte antigen 6K OS=Homo sapiens GN=LY6K PE=1 SV=2 - [LY6K HUMAN]</a>                                          | 19,49    | 0,00 |
| P40200-2 | <a href="#">Isoform 2 of T-cell surface protein tactile OS=Homo sapiens GN=CD96 - [TACT HUMAN]</a>                              | 5,46     | 0,00 |
| Q9HBH0   | <a href="#">Rho-related GTP-binding protein RhoF OS=Homo sapiens GN=RHOPE=2 SV=1 - [RHOF HUMAN]</a>                             | 245,32   | 0,00 |
| Q9BV40   | <a href="#">Vesicle-associated membrane protein 8 OS=Homo sapiens GN=VAMP8 PE=1 SV=1 - [VAMP8 HUMAN]</a>                        | 16,97    | 0,00 |
| Q9BT78   | <a href="#">COP9 signalosome complex subunit 4 OS=Homo sapiens GN=COPS4 PE=1 SV=1 - [CSN4 HUMAN]</a>                            | 1,91     | 0,00 |
| O00220   | <a href="#">Tumor necrosis factor receptor superfamily member 10A OS=Homo sapiens GN=TNFRSF10A PE=1 SV=3 - [TR10A HU</a>        | 12,26    | 0,00 |
| Q9HAU0-5 | <a href="#">Isoform 5 of Pleckstrin homology domain-containing family A member 5 OS=Homo sapiens GN=PLEKHA5 - [PKHA5 H</a>      | 2,99     | 0,00 |
| Q86WV6   | <a href="#">Transmembrane protein 173 OS=Homo sapiens GN=TMEM173 PE=1 SV=1 - [TM173 HUMAN]</a>                                  | 3,35     | 0,00 |
| Q6ZMK1-2 | <a href="#">Isoform 2 of Cysteine and histidine-rich protein 1 OS=Homo sapiens GN=CYHR1 - [CYHR1 HUMAN]</a>                     | 2,13     | 0,00 |
| Q9H0R8   | <a href="#">Gamma-aminobutyric acid receptor-associated protein-like 1 OS=Homo sapiens GN=GABARAPL1 PE=1 SV=1 - [GBRL1</a>      | 2,19     | 0,00 |
| P20592   | <a href="#">Interferon-induced GTP-binding protein Mx2 OS=Homo sapiens GN=MX2 PE=1 SV=1 - [MX2 HUMAN]</a>                       | 1,67     | 0,00 |
| P43003   | <a href="#">Excitatory amino acid transporter 1 OS=Homo sapiens GN=SLC1A3 PE=1 SV=1 - [EAA1 HUMAN]</a>                          | 12,45    | 0,00 |
| Q9UN86-2 | <a href="#">Isoform B of Ras GTPase-activating protein-binding protein 2 OS=Homo sapiens GN=G3BP2 - [G3BP2 HUMAN]</a>           | 2,03     | 0,00 |
| P07196   | <a href="#">Neurofilament light polypeptide OS=Homo sapiens GN=NEFL PE=1 SV=3 - [NFL HUMAN]</a>                                 | 24,47    | 0,00 |
| P43353-2 | <a href="#">Isoform 2 of Aldehyde dehydrogenase family 3 member B1 OS=Homo sapiens GN=ALDH3B1 - [AL3B1 HUMAN]</a>               | 3,93     | 0,00 |
| O75369-6 | <a href="#">Isoform 6 of Filamin-B OS=Homo sapiens GN=FLNB - [FLNB HUMAN]</a>                                                   | 6,72     | 0,00 |
| P31321   | <a href="#">cAMP-dependent protein kinase type I-beta regulatory subunit OS=Homo sapiens GN=PRKAR1B PE=1 SV=4 - [KAP1 P</a>     | 2,75     | 0,00 |
| Q53EU6   | <a href="#">Glycerol-3-phosphate acyltransferase 3 OS=Homo sapiens GN=AGPAT9 PE=1 SV=2 - [GPAT3 HUMAN]</a>                      | 3,73     | 0,00 |
| O60437   | <a href="#">Periplakin OS=Homo sapiens GN=PPL PE=1 SV=4 - [PEPL HUMAN]</a>                                                      | 10,25    | 0,00 |
| Q9NY43   | <a href="#">BarH-like 2 homeobox protein OS=Homo sapiens GN=BARHL2 PE=2 SV=2 - [BARH2 HUMAN]</a>                                | 1,60     | 0,00 |
| Q9H6S3   | <a href="#">Epidermal growth factor receptor kinase substrate 8-like protein 2 OS=Homo sapiens GN=EPS8L2 PE=1 SV=2 - [ES8L2</a> | 10,70    | 0,00 |
| Q9BW91-2 | <a href="#">Isoform 2 of ADP-ribose pyrophosphatase, mitochondrial OS=Homo sapiens GN=NUDT9 - [NUDT9 HUMAN]</a>                 | 2,15     | 0,00 |
| O75051   | <a href="#">Plexin-A2 OS=Homo sapiens GN=PLXNA2 PE=1 SV=4 - [PLXA2 HUMAN]</a>                                                   | 2,14     | 0,00 |
| P25445-6 | <a href="#">Isoform 6 of Tumor necrosis factor receptor superfamily member 6 OS=Homo sapiens GN=FAS - [TNR6 HUMAN]</a>          | 2,27     | 0,00 |



### A375 vs. A375VR4

|          |                                                                                                                              |              |      |
|----------|------------------------------------------------------------------------------------------------------------------------------|--------------|------|
| P50222   | <a href="#">Homeobox protein MOX-2 OS=Homo sapiens GN=MEOX2 PE=1 SV=2 - [MEOX2 HUMAN]</a>                                    | 2,85         | 0,00 |
| P32970   | <a href="#">CD70 antigen OS=Homo sapiens GN=CD70 PE=1 SV=2 - [CD70 HUMAN]</a>                                                | 3,03         | 0,00 |
| Q86SJ2   | <a href="#">Amphoterin-induced protein 2 OS=Homo sapiens GN=AMIGO2 PE=1 SV=1 - [AMGO2 HUMAN]</a>                             | 116,39       | 0,00 |
| Q8IWS0   | <a href="#">PHD finger protein 6 OS=Homo sapiens GN=PHF6 PE=1 SV=1 - [PHF6 HUMAN]</a>                                        | 1,62         | 0,00 |
| Q9NX02-3 | <a href="#">Isoform 3 of NACHT, LRR and PYD domains-containing protein 2 OS=Homo sapiens GN=NLRP2 - [NALP2 HUMAN]</a>        | 160518194,63 | 0,00 |
| P29034   | <a href="#">Protein S100-A2 OS=Homo sapiens GN=S100A2 PE=1 SV=3 - [S10A2 HUMAN]</a>                                          | 5,23         | 0,00 |
| Q8IZV5   | <a href="#">Retinol dehydrogenase 10 OS=Homo sapiens GN=RDH10 PE=1 SV=1 - [RDH10 HUMAN]</a>                                  | 2,14         | 0,00 |
| Q02930-4 | <a href="#">Isoform 4 of Cyclic AMP-responsive element-binding protein 5 OS=Homo sapiens GN=CREB5 - [CREB5 HUMAN]</a>        | 2,24         | 0,00 |
| Q9UPQ8   | <a href="#">Dolichol kinase OS=Homo sapiens GN=DOLK PE=1 SV=1 - [DOLK HUMAN]</a>                                             | 2,61         | 0,00 |
| Q13813   | <a href="#">Spectrin alpha chain, brain OS=Homo sapiens GN=SPTAN1 PE=1 SV=3 - [SPTA2 HUMAN]</a>                              | 2,04         | 0,00 |
| Q13887   | <a href="#">Krueppel-like factor 5 OS=Homo sapiens GN=KLF5 PE=1 SV=2 - [KLF5 HUMAN]</a>                                      | 4,60         | 0,00 |
| P15328   | <a href="#">Folate receptor alpha OS=Homo sapiens GN=FOLR1 PE=1 SV=3 - [FOLR1 HUMAN]</a>                                     | 19,34        | 0,00 |
| Q15526-2 | <a href="#">Isoform 2 of Surfeit locus protein 1 OS=Homo sapiens GN=SURF1 - [SURF1 HUMAN]</a>                                | 2,58         | 0,00 |
| P15144   | <a href="#">Aminopeptidase N OS=Homo sapiens GN=ANPEP PE=1 SV=4 - [AMPN HUMAN]</a>                                           | 50,31        | 0,00 |
| Q96CF2   | <a href="#">Charged multivesicular body protein 4c OS=Homo sapiens GN=CHMP4C PE=1 SV=1 - [CHM4C HUMAN]</a>                   | 8,89         | 0,00 |
| O00425   | <a href="#">Insulin-like growth factor 2 mRNA-binding protein 3 OS=Homo sapiens GN=IGF2BP3 PE=1 SV=2 - [IF2B3 HUMAN]</a>     | 1,76         | 0,00 |
| Q6P9B6   | <a href="#">TLD domain-containing protein KIAA1609 OS=Homo sapiens GN=KIAA1609 PE=1 SV=2 - [K1609 HUMAN]</a>                 | 1,86         | 0,00 |
| Q0ZGT2-2 | <a href="#">Isoform 2 of Nexilin OS=Homo sapiens GN=NEXN - [NEXN HUMAN]</a>                                                  | 4,46         | 0,00 |
| Q9UBW8   | <a href="#">COP9 signalosome complex subunit 7a OS=Homo sapiens GN=COPS7A PE=1 SV=1 - [CSN7A HUMAN]</a>                      | 1,80         | 0,00 |
| Q5T5S1   | <a href="#">Uncharacterized coiled-coil domain-containing protein KIAA1984 OS=Homo sapiens GN=KIAA1984 PE=2 SV=3 - [K198</a> | 899,15       | 0,00 |
| P35612   | <a href="#">Beta-adducin OS=Homo sapiens GN=ADD2 PE=1 SV=3 - [ADDB HUMAN]</a>                                                | 4,24         | 0,00 |
| Q8N3D4   | <a href="#">EH domain-binding protein 1-like protein 1 OS=Homo sapiens GN=EHP1L1 PE=1 SV=2 - [EH1L1 HUMAN]</a>               | 1,77         | 0,00 |
| P07203   | <a href="#">Glutathione peroxidase 1 OS=Homo sapiens GN=GPX1 PE=1 SV=4 - [GPX1 HUMAN]</a>                                    | 1,69         | 0,00 |
| Q9UQ49   | <a href="#">Sialidase-3 OS=Homo sapiens GN=NEU3 PE=1 SV=1 - [NEUR3 HUMAN]</a>                                                | 3,69         | 0,00 |
| Q6UWZ7   | <a href="#">BRCA1-A complex subunit Abraxas OS=Homo sapiens GN=FAM175A PE=1 SV=2 - [F175A HUMAN]</a>                         | 3,16         | 0,00 |
| Q9NZV1   | <a href="#">Cysteine-rich motor neuron 1 protein OS=Homo sapiens GN=CRIM1 PE=1 SV=1 - [CRIM1 HUMAN]</a>                      | 1,64         | 0,00 |
| P52926   | <a href="#">High mobility group protein HMGI-C OS=Homo sapiens GN=HMGA2 PE=1 SV=1 - [HMGA2 HUMAN]</a>                        | 1,68         | 0,00 |
| Q9NZI8   | <a href="#">Insulin-like growth factor 2 mRNA-binding protein 1 OS=Homo sapiens GN=IGF2BP1 PE=1 SV=2 - [IF2B1 HUMAN]</a>     | 1,63         | 0,00 |
| P10301   | <a href="#">Ras-related protein R-Ras OS=Homo sapiens GN=RRAS PE=1 SV=1 - [RRAS HUMAN]</a>                                   | 3,02         | 0,00 |
| Q15599   | <a href="#">Na(+)/H(+) exchange regulatory cofactor NHE-RF2 OS=Homo sapiens GN=SLC9A3R2 PE=1 SV=2 - [NHRF2 HUMAN]</a>        | 1,99         | 0,00 |
| Q9UNW1   | <a href="#">Multiple inositol polyphosphate phosphatase 1 OS=Homo sapiens GN=MINPP1 PE=1 SV=1 - [MINP1 HUMAN]</a>            | 2,47         | 0,00 |
| Q8N3K9   | <a href="#">Cardiomyopathy-associated protein 5 OS=Homo sapiens GN=CMYA5 PE=1 SV=3 - [CMYA5 HUMAN]</a>                       | 1,66         | 0,00 |
| Q9NVH6-2 | <a href="#">Isoform B of Trimethyllysine dioxygenase, mitochondrial OS=Homo sapiens GN=TMLHE - [TMLH HUMAN]</a>              | 1,97         | 0,00 |

## A375 vs. A375VR4

|          |                                                                                                                                      |      |      |
|----------|--------------------------------------------------------------------------------------------------------------------------------------|------|------|
| O60427   | <a href="#">Fatty acid desaturase 1 OS=Homo sapiens GN=FADS1 PE=1 SV=1 - [FADS1 HUMAN]</a>                                           | 4,43 | 0,00 |
| O15020-2 | <a href="#">Isoform 2 of Spectrin beta chain, brain 2 OS=Homo sapiens GN=SPTBN2 - [SPTN2 HUMAN]</a>                                  | 2,02 | 0,00 |
| P08581   | <a href="#">Hepatocyte growth factor receptor OS=Homo sapiens GN=MET PE=1 SV=4 - [MET HUMAN]</a>                                     | 2,59 | 0,00 |
| Q8NBJ7-2 | <a href="#">Isoform 2 of Sulfatase-modifying factor 2 OS=Homo sapiens GN=SUMF2 - [SUMF2 HUMAN]</a>                                   | 1,86 | 0,00 |
| Q13740-2 | <a href="#">Isoform 2 of CD166 antigen OS=Homo sapiens GN=ALCAM - [CD166 HUMAN]</a>                                                  | 2,60 | 0,00 |
| Q8N3E9   | <a href="#">1-phosphatidylinositol-4,5-bisphosphate phosphodiesterase delta-3 OS=Homo sapiens GN=PLCD3 PE=1 SV=3 - [PLCD3 HUMAN]</a> | 2,58 | 0,00 |
| Q96C36   | <a href="#">Pyrroline-5-carboxylate reductase 2 OS=Homo sapiens GN=PYCR2 PE=1 SV=1 - [P5CR2 HUMAN]</a>                               | 1,70 | 0,00 |
| P26885   | <a href="#">Peptidyl-prolyl cis-trans isomerase FKBP2 OS=Homo sapiens GN=FKBP2 PE=1 SV=2 - [FKBP2 HUMAN]</a>                         | 2,27 | 0,00 |
| Q9H936   | <a href="#">Mitochondrial glutamate carrier 1 OS=Homo sapiens GN=SLC25A22 PE=1 SV=1 - [GHC1 HUMAN]</a>                               | 3,35 | 0,00 |
| Q92985-3 | <a href="#">Isoform C of Interferon regulatory factor 7 OS=Homo sapiens GN=IRF7 - [IRF7 HUMAN]</a>                                   | 1,74 | 0,00 |
| Q86UN3   | <a href="#">Reticulon-4 receptor-like 2 OS=Homo sapiens GN=RTN4RL2 PE=1 SV=1 - [R4RL2 HUMAN]</a>                                     | 2,63 | 0,00 |
| Q14697-2 | <a href="#">Isoform 2 of Neutral alpha-glucosidase AB OS=Homo sapiens GN=GANAB - [GANAB HUMAN]</a>                                   | 1,64 | 0,00 |
| P13987   | <a href="#">CD59 glycoprotein OS=Homo sapiens GN=CD59 PE=1 SV=1 - [CD59 HUMAN]</a>                                                   | 2,49 | 0,00 |
| Q15434   | <a href="#">RNA-binding motif, single-stranded-interacting protein 2 OS=Homo sapiens GN=RBMS2 PE=1 SV=1 - [RBMS2 HUMAN]</a>          | 2,01 | 0,00 |
| Q8NEW0   | <a href="#">Zinc transporter 7 OS=Homo sapiens GN=SLC30A7 PE=1 SV=1 - [ZNT7 HUMAN]</a>                                               | 1,71 | 0,00 |
| Q13620-1 | <a href="#">Isoform 2 of Cullin-4B OS=Homo sapiens GN=CUL4B - [CUL4B HUMAN]</a>                                                      | 1,57 | 0,00 |
| P30530-2 | <a href="#">Isoform Short of Tyrosine-protein kinase receptor UFO OS=Homo sapiens GN=AXL - [UFO HUMAN]</a>                           | 1,59 | 0,00 |
| P14923   | <a href="#">Junction plakoglobin OS=Homo sapiens GN=JUP PE=1 SV=3 - [PLAK HUMAN]</a>                                                 | 1,66 | 0,00 |
| Q99653   | <a href="#">Calcium-binding protein p22 OS=Homo sapiens GN=CHP PE=1 SV=3 - [CHP1 HUMAN]</a>                                          | 2,22 | 0,00 |
| P62070   | <a href="#">Ras-related protein R-Ras2 OS=Homo sapiens GN=RRAS2 PE=1 SV=1 - [RRAS2 HUMAN]</a>                                        | 1,80 | 0,00 |
| O14657   | <a href="#">Torsin-1B OS=Homo sapiens GN=TOR1B PE=1 SV=2 - [TOR1B HUMAN]</a>                                                         | 5,92 | 0,00 |
| Q13015   | <a href="#">Protein AF1q OS=Homo sapiens GN=MLLT11 PE=2 SV=1 - [AF1Q HUMAN]</a>                                                      | 2,15 | 0,00 |
| P14210-6 | <a href="#">Isoform 6 of Hepatocyte growth factor OS=Homo sapiens GN=HGF - [HGF HUMAN]</a>                                           | 3,15 | 0,00 |
| A0AV96-2 | <a href="#">Isoform 2 of RNA-binding protein 47 OS=Homo sapiens GN=RBM47 - [RBM47 HUMAN]</a>                                         | 1,61 | 0,00 |
| Q96NZ8   | <a href="#">WAP, kazal, immunoglobulin, kunitz and NTR domain-containing protein 1 OS=Homo sapiens GN=WFIKKN1 PE=1 SV=1</a>          | 2,40 | 0,00 |
| Q9BY67   | <a href="#">Cell adhesion molecule 1 OS=Homo sapiens GN=CADM1 PE=1 SV=2 - [CADM1 HUMAN]</a>                                          | 2,33 | 0,00 |
| Q9Y4K1   | <a href="#">Absent in melanoma 1 protein OS=Homo sapiens GN=AIM1 PE=1 SV=3 - [AIM1 HUMAN]</a>                                        | 1,78 | 0,00 |
| P19532   | <a href="#">Transcription factor E3 OS=Homo sapiens GN=TFE3 PE=1 SV=4 - [TFE3 HUMAN]</a>                                             | 1,46 | 0,00 |
| Q01955   | <a href="#">Collagen alpha-3(IV) chain OS=Homo sapiens GN=COL4A3 PE=1 SV=3 - [CO4A3 HUMAN]</a>                                       | 1,76 | 0,00 |
| O95816   | <a href="#">BAG family molecular chaperone regulator 2 OS=Homo sapiens GN=BAG2 PE=1 SV=1 - [BAG2 HUMAN]</a>                          | 1,70 | 0,00 |
| Q6JQN1   | <a href="#">Acyl-CoA dehydrogenase family member 10 OS=Homo sapiens GN=ACAD10 PE=2 SV=1 - [ACD10 HUMAN]</a>                          | 1,67 | 0,00 |
| O95466   | <a href="#">Formin-like protein 1 OS=Homo sapiens GN=FMNL1 PE=1 SV=3 - [FMNL HUMAN]</a>                                              | 1,76 | 0,00 |
| Q92968   | <a href="#">Peroxisomal membrane protein PEX13 OS=Homo sapiens GN=PEX13 PE=1 SV=2 - [PEX13 HUMAN]</a>                                | 1,49 | 0,00 |

## A375 vs. A375VR4

|          |                                                                                                                                |        |      |
|----------|--------------------------------------------------------------------------------------------------------------------------------|--------|------|
| Q12959-4 | <a href="#">Isoform 4 of Disks large homolog 1 OS=Homo sapiens GN=DLG1 - [DLG1 HUMAN]</a>                                      | 1,91   | 0,00 |
| Q9ULS5   | <a href="#">Transmembrane and coiled-coil domains protein 3 OS=Homo sapiens GN=TMCC3 PE=2 SV=3 - [TMCC3 HUMAN]</a>             | 2,21   | 0,00 |
| O14639   | <a href="#">Actin-binding LIM protein 1 OS=Homo sapiens GN=ABLIM1 PE=1 SV=3 - [ABLM1 HUMAN]</a>                                | 2,02   | 0,00 |
| P84095   | <a href="#">Rho-related GTP-binding protein RhoG OS=Homo sapiens GN=RHOG PE=1 SV=1 - [RHOG HUMAN]</a>                          | 2,26   | 0,00 |
| Q14160   | <a href="#">Protein scribble homolog OS=Homo sapiens GN=SCRIB PE=1 SV=4 - [SCRIB HUMAN]</a>                                    | 1,77   | 0,00 |
| Q13586   | <a href="#">Stromal interaction molecule 1 OS=Homo sapiens GN=STIM1 PE=1 SV=3 - [STIM1 HUMAN]</a>                              | 2,48   | 0,00 |
| Q96B70   | <a href="#">Leukocyte receptor cluster member 9 OS=Homo sapiens GN=LENG9 PE=2 SV=2 - [LENG9 HUMAN]</a>                         | 2,28   | 0,00 |
| P60903   | <a href="#">Protein S100-A10 OS=Homo sapiens GN=S100A10 PE=1 SV=2 - [S10AA HUMAN]</a>                                          | 1,58   | 0,00 |
| P10696   | <a href="#">Alkaline phosphatase, placental-like OS=Homo sapiens GN=ALPPL2 PE=1 SV=4 - [PPBN HUMAN]</a>                        | 207,48 | 0,00 |
| Q86XX4-5 | <a href="#">Isoform 5 of Extracellular matrix protein FRAS1 OS=Homo sapiens GN=FRAS1 - [FRAS1 HUMAN]</a>                       | 2,65   | 0,00 |
| Q14CZ8-2 | <a href="#">Isoform 2 of Hepatocyte cell adhesion molecule OS=Homo sapiens GN=HEPACAM - [HECAM HUMAN]</a>                      | 1,55   | 0,00 |
| Q9BUK0   | <a href="#">Coiled-coil-helix-coiled-coil-helix domain-containing protein 7 OS=Homo sapiens GN=CHCHD7 PE=2 SV=1 - [CHCH7 H</a> | 2,28   | 0,00 |
| P13645   | <a href="#">Keratin, type I cytoskeletal 10 OS=Homo sapiens GN=KRT10 PE=1 SV=6 - [K1C10 HUMAN]</a>                             | 1,50   | 0,00 |
| P00533   | <a href="#">Epidermal growth factor receptor OS=Homo sapiens GN=EGFR PE=1 SV=2 - [EGFR HUMAN]</a>                              | 2,51   | 0,00 |
| O14656   | <a href="#">Torsin-1A OS=Homo sapiens GN=TOR1A PE=1 SV=1 - [TOR1A HUMAN]</a>                                                   | 1,99   | 0,00 |
| Q9Y3L5   | <a href="#">Ras-related protein Rap-2c OS=Homo sapiens GN=RAP2C PE=1 SV=1 - [RAP2C HUMAN]</a>                                  | 2,37   | 0,00 |
| Q96IF1   | <a href="#">LIM domain-containing protein ajuba OS=Homo sapiens GN=AJUBA PE=1 SV=1 - [AJUBA HUMAN]</a>                         | 2,46   | 0,00 |
| Q15067   | <a href="#">Peroxisomal acyl-coenzyme A oxidase 1 OS=Homo sapiens GN=ACOX1 PE=1 SV=3 - [ACOX1 HUMAN]</a>                       | 2,37   | 0,00 |
| Q7Z402   | <a href="#">Transmembrane channel-like protein 7 OS=Homo sapiens GN=TMC7 PE=2 SV=1 - [TMC7 HUMAN]</a>                          | 2,01   | 0,00 |
| P07355   | <a href="#">Annexin A2 OS=Homo sapiens GN=ANXA2 PE=1 SV=2 - [ANXA2 HUMAN]</a>                                                  | 1,71   | 0,00 |
| P79522-2 | <a href="#">Isoform 2 of Proline-rich protein 3 OS=Homo sapiens GN=PRR3 - [PRR3 HUMAN]</a>                                     | 2,02   | 0,00 |
| Q9HBH5   | <a href="#">Retinol dehydrogenase 14 OS=Homo sapiens GN=RDH14 PE=1 SV=1 - [RDH14 HUMAN]</a>                                    | 2,41   | 0,00 |
| Q96I45   | <a href="#">Transmembrane protein 141 OS=Homo sapiens GN=TMEM141 PE=2 SV=1 - [TM141 HUMAN]</a>                                 | 2,45   | 0,00 |
| Q9H3Q1   | <a href="#">Cdc42 effector protein 4 OS=Homo sapiens GN=CDC42EP4 PE=1 SV=1 - [BORG4 HUMAN]</a>                                 | 1,99   | 0,00 |
| Q7L8J4   | <a href="#">SH3 domain-binding protein 5-like OS=Homo sapiens GN=SH3BP5L PE=1 SV=1 - [3BP5L HUMAN]</a>                         | 2,41   | 0,00 |
| Q9UIV1   | <a href="#">CCR4-NOT transcription complex subunit 7 OS=Homo sapiens GN=CNOT7 PE=1 SV=3 - [CNOT7 HUMAN]</a>                    | 1,46   | 0,00 |
| P07339   | <a href="#">Cathepsin D OS=Homo sapiens GN=CTSD PE=1 SV=1 - [CATD HUMAN]</a>                                                   | 1,52   | 0,00 |
| Q9UQ03-2 | <a href="#">Isoform 2 of Coronin-2B OS=Homo sapiens GN=CORO2B - [COR2B HUMAN]</a>                                              | 1,77   | 0,00 |
| Q15147-2 | <a href="#">Isoform 1 of 1-phosphatidylinositol-4,5-bisphosphate phosphodiesterase beta-4 OS=Homo sapiens GN=PLCB4 - [PLCE</a> | 3,43   | 0,00 |
| P11117   | <a href="#">Lysosomal acid phosphatase OS=Homo sapiens GN=ACP2 PE=1 SV=3 - [PPAL HUMAN]</a>                                    | 1,89   | 0,00 |
| P05161   | <a href="#">Ubiquitin-like protein ISG15 OS=Homo sapiens GN=ISG15 PE=1 SV=5 - [ISG15 HUMAN]</a>                                | 1,86   | 0,00 |
| Q09666   | <a href="#">Neuroblast differentiation-associated protein AHNAK OS=Homo sapiens GN=AHNAK PE=1 SV=2 - [AHNK HUMAN]</a>          | 1,63   | 0,00 |
| O94854-2 | <a href="#">Isoform 2 of Uncharacterized protein KIAA0754 OS=Homo sapiens GN=KIAA0754 - [K0754 HUMAN]</a>                      | 1,68   | 0,00 |

## A375 vs. A375VR4

|          |                                                                                                                                       |        |      |
|----------|---------------------------------------------------------------------------------------------------------------------------------------|--------|------|
| Q9HC16   | <a href="#">DNA dC-&gt;dU-editing enzyme APOBEC-3G OS=Homo sapiens GN=APOBEC3G PE=1 SV=1 - [ABC3G_HUMAN]</a>                          | 2,74   | 0,00 |
| Q8N3V7-2 | <a href="#">Isoform 2 of Synaptopodin OS=Homo sapiens GN=SYNPO - [SYNPO_HUMAN]</a>                                                    | 3,35   | 0,00 |
| Q969G2   | <a href="#">LIM/homeobox protein Lhx4 OS=Homo sapiens GN=LHX4 PE=1 SV=2 - [LHX4_HUMAN]</a>                                            | 1,45   | 0,00 |
| O14967   | <a href="#">Calmegin OS=Homo sapiens GN=CLGN PE=1 SV=1 - [CLGN_HUMAN]</a>                                                             | 1,53   | 0,00 |
| Q99828   | <a href="#">Calcium and integrin-binding protein 1 OS=Homo sapiens GN=CIB1 PE=1 SV=4 - [CIB1_HUMAN]</a>                               | 1,52   | 0,00 |
| Q9GZT6-2 | <a href="#">Isoform 2 of Coiled-coil domain-containing protein 90B, mitochondrial OS=Homo sapiens GN=CCDC90B - [CC90B_HUMAN]</a>      | 2,08   | 0,00 |
| Q6UW68   | <a href="#">Transmembrane protein 205 OS=Homo sapiens GN=TMEM205 PE=1 SV=1 - [TM205_HUMAN]</a>                                        | 1,53   | 0,00 |
| P55290   | <a href="#">Cadherin-13 OS=Homo sapiens GN=CDH13 PE=1 SV=1 - [CAD13_HUMAN]</a>                                                        | 1,58   | 0,00 |
| O00479   | <a href="#">High mobility group nucleosome-binding domain-containing protein 4 OS=Homo sapiens GN=HMGN4 PE=1 SV=3 - [HMGN4_HUMAN]</a> | 1,51   | 0,00 |
| Q92692   | <a href="#">Poliovirus receptor-related protein 2 OS=Homo sapiens GN=PVRL2 PE=1 SV=1 - [PVRL2_HUMAN]</a>                              | 2,36   | 0,00 |
| Q8N4T8-2 | <a href="#">Isoform 2 of Carbonyl reductase family member 4 OS=Homo sapiens GN=CBR4 - [CBR4_HUMAN]</a>                                | 1,60   | 0,00 |
| O60220   | <a href="#">Mitochondrial import inner membrane translocase subunit Tim8 A OS=Homo sapiens GN=TIMM8A PE=1 SV=1 - [TIMM8A_HUMAN]</a>   | 2,05   | 0,00 |
| Q6P4E1-2 | <a href="#">Isoform 2 of Protein CASC4 OS=Homo sapiens GN=CASC4 - [CASC4_HUMAN]</a>                                                   | 2,05   | 0,00 |
| Q8WWI1-3 | <a href="#">Isoform 3 of LIM domain only protein 7 OS=Homo sapiens GN=LMO7 - [LMO7_HUMAN]</a>                                         | 2,17   | 0,00 |
| Q86UT6   | <a href="#">NLR family member X1 OS=Homo sapiens GN=NLRX1 PE=1 SV=1 - [NLRX1_HUMAN]</a>                                               | 2,48   | 0,00 |
| Q9Y6X4   | <a href="#">Protein FAM169A OS=Homo sapiens GN=FAM169A PE=1 SV=2 - [F169A_HUMAN]</a>                                                  | 1,83   | 0,00 |
| P25815   | <a href="#">Protein S100-P OS=Homo sapiens GN=S100P PE=1 SV=2 - [S100P_HUMAN]</a>                                                     | 953,99 | 0,00 |
| Q86U28   | <a href="#">Iron-sulfur cluster assembly 2 homolog, mitochondrial OS=Homo sapiens GN=ISCA2 PE=1 SV=2 - [ISCA2_HUMAN]</a>              | 1,69   | 0,00 |
| Q07817-2 | <a href="#">Isoform Bcl-X(S) of Bcl-2-like protein 1 OS=Homo sapiens GN=BCL2L1 - [B2CL1_HUMAN]</a>                                    | 1,76   | 0,00 |
| Q15293   | <a href="#">Reticulocalbin-1 OS=Homo sapiens GN=RCN1 PE=1 SV=1 - [RCN1_HUMAN]</a>                                                     | 1,50   | 0,00 |
| Q96HR9   | <a href="#">Receptor expression-enhancing protein 6 OS=Homo sapiens GN=REEP6 PE=1 SV=1 - [REEP6_HUMAN]</a>                            | 1,47   | 0,00 |
| Q13188   | <a href="#">Serine/threonine-protein kinase 3 OS=Homo sapiens GN=STK3 PE=1 SV=2 - [STK3_HUMAN]</a>                                    | 1,65   | 0,00 |
| A5D8V6   | <a href="#">Vacuolar protein sorting-associated protein 37C OS=Homo sapiens GN=VPS37C PE=1 SV=2 - [VP37C_HUMAN]</a>                   | 2,16   | 0,00 |
| Q15149-8 | <a href="#">Isoform 8 of Plectin OS=Homo sapiens GN=PLEC - [PLEC_HUMAN]</a>                                                           | 2,82   | 0,00 |
| O95772-2 | <a href="#">Isoform 2 of MLN64 N-terminal domain homolog OS=Homo sapiens GN=STARD3NL - [MENTO_HUMAN]</a>                              | 3,16   | 0,00 |
| Q8NHG7   | <a href="#">Small VCP/p97-interacting protein OS=Homo sapiens GN=SVIP PE=2 SV=1 - [SVIP_HUMAN]</a>                                    | 1,69   | 0,00 |
| Q5T2D3   | <a href="#">OTU domain-containing protein 3 OS=Homo sapiens GN=OTUD3 PE=1 SV=1 - [OTUD3_HUMAN]</a>                                    | 1,36   | 0,00 |
| Q9BSH5   | <a href="#">Haloacid dehalogenase-like hydrolase domain-containing protein 3 OS=Homo sapiens GN=HDHD3 PE=1 SV=1 - [HDHD3_HUMAN]</a>   | 1,59   | 0,00 |
| Q8N4A0   | <a href="#">Polypeptide N-acetylgalactosaminyltransferase 4 OS=Homo sapiens GN=GALNT4 PE=1 SV=2 - [GALT4_HUMAN]</a>                   | 1,81   | 0,00 |
| Q96SW2-2 | <a href="#">Isoform 2 of Protein cereblon OS=Homo sapiens GN=CRBN - [CRBN_HUMAN]</a>                                                  | 2,41   | 0,00 |
| Q15262   | <a href="#">Receptor-type tyrosine-protein phosphatase kappa OS=Homo sapiens GN=PTPRK PE=1 SV=2 - [PTPRK_HUMAN]</a>                   | 2,31   | 0,00 |
| Q9BYD6   | <a href="#">39S ribosomal protein L1, mitochondrial OS=Homo sapiens GN=MRPL1 PE=1 SV=2 - [RM01_HUMAN]</a>                             | 1,71   | 0,00 |
| P30044-2 | <a href="#">Isoform Cytoplasmic+peroxisomal of Peroxiredoxin-5, mitochondrial OS=Homo sapiens GN=PRDX5 - [PRDX5_HUMAN]</a>            | 1,41   | 0,00 |

## A375 vs. A375VR4

|          |                                                                                                                                          |             |      |
|----------|------------------------------------------------------------------------------------------------------------------------------------------|-------------|------|
| Q4VC05   | <a href="#">B-cell CLL/lymphoma 7 protein family member A OS=Homo sapiens GN=BCL7A PE=1 SV=1 - [BCL7A_HUMAN]</a>                         | 1,69        | 0,00 |
| P48431   | <a href="#">Transcription factor SOX-2 OS=Homo sapiens GN=SOX2 PE=1 SV=1 - [SOX2_HUMAN]</a>                                              | 1,77        | 0,00 |
| Q8NBM4-4 | <a href="#">Isoform 4 of Ubiquitin-associated domain-containing protein 2 OS=Homo sapiens GN=UBAC2 - [UBAC2_HUMAN]</a>                   | 2,05        | 0,00 |
| Q9HCE1   | <a href="#">Putative helicase MOV-10 OS=Homo sapiens GN=MOV10 PE=1 SV=2 - [MOV10_HUMAN]</a>                                              | 1,54        | 0,00 |
| P20908   | <a href="#">Collagen alpha-1(V) chain OS=Homo sapiens GN=COL5A1 PE=1 SV=3 - [CO5A1_HUMAN]</a>                                            | 13,97       | 0,00 |
| Q5JRK9   | <a href="#">Putative G antigen family E member 3 OS=Homo sapiens GN=PAGE2B PE=2 SV=1 - [GGEE3_HUMAN]</a>                                 | 24492356,65 | 0,00 |
| Q01650   | <a href="#">Large neutral amino acids transporter small subunit 1 OS=Homo sapiens GN=SLC7A5 PE=1 SV=2 - [LAT1_HUMAN]</a>                 | 2,85        | 0,00 |
| Q9UBF1   | <a href="#">Melanoma-associated antigen C2 OS=Homo sapiens GN=MAGEC2 PE=1 SV=1 - [MAGC2_HUMAN]</a>                                       | 1,54        | 0,00 |
| Q6SJ93   | <a href="#">Protein FAM111B OS=Homo sapiens GN=FAM111B PE=2 SV=1 - [F111B_HUMAN]</a>                                                     | 1,51        | 0,00 |
| O14832   | <a href="#">Phytanoyl-CoA dioxygenase, peroxisomal OS=Homo sapiens GN=PHYH PE=1 SV=1 - [PAHX_HUMAN]</a>                                  | 1,50        | 0,00 |
| P05783   | <a href="#">Keratin, type I cytoskeletal 18 OS=Homo sapiens GN=KRT18 PE=1 SV=2 - [K1C18_HUMAN]</a>                                       | 1,62        | 0,00 |
| Q9NYM9   | <a href="#">BET1-like protein OS=Homo sapiens GN=BET1L PE=1 SV=1 - [BET1L_HUMAN]</a>                                                     | 1,80        | 0,00 |
| O94766   | <a href="#">Galactosylgalactosylxylosylprotein 3-beta-glucuronosyltransferase 3 OS=Homo sapiens GN=B3GAT3 PE=1 SV=2 - [B3GAT3_HUMAN]</a> | 3,08        | 0,00 |
| Q13825-2 | <a href="#">Isoform 2 of Methylglutaconyl-CoA hydratase, mitochondrial OS=Homo sapiens GN=AUH - [AUHM_HUMAN]</a>                         | 1,48        | 0,00 |
| Q9UHN1   | <a href="#">DNA polymerase subunit gamma-2, mitochondrial OS=Homo sapiens GN=POLG2 PE=1 SV=1 - [DPOG2_HUMAN]</a>                         | 1,65        | 0,00 |
| P49184   | <a href="#">Deoxyribonuclease-1-like 1 OS=Homo sapiens GN=DNASE1L1 PE=1 SV=1 - [DNSL1_HUMAN]</a>                                         | 1,53        | 0,00 |
| P78381-2 | <a href="#">Isoform UGT1 of UDP-galactose translocator OS=Homo sapiens GN=SLC35A2 - [S35A2_HUMAN]</a>                                    | 1,36        | 0,00 |
| P22570   | <a href="#">NADPH:adrenodoxin oxidoreductase, mitochondrial OS=Homo sapiens GN=FDXR PE=1 SV=3 - [ADRO_HUMAN]</a>                         | 1,95        | 0,00 |
| Q92478   | <a href="#">C-type lectin domain family 2 member B OS=Homo sapiens GN=CLEC2B PE=2 SV=2 - [CLC2B_HUMAN]</a>                               | 3,90        | 0,00 |
| Q96GN5-2 | <a href="#">Isoform 2 of Cell division cycle-associated 7-like protein OS=Homo sapiens GN=CDCA7L - [CDA7L_HUMAN]</a>                     | 1,60        | 0,00 |
| P04264   | <a href="#">Keratin, type II cytoskeletal 1 OS=Homo sapiens GN=KRT1 PE=1 SV=6 - [K2C1_HUMAN]</a>                                         | 1,57        | 0,00 |
| Q99456   | <a href="#">Keratin, type I cytoskeletal 12 OS=Homo sapiens GN=KRT12 PE=1 SV=1 - [K1C12_HUMAN]</a>                                       | 1,39        | 0,00 |
| Q08AF3   | <a href="#">Schlafen family member 5 OS=Homo sapiens GN=SLFN5 PE=1 SV=1 - [SLFN5_HUMAN]</a>                                              | 2,21        | 0,00 |
| P26006   | <a href="#">Integrin alpha-3 OS=Homo sapiens GN=ITGA3 PE=1 SV=5 - [ITA3_HUMAN]</a>                                                       | 3,08        | 0,00 |
| Q92581   | <a href="#">Sodium/hydrogen exchanger 6 OS=Homo sapiens GN=SLC9A6 PE=1 SV=2 - [SL9A6_HUMAN]</a>                                          | 2,00        | 0,00 |
| Q9H061   | <a href="#">Transmembrane protein 126A OS=Homo sapiens GN=TMEM126A PE=1 SV=1 - [T126A_HUMAN]</a>                                         | 2,18        | 0,00 |
| Q7Z3D6-5 | <a href="#">Isoform 5 of UPF0317 protein C14orf159, mitochondrial OS=Homo sapiens GN=C14orf159 - [CN159_HUMAN]</a>                       | 1,41        | 0,00 |
| Q8IVF2-3 | <a href="#">Isoform 3 of Protein AHNAK2 OS=Homo sapiens GN=AHNAK2 - [AHNK2_HUMAN]</a>                                                    | 1,50        | 0,00 |
| Q8N8U2   | <a href="#">Chromodomain Y-like protein 2 OS=Homo sapiens GN=CDYL2 PE=2 SV=2 - [CDYL2_HUMAN]</a>                                         | 2,05        | 0,00 |
| Q9HAB3   | <a href="#">Riboflavin transporter 3 OS=Homo sapiens GN=GPR172A PE=1 SV=1 - [RFT3_HUMAN]</a>                                             | 1,50        | 0,00 |
| O43790   | <a href="#">Keratin, type II cuticular Hb6 OS=Homo sapiens GN=KRT86 PE=1 SV=1 - [KRT86_HUMAN]</a>                                        | 1,97        | 0,00 |
| P05120   | <a href="#">Plasminogen activator inhibitor 2 OS=Homo sapiens GN=SERPINB2 PE=1 SV=2 - [PAI2_HUMAN]</a>                                   | 153,05      | 0,00 |
| Q86UD1   | <a href="#">Out at first protein homolog OS=Homo sapiens GN=OAF PE=2 SV=1 - [OAF_HUMAN]</a>                                              | 1,80        | 0,00 |

## A375 vs. A375VR4

|          |                                                                                                                                |      |      |
|----------|--------------------------------------------------------------------------------------------------------------------------------|------|------|
| P38936   | <a href="#">Cyclin-dependent kinase inhibitor 1 OS=Homo sapiens GN=CDKN1A PE=1 SV=3 - [CDN1A HUMAN]</a>                        | 4,30 | 0,00 |
| Q52LW3   | <a href="#">Rho GTPase-activating protein 29 OS=Homo sapiens GN=ARHGAP29 PE=1 SV=2 - [RHG29 HUMAN]</a>                         | 1,85 | 0,00 |
| O60831   | <a href="#">PRA1 family protein 2 OS=Homo sapiens GN=PRAF2 PE=1 SV=1 - [PRAF2 HUMAN]</a>                                       | 1,74 | 0,00 |
| Q9NTG7   | <a href="#">NAD-dependent deacetylase sirtuin-3, mitochondrial OS=Homo sapiens GN=SIRT3 PE=1 SV=2 - [SIRT3 HUMAN]</a>          | 1,53 | 0,00 |
| Q15149-4 | <a href="#">Isoform 4 of Plectin OS=Homo sapiens GN=PLEC - [PLEC HUMAN]</a>                                                    | 2,78 | 0,00 |
| Q96DA6   | <a href="#">Mitochondrial import inner membrane translocase subunit TIM14 OS=Homo sapiens GN=DNAJC19 PE=1 SV=3 - [TIM:</a>     | 1,65 | 0,00 |
| Q04727   | <a href="#">Transducin-like enhancer protein 4 OS=Homo sapiens GN=TLE4 PE=1 SV=3 - [TLE4 HUMAN]</a>                            | 1,68 | 0,00 |
| O60763   | <a href="#">General vesicular transport factor p115 OS=Homo sapiens GN=USO1 PE=1 SV=2 - [USO1 HUMAN]</a>                       | 1,95 | 0,00 |
| Q9NYJ1   | <a href="#">Coiled-coil-helix-coiled-coil-helix domain-containing protein 8 OS=Homo sapiens GN=CHCHD8 PE=1 SV=2 - [CHCH8 H</a> | 2,10 | 0,00 |
| Q96K19-5 | <a href="#">Isoform 5 of RING finger protein 170 OS=Homo sapiens GN=RNF170 - [RN170 HUMAN]</a>                                 | 2,99 | 0,00 |
| Q96RT1-7 | <a href="#">Isoform 7 of Protein LAP2 OS=Homo sapiens GN=ERBB2IP - [LAP2 HUMAN]</a>                                            | 1,50 | 0,00 |
| P52758   | <a href="#">Ribonuclease UK114 OS=Homo sapiens GN=HRSP12 PE=1 SV=1 - [UK114 HUMAN]</a>                                         | 1,39 | 0,00 |
| Q8TCZ2-3 | <a href="#">Isoform 3 of CD99 antigen-like protein 2 OS=Homo sapiens GN=CD99L2 - [C99L2 HUMAN]</a>                             | 1,41 | 0,00 |
| Q8IY31   | <a href="#">Intraflagellar transport protein 20 homolog OS=Homo sapiens GN=IFT20 PE=1 SV=1 - [IFT20 HUMAN]</a>                 | 1,33 | 0,00 |
| Q16531   | <a href="#">DNA damage-binding protein 1 OS=Homo sapiens GN=DDB1 PE=1 SV=1 - [DDB1 HUMAN]</a>                                  | 1,47 | 0,00 |
| Q2TAM9   | <a href="#">Tumor suppressor candidate gene 1 protein OS=Homo sapiens GN=TUSC1 PE=1 SV=3 - [TUSC1 HUMAN]</a>                   | 1,69 | 0,00 |
| Q15582   | <a href="#">Transforming growth factor-beta-induced protein ig-h3 OS=Homo sapiens GN=TGFB1 PE=1 SV=1 - [BGH3 HUMAN]</a>        | 2,64 | 0,00 |
| Q9NW68-2 | <a href="#">Isoform 2 of BSD domain-containing protein 1 OS=Homo sapiens GN=BSDC1 - [BSDC1 HUMAN]</a>                          | 1,34 | 0,00 |
| Q9NZ45   | <a href="#">CDGSH iron-sulfur domain-containing protein 1 OS=Homo sapiens GN=CISD1 PE=1 SV=1 - [CISD1 HUMAN]</a>               | 1,63 | 0,00 |
| Q15746-4 | <a href="#">Isoform 3B of Myosin light chain kinase, smooth muscle OS=Homo sapiens GN=MYLK - [MYLK HUMAN]</a>                  | 1,75 | 0,00 |
| P51114-2 | <a href="#">Isoform 2 of Fragile X mental retardation syndrome-related protein 1 OS=Homo sapiens GN=FXR1 - [FXR1 HUMAN]</a>    | 1,31 | 0,00 |
| O60716-5 | <a href="#">Isoform 1A of Catenin delta-1 OS=Homo sapiens GN=CTNND1 - [CTND1 HUMAN]</a>                                        | 1,38 | 0,00 |
| O15455   | <a href="#">Toll-like receptor 3 OS=Homo sapiens GN=TLR3 PE=1 SV=1 - [TLR3 HUMAN]</a>                                          | 1,67 | 0,00 |
| Q8TEM1   | <a href="#">Nuclear pore membrane glycoprotein 210 OS=Homo sapiens GN=NUP210 PE=1 SV=3 - [PO210 HUMAN]</a>                     | 2,61 | 0,00 |
| Q92905   | <a href="#">COP9 signalosome complex subunit 5 OS=Homo sapiens GN=COPS5 PE=1 SV=4 - [CSN5 HUMAN]</a>                           | 1,87 | 0,00 |
| Q9HCP0-2 | <a href="#">Isoform 1S of Casein kinase I isoform gamma-1 OS=Homo sapiens GN=CSNK1G1 - [KC1G1 HUMAN]</a>                       | 1,68 | 0,00 |
| Q53HC5   | <a href="#">Kelch-like protein 26 OS=Homo sapiens GN=KLHL26 PE=1 SV=2 - [KLH26 HUMAN]</a>                                      | 1,49 | 0,00 |
| Q9NZC3   | <a href="#">Glycerophosphodiester phosphodiesterase 1 OS=Homo sapiens GN=GDE1 PE=1 SV=1 - [GDE1 HUMAN]</a>                     | 2,72 | 0,00 |
| P35914   | <a href="#">Hydroxymethylglutaryl-CoA lyase, mitochondrial OS=Homo sapiens GN=HMGCL PE=1 SV=2 - [HMGCL HUMAN]</a>              | 1,51 | 0,00 |
| P98175-4 | <a href="#">Isoform 4 of RNA-binding protein 10 OS=Homo sapiens GN=RBM10 - [RBM10 HUMAN]</a>                                   | 2,07 | 0,00 |
| Q8N5D0-4 | <a href="#">Isoform 4 of WD and tetratricopeptide repeats protein 1 OS=Homo sapiens GN=WDTC1 - [WDTC1 HUMAN]</a>               | 1,44 | 0,00 |
| Q96LJ7   | <a href="#">Dehydrogenase/reductase SDR family member 1 OS=Homo sapiens GN=DHRS1 PE=1 SV=1 - [DHRS1 HUMAN]</a>                 | 1,93 | 0,00 |
| Q08554-2 | <a href="#">Isoform 1B of Desmocollin-1 OS=Homo sapiens GN=DSC1 - [DSC1 HUMAN]</a>                                             | 1,63 | 0,00 |

## A375 vs. A375VR4

|          |                                                                                                                                               |      |      |
|----------|-----------------------------------------------------------------------------------------------------------------------------------------------|------|------|
| Q71RG4-3 | <a href="#">Isoform 3 of Transmembrane and ubiquitin-like domain-containing protein 2 OS=Homo sapiens GN=TMUB2 - [TMUB2]</a>                  | 2,11 | 0,00 |
| Q8NG06   | <a href="#">Tripartite motif-containing protein 58 OS=Homo sapiens GN=TRIM58 PE=2 SV=2 - [TRI58 HUMAN]</a>                                    | 1,46 | 0,00 |
| P49748-2 | <a href="#">Isoform 2 of Very long-chain specific acyl-CoA dehydrogenase, mitochondrial OS=Homo sapiens GN=ACADVL - [ACADVL]</a>              | 1,49 | 0,00 |
| Q15834   | <a href="#">Coiled-coil domain-containing protein 85B OS=Homo sapiens GN=CCDC85B PE=1 SV=2 - [CC85B HUMAN]</a>                                | 1,60 | 0,00 |
| O95167   | <a href="#">NADH dehydrogenase [ubiquinone] 1 alpha subcomplex subunit 3 OS=Homo sapiens GN=NDUFA3 PE=1 SV=1 - [NDUFA3]</a>                   | 1,86 | 0,00 |
| P98160   | <a href="#">Basement membrane-specific heparan sulfate proteoglycan core protein OS=Homo sapiens GN=HSPG2 PE=1 SV=4 - [HSPG2]</a>             | 1,50 | 0,00 |
| Q9Y297-2 | <a href="#">Isoform 2 of F-box/WD repeat-containing protein 1A OS=Homo sapiens GN=BTRC - [FBW1A HUMAN]</a>                                    | 1,77 | 0,00 |
| Q9NQS3   | <a href="#">Poliovirus receptor-related protein 3 OS=Homo sapiens GN=PVRL3 PE=1 SV=1 - [PVRL3 HUMAN]</a>                                      | 3,01 | 0,00 |
| Q96FQ6   | <a href="#">Protein S100-A16 OS=Homo sapiens GN=S100A16 PE=1 SV=1 - [S10A6 HUMAN]</a>                                                         | 2,07 | 0,00 |
| A8K2U0   | <a href="#">Alpha-2-macroglobulin-like protein 1 OS=Homo sapiens GN=A2ML1 PE=1 SV=3 - [A2ML1 HUMAN]</a>                                       | 4,73 | 0,00 |
| Q15697-2 | <a href="#">Isoform 2 of Zinc finger protein 174 OS=Homo sapiens GN=ZNF174 - [ZN174 HUMAN]</a>                                                | 1,44 | 0,00 |
| Q8WUK0-2 | <a href="#">Isoform 2 of Protein-tyrosine phosphatase mitochondrial 1 OS=Homo sapiens GN=PTPMT1 - [PTPM1 HUMAN]</a>                           | 1,98 | 0,00 |
| P51828   | <a href="#">Adenylate cyclase type 7 OS=Homo sapiens GN=ADCY7 PE=2 SV=1 - [ADCY7 HUMAN]</a>                                                   | 2,11 | 0,00 |
| P42773   | <a href="#">Cyclin-dependent kinase 4 inhibitor C OS=Homo sapiens GN=CDKN2C PE=1 SV=1 - [CDKN2C HUMAN]</a>                                    | 1,49 | 0,00 |
| Q7Z449   | <a href="#">Cytochrome P450 2U1 OS=Homo sapiens GN=CYP2U1 PE=1 SV=1 - [CP2U1 HUMAN]</a>                                                       | 1,96 | 0,00 |
| P08195   | <a href="#">4F2 cell-surface antigen heavy chain OS=Homo sapiens GN=SLC3A2 PE=1 SV=3 - [4F2 HUMAN]</a>                                        | 2,67 | 0,00 |
| Q8IUX1-4 | <a href="#">Isoform 4 of Transmembrane protein 126B OS=Homo sapiens GN=TMEM126B - [T126B HUMAN]</a>                                           | 1,66 | 0,00 |
| O00468   | <a href="#">Agrin OS=Homo sapiens GN=AGRN PE=1 SV=4 - [AGRIN HUMAN]</a>                                                                       | 1,68 | 0,00 |
| Q03405-2 | <a href="#">Isoform 2 of Urokinase plasminogen activator surface receptor OS=Homo sapiens GN=PLAUR - [UPAR HUMAN]</a>                         | 1,68 | 0,00 |
| Q9C0B5-2 | <a href="#">Isoform 2 of Palmitoyltransferase ZDHHC5 OS=Homo sapiens GN=ZDHHC5 - [ZDHC5 HUMAN]</a>                                            | 1,71 | 0,00 |
| Q15149-5 | <a href="#">Isoform 5 of Plectin OS=Homo sapiens GN=PLEC - [PLEC HUMAN]</a>                                                                   | 1,96 | 0,00 |
| Q5TAQ9-2 | <a href="#">Isoform 2 of DDB1- and CUL4-associated factor 8 OS=Homo sapiens GN=DCAF8 - [DCAF8 HUMAN]</a>                                      | 1,64 | 0,00 |
| P02538   | <a href="#">Keratin, type II cytoskeletal 6A OS=Homo sapiens GN=KRT6A PE=1 SV=3 - [K2C6A HUMAN]</a>                                           | 2,77 | 0,00 |
| Q7L5N1   | <a href="#">COP9 signalosome complex subunit 6 OS=Homo sapiens GN=COPS6 PE=1 SV=1 - [CSN6 HUMAN]</a>                                          | 1,41 | 0,00 |
| Q9UK99-3 | <a href="#">Isoform 3 of F-box only protein 3 OS=Homo sapiens GN=FBXO3 - [FBX3 HUMAN]</a>                                                     | 1,71 | 0,00 |
| O95197-2 | <a href="#">Isoform 2 of Reticulon-3 OS=Homo sapiens GN=RTN3 - [RTN3 HUMAN]</a>                                                               | 1,61 | 0,00 |
| O94762   | <a href="#">ATP-dependent DNA helicase Q5 OS=Homo sapiens GN=RECQL5 PE=1 SV=2 - [RECQ5 HUMAN]</a>                                             | 1,57 | 0,00 |
| Q8TA86   | <a href="#">Retinitis pigmentosa 9 protein OS=Homo sapiens GN=RP9 PE=1 SV=2 - [RP9 HUMAN]</a>                                                 | 1,31 | 0,00 |
| Q86XE3   | <a href="#">EF-hand domain-containing family member A2 OS=Homo sapiens GN=EFHA2 PE=2 SV=1 - [EFHA2 HUMAN]</a>                                 | 1,71 | 0,00 |
| P55795   | <a href="#">Heterogeneous nuclear ribonucleoprotein H2 OS=Homo sapiens GN=HNRNPH2 PE=1 SV=1 - [HNRH2 HUMAN]</a>                               | 1,49 | 0,00 |
| O00443   | <a href="#">Phosphatidylinositol-4-phosphate 3-kinase C2 domain-containing subunit alpha OS=Homo sapiens GN=PIK3C2A PE=1 SV=1 - [PIK3C2A]</a> | 1,44 | 0,00 |
| Q5BJH7-3 | <a href="#">Isoform 3 of Protein YIF1B OS=Homo sapiens GN=YIF1B - [YIF1B HUMAN]</a>                                                           | 1,76 | 0,00 |
| P04040   | <a href="#">Catalase OS=Homo sapiens GN=CAT PE=1 SV=3 - [CATA HUMAN]</a>                                                                      | 1,65 | 0,00 |

## A375 vs. A375VR4

|          |                                                                                                                                 |        |      |
|----------|---------------------------------------------------------------------------------------------------------------------------------|--------|------|
| Q6UXD5-3 | <a href="#">Isoform 3 of Seizure 6-like protein 2 OS=Homo sapiens GN=SEZ6L2 - [SE6L2 HUMAN]</a>                                 | 1,49   | 0,00 |
| Q9H6E5   | <a href="#">Speckle targeted PIP5K1A-regulated poly(A) polymerase OS=Homo sapiens GN=TUT1 PE=1 SV=2 - [STPAP HUMAN]</a>         | 1,40   | 0,00 |
| P23497-4 | <a href="#">Isoform Sp100-C of Nuclear autoantigen Sp-100 OS=Homo sapiens GN=SP100 - [SP100 HUMAN]</a>                          | 2,19   | 0,00 |
| Q6UW63   | <a href="#">KDEL motif-containing protein 1 OS=Homo sapiens GN=KDEL1 PE=1 SV=1 - [KDEL1 HUMAN]</a>                              | 1,90   | 0,00 |
| Q9NSV4-1 | <a href="#">Isoform 1 of Protein diaphanous homolog 3 OS=Homo sapiens GN=DIAPH3 - [DIAP3 HUMAN]</a>                             | 1,78   | 0,00 |
| O43688   | <a href="#">Lipid phosphate phosphohydrolase 2 OS=Homo sapiens GN=PPAP2C PE=1 SV=1 - [LPP2 HUMAN]</a>                           | 1,80   | 0,00 |
| Q9BRU9   | <a href="#">rRNA-processing protein UTP23 homolog OS=Homo sapiens GN=UTP23 PE=2 SV=2 - [UTP23 HUMAN]</a>                        | 1,52   | 0,00 |
| Q96Q45-2 | <a href="#">Isoform 2 of Transmembrane protein 237 OS=Homo sapiens GN=TMEM237 - [TM237 HUMAN]</a>                               | 1,42   | 0,00 |
| Q9Y624   | <a href="#">Junctional adhesion molecule A OS=Homo sapiens GN=F11R PE=1 SV=1 - [JAM1 HUMAN]</a>                                 | 1,98   | 0,00 |
| Q9H9G7-2 | <a href="#">Isoform 2 of Protein argonaute-3 OS=Homo sapiens GN=EIF2C3 - [AGO3 HUMAN]</a>                                       | 1,41   | 0,00 |
| Q68CQ7   | <a href="#">Glycosyltransferase 8 domain-containing protein 1 OS=Homo sapiens GN=GLT8D1 PE=1 SV=2 - [GL8D1 HUMAN]</a>           | 2,22   | 0,00 |
| O14686   | <a href="#">Histone-lysine N-methyltransferase MLL2 OS=Homo sapiens GN=MLL2 PE=1 SV=2 - [MLL2 HUMAN]</a>                        | 1,56   | 0,00 |
| Q9Y5Y5   | <a href="#">Peroxisomal membrane protein PEX16 OS=Homo sapiens GN=PEX16 PE=1 SV=2 - [PEX16 HUMAN]</a>                           | 1,74   | 0,00 |
| Q9BWS9-3 | <a href="#">Isoform 3 of Chitinase domain-containing protein 1 OS=Homo sapiens GN=CHID1 - [CHID1 HUMAN]</a>                     | 1,61   | 0,00 |
| Q14534   | <a href="#">Squalene monooxygenase OS=Homo sapiens GN=SQLE PE=2 SV=3 - [ERG1 HUMAN]</a>                                         | 1,28   | 0,00 |
| O14684   | <a href="#">Prostaglandin E synthase OS=Homo sapiens GN=PTGES PE=1 SV=2 - [PTGES HUMAN]</a>                                     | 127,17 | 0,00 |
| P29323-2 | <a href="#">Isoform 2 of Ephrin type-B receptor 2 OS=Homo sapiens GN=EPHB2 - [EPHB2 HUMAN]</a>                                  | 1,74   | 0,00 |
| Q9BUA3   | <a href="#">Uncharacterized protein C11orf84 OS=Homo sapiens GN=C11orf84 PE=1 SV=3 - [CK084 HUMAN]</a>                          | 1,36   | 0,00 |
| P09493-5 | <a href="#">Isoform 5 of Tropomyosin alpha-1 chain OS=Homo sapiens GN=TPM1 - [TPM1 HUMAN]</a>                                   | 1,34   | 0,00 |
| P62136   | <a href="#">Serine/threonine-protein phosphatase PP1-alpha catalytic subunit OS=Homo sapiens GN=PPP1CA PE=1 SV=1 - [PP1A]</a>   | 1,26   | 0,00 |
| Q6WCQ1-2 | <a href="#">Isoform 2 of Myosin phosphatase Rho-interacting protein OS=Homo sapiens GN=MPRIP - [MPRIP HUMAN]</a>                | 1,33   | 0,00 |
| P78356   | <a href="#">Phosphatidylinositol-5-phosphate 4-kinase type-2 beta OS=Homo sapiens GN=PIP4K2B PE=1 SV=1 - [PI42B HUMAN]</a>      | 1,44   | 0,00 |
| Q8N684-2 | <a href="#">Isoform 2 of Cleavage and polyadenylation specificity factor subunit 7 OS=Homo sapiens GN=CPSF7 - [CPSF7 HUMAN]</a> | 1,54   | 0,00 |
| P49768-2 | <a href="#">Isoform 2 of Presenilin-1 OS=Homo sapiens GN=PSEN1 - [PSN1 HUMAN]</a>                                               | 1,54   | 0,00 |
| Q9H173   | <a href="#">Nucleotide exchange factor SIL1 OS=Homo sapiens GN=SIL1 PE=1 SV=1 - [SIL1 HUMAN]</a>                                | 1,60   | 0,00 |
| Q8IWE4   | <a href="#">DCN1-like protein 3 OS=Homo sapiens GN=DCUN1D3 PE=2 SV=1 - [DCNL3 HUMAN]</a>                                        | 1,60   | 0,00 |
| Q6XQN6-3 | <a href="#">Isoform 3 of Nicotinate phosphoribosyltransferase OS=Homo sapiens GN=NAPRT1 - [PNCB HUMAN]</a>                      | 48,20  | 0,00 |
| P05165-2 | <a href="#">Isoform 2 of Propionyl-CoA carboxylase alpha chain, mitochondrial OS=Homo sapiens GN=PCCA - [PCCA HUMAN]</a>        | 1,71   | 0,00 |
| Q8WVM8   | <a href="#">Sec1 family domain-containing protein 1 OS=Homo sapiens GN=SCFD1 PE=1 SV=4 - [SCFD1 HUMAN]</a>                      | 1,49   | 0,00 |
| Q8N138-4 | <a href="#">Isoform 2 of ORM1-like protein 3 OS=Homo sapiens GN=ORMDL3 - [ORML3 HUMAN]</a>                                      | 1,61   | 0,00 |
| Q9Y3E1   | <a href="#">Hepatoma-derived growth factor-related protein 3 OS=Homo sapiens GN=HDGFRP3 PE=1 SV=1 - [HDGR3 HUMAN]</a>           | 1,42   | 0,00 |
| P08174   | <a href="#">Complement decay-accelerating factor OS=Homo sapiens GN=CD55 PE=1 SV=4 - [DAF HUMAN]</a>                            | 1,94   | 0,00 |
| Q9Y256   | <a href="#">CAAX prenyl protease 2 OS=Homo sapiens GN=RCE1 PE=1 SV=1 - [FACE2 HUMAN]</a>                                        | 1,80   | 0,00 |



## A375 vs. A375VR4

|          |                                                                                                                             |       |      |
|----------|-----------------------------------------------------------------------------------------------------------------------------|-------|------|
| Q14112-2 | <a href="#">Isoform 2 of Nidogen-2 OS=Homo sapiens GN=NID2 - [NID2 HUMAN]</a>                                               | 1,33  | 0,00 |
| Q14108   | <a href="#">Lysosome membrane protein 2 OS=Homo sapiens GN=SCARB2 PE=1 SV=2 - [SCRB2 HUMAN]</a>                             | 1,73  | 0,00 |
| Q9Y5L4   | <a href="#">Mitochondrial import inner membrane translocase subunit Tim13 OS=Homo sapiens GN=TIMM13 PE=1 SV=1 - [TIM1</a>   | 1,60  | 0,00 |
| P02794   | <a href="#">Ferritin heavy chain OS=Homo sapiens GN=FTH1 PE=1 SV=2 - [FRIH HUMAN]</a>                                       | 1,70  | 0,00 |
| Q27J81-2 | <a href="#">Isoform 2 of Inverted formin-2 OS=Homo sapiens GN=INF2 - [INF2 HUMAN]</a>                                       | 1,34  | 0,00 |
| Q96MX0   | <a href="#">CKLF-like MARVEL transmembrane domain-containing protein 3 OS=Homo sapiens GN=CMTM3 PE=2 SV=1 - [CKLF3 ]</a>    | 1,70  | 0,00 |
| Q15170-2 | <a href="#">Isoform 2 of Transcription elongation factor A protein-like 1 OS=Homo sapiens GN=TCEAL1 - [TCAL1 HUMAN]</a>     | 1,37  | 0,00 |
| Q8N9N2-2 | <a href="#">Isoform 2 of Activating signal cointegrator 1 complex subunit 1 OS=Homo sapiens GN=ASCC1 - [ASCC1 HUMAN]</a>    | 1,45  | 0,00 |
| Q9H1C4   | <a href="#">Protein unc-93 homolog B1 OS=Homo sapiens GN=UNC93B1 PE=1 SV=2 - [UN93B HUMAN]</a>                              | 1,48  | 0,00 |
| Q86UL8-2 | <a href="#">Isoform 2 of Membrane-associated guanylate kinase, WW and PDZ domain-containing protein 2 OS=Homo sapiens G</a> | 51,36 | 0,00 |
| Q86W92-2 | <a href="#">Isoform 2 of Liprin-beta-1 OS=Homo sapiens GN=PPFIBP1 - [LIPB1 HUMAN]</a>                                       | 1,61  | 0,00 |
| Q9NP84   | <a href="#">Tumor necrosis factor receptor superfamily member 12A OS=Homo sapiens GN=TNFRSF12A PE=1 SV=1 - [TNR12 HU</a>    | 1,70  | 0,00 |
| Q9UI43   | <a href="#">Putative ribosomal RNA methyltransferase 2 OS=Homo sapiens GN=FTSJ2 PE=1 SV=1 - [RRMJ2 HUMAN]</a>               | 1,31  | 0,00 |
| Q9H4L5-2 | <a href="#">Isoform 1b of Oxysterol-binding protein-related protein 3 OS=Homo sapiens GN=OSBPL3 - [OSBL3 HUMAN]</a>         | 1,32  | 0,00 |
| Q68DH5   | <a href="#">LMBR1 domain-containing protein 2 OS=Homo sapiens GN=LMBRD2 PE=1 SV=1 - [LMBD2 HUMAN]</a>                       | 1,51  | 0,00 |
| Q7Z739   | <a href="#">YTH domain family protein 3 OS=Homo sapiens GN=YTHDF3 PE=1 SV=1 - [YTHD3 HUMAN]</a>                             | 1,56  | 0,12 |
| Q8NFJ5   | <a href="#">Retinoic acid-induced protein 3 OS=Homo sapiens GN=GPRC5A PE=1 SV=2 - [RAI3 HUMAN]</a>                          | 2,51  | 0,12 |
| Q8WUJ3-2 | <a href="#">Isoform 2 of Protein KIAA1199 OS=Homo sapiens GN=KIAA1199 - [K1199 HUMAN]</a>                                   | 1,44  | 0,12 |
| Q96IG2-2 | <a href="#">Isoform 2 of F-box/LRR-repeat protein 20 OS=Homo sapiens GN=FBXL20 - [FXL20 HUMAN]</a>                          | 1,63  | 0,12 |
| Q9Y2K6   | <a href="#">Ubiquitin carboxyl-terminal hydrolase 20 OS=Homo sapiens GN=USP20 PE=1 SV=2 - [UBP20 HUMAN]</a>                 | 1,89  | 0,12 |
| Q9NZ56   | <a href="#">Formin-2 OS=Homo sapiens GN=FMN2 PE=1 SV=4 - [FMN2 HUMAN]</a>                                                   | 1,55  | 0,12 |
| Q14103-3 | <a href="#">Isoform 3 of Heterogeneous nuclear ribonucleoprotein D0 OS=Homo sapiens GN=HNRNPD - [HNRPD HUMAN]</a>           | 1,55  | 0,12 |
| Q8IUF8-4 | <a href="#">Isoform 4 of MYC-induced nuclear antigen OS=Homo sapiens GN=MINA - [MINA HUMAN]</a>                             | 1,36  | 0,12 |
| P30443   | <a href="#">HLA class I histocompatibility antigen, A-1 alpha chain OS=Homo sapiens GN=HLA-A PE=1 SV=1 - [1A01 HUMAN]</a>   | 1,21  | 0,12 |
| Q16832   | <a href="#">Discoidin domain-containing receptor 2 OS=Homo sapiens GN=DDR2 PE=1 SV=2 - [DDR2 HUMAN]</a>                     | 1,95  | 0,12 |
| Q7Z2T5   | <a href="#">TRMT1-like protein OS=Homo sapiens GN=TRMT1L PE=1 SV=2 - [TRM1L HUMAN]</a>                                      | 1,40  | 0,12 |
| Q8NB14   | <a href="#">Ubiquitin carboxyl-terminal hydrolase 38 OS=Homo sapiens GN=USP38 PE=2 SV=2 - [UBP38 HUMAN]</a>                 | 1,40  | 0,12 |
| P42166   | <a href="#">Lamina-associated polypeptide 2, isoform alpha OS=Homo sapiens GN=TMPO PE=1 SV=2 - [LAP2A HUMAN]</a>            | 1,86  | 0,12 |
| Q9H813   | <a href="#">Transmembrane protein 206 OS=Homo sapiens GN=TMEM206 PE=1 SV=1 - [TM206 HUMAN]</a>                              | 1,33  | 0,12 |
| Q6PIJ6-3 | <a href="#">Isoform 3 of F-box only protein 38 OS=Homo sapiens GN=FBXO38 - [FBX38 HUMAN]</a>                                | 1,59  | 0,12 |
| O43464-2 | <a href="#">Isoform 2 of Serine protease HTRA2, mitochondrial OS=Homo sapiens GN=HTRA2 - [HTRA2 HUMAN]</a>                  | 1,69  | 0,12 |
| O95159   | <a href="#">Zinc finger protein-like 1 OS=Homo sapiens GN=ZFPL1 PE=1 SV=2 - [ZFPL1 HUMAN]</a>                               | 1,72  | 0,12 |
| Q8IXT5   | <a href="#">RNA-binding protein 12B OS=Homo sapiens GN=RBM12B PE=1 SV=2 - [RB12B HUMAN]</a>                                 | 1,64  | 0,12 |

## A375 vs. A375VR4

|          |                                                                                                                                             |         |      |
|----------|---------------------------------------------------------------------------------------------------------------------------------------------|---------|------|
| Q13190-2 | <a href="#">Isoform 2 of Syntaxin-5 OS=Homo sapiens GN=STX5 - [STX5 HUMAN]</a>                                                              | 1,50    | 0,12 |
| A6NP61   | <a href="#">ZAR1-like protein OS=Homo sapiens GN=ZAR1L PE=2 SV=2 - [ZAR1L HUMAN]</a>                                                        | 2,44    | 0,12 |
| Q8NBQ5   | <a href="#">Estradiol 17-beta-dehydrogenase 11 OS=Homo sapiens GN=HSD17B11 PE=1 SV=3 - [DHB11 HUMAN]</a>                                    | 2,16    | 0,12 |
| Q9H7D7-2 | <a href="#">Isoform 2 of WD repeat-containing protein 26 OS=Homo sapiens GN=WDR26 - [WDR26 HUMAN]</a>                                       | 1,40    | 0,12 |
| Q8TAD7   | <a href="#">Overexpressed in colon carcinoma 1 protein OS=Homo sapiens GN=OCC1 PE=1 SV=2 - [OCC1 HUMAN]</a>                                 | 1,70    | 0,12 |
| P17677   | <a href="#">Neuromodulin OS=Homo sapiens GN=GAP43 PE=1 SV=1 - [NEUM HUMAN]</a>                                                              | 1,27    | 0,12 |
| P02766   | <a href="#">Transthyretin OS=Homo sapiens GN=TTR PE=1 SV=1 - [TTHY HUMAN]</a>                                                               | 2,63    | 0,12 |
| Q9P246   | <a href="#">Stromal interaction molecule 2 OS=Homo sapiens GN=STIM2 PE=1 SV=2 - [STIM2 HUMAN]</a>                                           | 1,54    | 0,12 |
| O14786   | <a href="#">Neuropilin-1 OS=Homo sapiens GN=NRP1 PE=1 SV=3 - [NRP1 HUMAN]</a>                                                               | 1,53    | 0,12 |
| Q05193-3 | <a href="#">Isoform 3 of Dynamin-1 OS=Homo sapiens GN=DNM1 - [DYN1 HUMAN]</a>                                                               | 1,39    | 0,12 |
| Q5QP82-2 | <a href="#">Isoform 2 of DDB1- and CUL4-associated factor 10 OS=Homo sapiens GN=DCAF10 - [DCA10 HUMAN]</a>                                  | 1,54    | 0,12 |
| Q9HAT2-2 | <a href="#">Isoform 2 of Sialate O-acetyltransferase OS=Homo sapiens GN=SIAE - [SIAE HUMAN]</a>                                             | 1,59    | 0,12 |
| P61018   | <a href="#">Ras-related protein Rab-4B OS=Homo sapiens GN=RAB4B PE=1 SV=1 - [RAB4B HUMAN]</a>                                               | 1,53    | 0,12 |
| Q5BKT4   | <a href="#">Dol-P-Glc:Glc(2)Man(9)GlcNAc(2)-PP-Dol alpha-1,2-glucosyltransferase OS=Homo sapiens GN=ALG10 PE=1 SV=1 - [ALG10 HUMAN]</a>     | 1,82    | 0,12 |
| Q5T5Y3   | <a href="#">Calmodulin-regulated spectrin-associated protein 1 OS=Homo sapiens GN=CAMSAP1 PE=1 SV=2 - [CAMP1 HUMAN]</a>                     | 1,42    | 0,12 |
| P05114   | <a href="#">Non-histone chromosomal protein HMG-14 OS=Homo sapiens GN=HMG1 PE=1 SV=3 - [HMG1 HUMAN]</a>                                     | 1,46    | 0,12 |
| Q8WV74-2 | <a href="#">Isoform 2 of Nucleoside diphosphate-linked moiety X motif 8, mitochondrial OS=Homo sapiens GN=NUDT8 - [NUDT8 HUMAN]</a>         | 1,52    | 0,12 |
| Q8IWT6   | <a href="#">Leucine-rich repeat-containing protein 8A OS=Homo sapiens GN=LRR8A PE=1 SV=1 - [LRC8A HUMAN]</a>                                | 1,45    | 0,12 |
| P13994   | <a href="#">Coiled-coil domain-containing protein 130 OS=Homo sapiens GN=CCDC130 PE=1 SV=2 - [CC130 HUMAN]</a>                              | 1,31    | 0,12 |
| Q96T83   | <a href="#">Sodium/hydrogen exchanger 7 OS=Homo sapiens GN=SLC9A7 PE=1 SV=1 - [SL9A7 HUMAN]</a>                                             | 1,35    | 0,12 |
| Q15059   | <a href="#">Bromodomain-containing protein 3 OS=Homo sapiens GN=BRD3 PE=1 SV=1 - [BRD3 HUMAN]</a>                                           | 1,38    | 0,12 |
| A2RUB6-3 | <a href="#">Isoform 3 of Coiled-coil domain-containing protein 66 OS=Homo sapiens GN=CCDC66 - [CCD66 HUMAN]</a>                             | 1107,94 | 0,12 |
| Q5M775-4 | <a href="#">Isoform 4 of Cytospin-B OS=Homo sapiens GN=SPECC1 - [CYTSB HUMAN]</a>                                                           | 1,49    | 0,12 |
| Q5VYJ5   | <a href="#">MAM and LDL-receptor class A domain-containing protein C10orf112 OS=Homo sapiens GN=C10orf112 PE=2 SV=3 - [C10orf112 HUMAN]</a> | 1,51    | 0,12 |
| Q9BQ69   | <a href="#">MACRO domain-containing protein 1 OS=Homo sapiens GN=MACROD1 PE=1 SV=2 - [MACD1 HUMAN]</a>                                      | 1,34    | 0,12 |
| P35527   | <a href="#">Keratin, type I cytoskeletal 9 OS=Homo sapiens GN=KRT9 PE=1 SV=3 - [K1C9 HUMAN]</a>                                             | 1,88    | 0,12 |
| Q6YN16-2 | <a href="#">Isoform 2 of Hydroxysteroid dehydrogenase-like protein 2 OS=Homo sapiens GN=HSDL2 - [HSDL2 HUMAN]</a>                           | 1,44    | 0,12 |
| O15226   | <a href="#">NF-kappa-B-repressing factor OS=Homo sapiens GN=NKRF PE=1 SV=2 - [NKRF HUMAN]</a>                                               | 1,69    | 0,12 |
| Q6UW78   | <a href="#">UPF0723 protein C11orf83 OS=Homo sapiens GN=C11orf83 PE=1 SV=2 - [CK083 HUMAN]</a>                                              | 1,69    | 0,12 |
| Q86VD7   | <a href="#">Solute carrier family 25 member 42 OS=Homo sapiens GN=SLC25A42 PE=1 SV=2 - [S2542 HUMAN]</a>                                    | 1,69    | 0,12 |
| Q5NDL2-3 | <a href="#">Isoform 3 of Uncharacterized glycosyltransferase AER61 OS=Homo sapiens GN=AER61 - [AER61 HUMAN]</a>                             | 1,44    | 0,12 |
| P48960-2 | <a href="#">Isoform 2 of CD97 antigen OS=Homo sapiens GN=CD97 - [CD97 HUMAN]</a>                                                            | 1,55    | 0,12 |
| Q9NUP9   | <a href="#">Protein lin-7 homolog C OS=Homo sapiens GN=LIN7C PE=1 SV=1 - [LIN7C HUMAN]</a>                                                  | 1,30    | 0,12 |

## A375 vs. A375VR4

|          |                                                                                                                               |              |      |
|----------|-------------------------------------------------------------------------------------------------------------------------------|--------------|------|
| Q8TB37-2 | <a href="#">Isoform 2 of Iron-sulfur protein NUBPL OS=Homo sapiens GN=NUBPL - [NUBPL HUMAN]</a>                               | 1,37         | 0,12 |
| O00488   | <a href="#">Zinc finger protein 593 OS=Homo sapiens GN=ZNF593 PE=1 SV=2 - [ZN593 HUMAN]</a>                                   | 1,39         | 0,12 |
| O60762   | <a href="#">Dolichol-phosphate mannosyltransferase OS=Homo sapiens GN=DPM1 PE=1 SV=1 - [DPM1 HUMAN]</a>                       | 1,63         | 0,12 |
| Q16877   | <a href="#">6-phosphofructo-2-kinase/fructose-2,6-biphosphatase 4 OS=Homo sapiens GN=PFKFB4 PE=2 SV=6 - [F264 HUMAN]</a>      | 1,28         | 0,12 |
| Q6IPR1   | <a href="#">LYR motif-containing protein 5 OS=Homo sapiens GN=LYRM5 PE=2 SV=1 - [LYRM5 HUMAN]</a>                             | 1,45         | 0,12 |
| Q15771   | <a href="#">Ras-related protein Rab-30 OS=Homo sapiens GN=RAB30 PE=1 SV=2 - [RAB30 HUMAN]</a>                                 | 1,68         | 0,12 |
| Q709F0-3 | <a href="#">Isoform 3 of Acyl-CoA dehydrogenase family member 11 OS=Homo sapiens GN=ACAD11 - [ACD11 HUMAN]</a>                | 1,49         | 0,12 |
| Q0VAQ4   | <a href="#">Small cell adhesion glycoprotein OS=Homo sapiens GN=SMAGP PE=1 SV=1 - [SMAGP HUMAN]</a>                           | 1,30         | 0,12 |
| Q9UMX1   | <a href="#">Suppressor of fused homolog OS=Homo sapiens GN=SUFU PE=1 SV=2 - [SUFU HUMAN]</a>                                  | 1,32         | 0,12 |
| Q14103-4 | <a href="#">Isoform 4 of Heterogeneous nuclear ribonucleoprotein D0 OS=Homo sapiens GN=HNRNPD - [HNRPD HUMAN]</a>             | 1,42         | 0,12 |
| Q6N075   | <a href="#">Major facilitator superfamily domain-containing protein 5 OS=Homo sapiens GN=MFSD5 PE=2 SV=2 - [MFSD5 HUMA]</a>   | 1,35         | 0,12 |
| P17252   | <a href="#">Protein kinase C alpha type OS=Homo sapiens GN=PRKCA PE=1 SV=4 - [KPCA HUMAN]</a>                                 | 1,72         | 0,12 |
| Q8N9R8   | <a href="#">Protein SCAI OS=Homo sapiens GN=SCAI PE=1 SV=2 - [SCAI HUMAN]</a>                                                 | 1,38         | 0,12 |
| Q03135   | <a href="#">Caveolin-1 OS=Homo sapiens GN=CAV1 PE=1 SV=4 - [CAV1 HUMAN]</a>                                                   | 2,01         | 0,12 |
| Q9Y3Q7-2 | <a href="#">Isoform 2 of Disintegrin and metalloproteinase domain-containing protein 18 OS=Homo sapiens GN=ADAM18 - [ADA]</a> | 537719,75    | 0,12 |
| Q9NXS2   | <a href="#">Glutaminyl-peptide cyclotransferase-like protein OS=Homo sapiens GN=QPCTL PE=1 SV=2 - [QPCTL HUMAN]</a>           | 1,40         | 0,12 |
| P05141   | <a href="#">ADP/ATP translocase 2 OS=Homo sapiens GN=SLC25A5 PE=1 SV=7 - [ADT2 HUMAN]</a>                                     | 1,64         | 0,12 |
| P23743   | <a href="#">Diacylglycerol kinase alpha OS=Homo sapiens GN=DGKA PE=1 SV=3 - [DGKA HUMAN]</a>                                  | 2,70         | 0,12 |
| Q9NVV0   | <a href="#">Trimeric intracellular cation channel type B OS=Homo sapiens GN=TMEM38B PE=1 SV=1 - [TM38B HUMAN]</a>             | 1,45         | 0,12 |
| Q9UDY4   | <a href="#">DnaJ homolog subfamily B member 4 OS=Homo sapiens GN=DNAJB4 PE=1 SV=1 - [DNJB4 HUMAN]</a>                         | 1,54         | 0,12 |
| Q6PJQ5   | <a href="#">Forkhead box protein R2 OS=Homo sapiens GN=FOXR2 PE=2 SV=1 - [FOXR2 HUMAN]</a>                                    | 1,55         | 0,12 |
| Q9Y2J2-2 | <a href="#">Isoform B of Band 4,1-like protein 3 OS=Homo sapiens GN=EPB41L3 - [E41L3 HUMAN]</a>                               | 1,51         | 0,12 |
| P05423   | <a href="#">DNA-directed RNA polymerase III subunit RPC4 OS=Homo sapiens GN=POLR3D PE=1 SV=2 - [RPC4 HUMAN]</a>               | 1,39         | 0,12 |
| Q9BTX3   | <a href="#">Transmembrane protein 208 OS=Homo sapiens GN=TMEM208 PE=2 SV=1 - [TM208 HUMAN]</a>                                | 1,37         | 0,12 |
| P32004-2 | <a href="#">Isoform 2 of Neural cell adhesion molecule L1 OS=Homo sapiens GN=L1CAM - [L1CAM HUMAN]</a>                        | 3,53         | 0,12 |
| P08779   | <a href="#">Keratin, type I cytoskeletal 16 OS=Homo sapiens GN=KRT16 PE=1 SV=4 - [K1C16 HUMAN]</a>                            | 1,86         | 0,18 |
| Q96DB5   | <a href="#">Regulator of microtubule dynamics protein 1 OS=Homo sapiens GN=FAM82B PE=1 SV=1 - [RMD1 HUMAN]</a>                | 1,38         | 0,18 |
| Q9Y5U2-2 | <a href="#">Isoform 2 of Protein TSSC4 OS=Homo sapiens GN=TSSC4 - [TSSC4 HUMAN]</a>                                           | 1,53         | 0,18 |
| O00186   | <a href="#">Syntaxin-binding protein 3 OS=Homo sapiens GN=STXBP3 PE=1 SV=2 - [STXB3 HUMAN]</a>                                | 1,46         | 0,18 |
| Q9UPA5   | <a href="#">Protein bassoon OS=Homo sapiens GN=BSN PE=1 SV=4 - [BSN HUMAN]</a>                                                | 454776773,47 | 0,18 |
| Q9UHR6   | <a href="#">Zinc finger HIT domain-containing protein 2 OS=Homo sapiens GN=ZNHIT2 PE=1 SV=1 - [ZNHI2 HUMAN]</a>               | 1,35         | 0,18 |
| Q5SWX8   | <a href="#">Protein odr-4 homolog OS=Homo sapiens GN=ODR4 PE=2 SV=1 - [ODR4 HUMAN]</a>                                        | 1,50         | 0,18 |
| Q969M1   | <a href="#">Mitochondrial import receptor subunit TOM40B OS=Homo sapiens GN=TOMM40L PE=2 SV=1 - [TM40L HUMAN]</a>             | 1,35         | 0,18 |

## A375 vs. A375VR4

|          |                                                                                                                                                     |        |      |
|----------|-----------------------------------------------------------------------------------------------------------------------------------------------------|--------|------|
| Q9NQ34   | <a href="#">Transmembrane protein 9B OS=Homo sapiens GN=TMEM9B PE=1 SV=1 - [TMM9B_HUMAN]</a>                                                        | 1,39   | 0,18 |
| Q96I24   | <a href="#">Far upstream element-binding protein 3 OS=Homo sapiens GN=FUBP3 PE=1 SV=2 - [FUBP3_HUMAN]</a>                                           | 1,40   | 0,18 |
| Q86YF9-2 | <a href="#">Isoform 2 of Zinc finger protein DZIP1 OS=Homo sapiens GN=DZIP1 - [DZIP1_HUMAN]</a>                                                     | 192,29 | 0,18 |
| Q9Y6H1   | <a href="#">Coiled-coil-helix-coiled-coil-helix domain-containing protein 2, mitochondrial OS=Homo sapiens GN=CHCHD2 PE=1 SV=1 - [CHCHD2_HUMAN]</a> | 1,49   | 0,18 |
| Q9Y394-2 | <a href="#">Isoform 2 of Dehydrogenase/reductase SDR family member 7 OS=Homo sapiens GN=DHRS7 - [DHRS7_HUMAN]</a>                                   | 1,58   | 0,18 |
| Q6NUK1   | <a href="#">Calcium-binding mitochondrial carrier protein SCaMC-1 OS=Homo sapiens GN=SLC25A24 PE=1 SV=2 - [SCMC1_HUMAN]</a>                         | 1,62   | 0,18 |
| O75531   | <a href="#">Barrier-to-autointegration factor OS=Homo sapiens GN=BANF1 PE=1 SV=1 - [BAF_HUMAN]</a>                                                  | 1,32   | 0,18 |
| Q9ULI2   | <a href="#">Beta-citryl-glutamate synthase B OS=Homo sapiens GN=RIMKLB PE=2 SV=2 - [RIMKB_HUMAN]</a>                                                | 1,35   | 0,18 |
| P62072   | <a href="#">Mitochondrial import inner membrane translocase subunit Tim10 OS=Homo sapiens GN=TIMM10 PE=1 SV=1 - [TIM10_HUMAN]</a>                   | 1,41   | 0,18 |
| O00622   | <a href="#">Protein CYR61 OS=Homo sapiens GN=CYR61 PE=1 SV=1 - [CYR61_HUMAN]</a>                                                                    | 2,21   | 0,18 |
| Q9C086   | <a href="#">INO80 complex subunit B OS=Homo sapiens GN=INO80B PE=1 SV=2 - [IN80B_HUMAN]</a>                                                         | 1,32   | 0,18 |
| Q13510   | <a href="#">Acid ceramidase OS=Homo sapiens GN=ASAH1 PE=1 SV=5 - [ASAH1_HUMAN]</a>                                                                  | 1,35   | 0,18 |
| Q9BZI7-2 | <a href="#">Isoform 2 of Regulator of nonsense transcripts 3B OS=Homo sapiens GN=UPF3B - [REN3B_HUMAN]</a>                                          | 1,36   | 0,18 |
| Q12805-2 | <a href="#">Isoform 2 of EGF-containing fibulin-like extracellular matrix protein 1 OS=Homo sapiens GN=EFEMP1 - [FBLN3_HUMAN]</a>                   | 1,45   | 0,18 |
| Q6PIU2   | <a href="#">Neutral cholesterol ester hydrolase 1 OS=Homo sapiens GN=NCEH1 PE=1 SV=3 - [NCEH1_HUMAN]</a>                                            | 1,66   | 0,18 |
| Q9H160   | <a href="#">Inhibitor of growth protein 2 OS=Homo sapiens GN=ING2 PE=1 SV=2 - [ING2_HUMAN]</a>                                                      | 1,51   | 0,18 |
| Q8NE86-3 | <a href="#">Isoform 3 of Calcium uniporter protein, mitochondrial OS=Homo sapiens GN=MCU - [MCU_HUMAN]</a>                                          | 1,70   | 0,18 |
| Q86UU0-3 | <a href="#">Isoform 3 of B-cell CLL/lymphoma 9-like protein OS=Homo sapiens GN=BCL9L - [BCL9L_HUMAN]</a>                                            | 1,67   | 0,18 |
| Q9P2Y4   | <a href="#">Zinc finger protein 219 OS=Homo sapiens GN=ZNF219 PE=1 SV=2 - [ZN219_HUMAN]</a>                                                         | 1,24   | 0,18 |
| Q8N8Q8   | <a href="#">Mitochondrial inner membrane protein COX18 OS=Homo sapiens GN=COX18 PE=2 SV=1 - [COX18_HUMAN]</a>                                       | 1,37   | 0,18 |
| Q8IZR5-3 | <a href="#">Isoform 3 of CKLF-like MARVEL transmembrane domain-containing protein 4 OS=Homo sapiens GN=CMTM4 - [CKLF4_HUMAN]</a>                    | 1,57   | 0,18 |
| Q07617   | <a href="#">Sperm-associated antigen 1 OS=Homo sapiens GN=SPAG1 PE=1 SV=3 - [SPAG1_HUMAN]</a>                                                       | 1,37   | 0,18 |
| Q68CR1-3 | <a href="#">Isoform 3 of Protein sel-1 homolog 3 OS=Homo sapiens GN=SEL1L3 - [SE1L3_HUMAN]</a>                                                      | 2,02   | 0,18 |
| Q8IY33-3 | <a href="#">Isoform 3 of MICAL-like protein 2 OS=Homo sapiens GN=MICAL2 - [MILK2_HUMAN]</a>                                                         | 1,45   | 0,18 |
| P53680-2 | <a href="#">Isoform 2 of AP-2 complex subunit sigma OS=Homo sapiens GN=AP2S1 - [AP2S1_HUMAN]</a>                                                    | 1,26   | 0,18 |
| Q9BSD7   | <a href="#">Cancer-related nucleoside-triphosphatase OS=Homo sapiens GN=NTPCR PE=1 SV=1 - [NTPCR_HUMAN]</a>                                         | 1,55   | 0,18 |
| Q86SQ0-2 | <a href="#">Isoform 2 of Pleckstrin homology-like domain family B member 2 OS=Homo sapiens GN=PHLDB2 - [PHLB2_HUMAN]</a>                            | 1,29   | 0,18 |
| Q9UDW1   | <a href="#">Cytochrome b-c1 complex subunit 9 OS=Homo sapiens GN=UQCR10 PE=1 SV=3 - [QCR9_HUMAN]</a>                                                | 1,38   | 0,18 |
| P33897   | <a href="#">ATP-binding cassette sub-family D member 1 OS=Homo sapiens GN=ABCD1 PE=1 SV=2 - [ABCD1_HUMAN]</a>                                       | 1,59   | 0,18 |
| Q9Y657   | <a href="#">Spindlin-1 OS=Homo sapiens GN=SPIN1 PE=1 SV=3 - [SPIN1_HUMAN]</a>                                                                       | 1,56   | 0,18 |
| Q07157   | <a href="#">Tight junction protein ZO-1 OS=Homo sapiens GN=TJP1 PE=1 SV=3 - [ZO1_HUMAN]</a>                                                         | 1,39   | 0,18 |
| P35908   | <a href="#">Keratin, type II cytoskeletal 2 epidermal OS=Homo sapiens GN=KRT2 PE=1 SV=2 - [K22E_HUMAN]</a>                                          | 1,40   | 0,18 |
| P35658-2 | <a href="#">Isoform 2 of Nuclear pore complex protein Nup214 OS=Homo sapiens GN=NUP214 - [NU214_HUMAN]</a>                                          | 1,20   | 0,18 |

## A375 vs. A375VR4

|          |                                                                                                                                    |            |      |
|----------|------------------------------------------------------------------------------------------------------------------------------------|------------|------|
| Q99986   | <a href="#">Serine/threonine-protein kinase VRK1 OS=Homo sapiens GN=VRK1 PE=1 SV=1 - [VRK1_HUMAN]</a>                              | 1,22       | 0,18 |
| Q14332   | <a href="#">Frizzled-2 OS=Homo sapiens GN=FZD2 PE=2 SV=1 - [FZD2_HUMAN]</a>                                                        | 1,86       | 0,18 |
| P62699   | <a href="#">Protein yippee-like 5 OS=Homo sapiens GN=YPEL5 PE=2 SV=1 - [YPEL5_HUMAN]</a>                                           | 1,43       | 0,18 |
| Q9BZE2   | <a href="#">tRNA pseudouridine(38/39) synthase OS=Homo sapiens GN=PUS3 PE=1 SV=3 - [PUS3_HUMAN]</a>                                | 1,60       | 0,18 |
| O95236-2 | <a href="#">Isoform 2 of Apolipoprotein L3 OS=Homo sapiens GN=APOL3 - [APOL3_HUMAN]</a>                                            | 3600,95    | 0,18 |
| P53365   | <a href="#">Arfaptin-2 OS=Homo sapiens GN=ARFIP2 PE=1 SV=1 - [ARFP2_HUMAN]</a>                                                     | 1,74       | 0,18 |
| P55789   | <a href="#">FAD-linked sulfhydryl oxidase ALR OS=Homo sapiens GN=GFER PE=1 SV=2 - [ALR_HUMAN]</a>                                  | 1,44       | 0,18 |
| Q9Y5J7   | <a href="#">Mitochondrial import inner membrane translocase subunit Tim9 OS=Homo sapiens GN=TIMM9 PE=1 SV=1 - [TIM9_HUMAN]</a>     | 1,43       | 0,18 |
| Q8WV07   | <a href="#">Oral cancer-overexpressed protein 1 OS=Homo sapiens GN=ORAOV1 PE=2 SV=2 - [ORAV1_HUMAN]</a>                            | 1,54       | 0,18 |
| P41219   | <a href="#">Peripherin OS=Homo sapiens GN=PRPH PE=1 SV=2 - [PERI_HUMAN]</a>                                                        | 1024922,46 | 0,18 |
| P45973   | <a href="#">Chromobox protein homolog 5 OS=Homo sapiens GN=CBX5 PE=1 SV=1 - [CBX5_HUMAN]</a>                                       | 1,30       | 0,18 |
| Q9UHB9   | <a href="#">Signal recognition particle 68 kDa protein OS=Homo sapiens GN=SRP68 PE=1 SV=2 - [SRP68_HUMAN]</a>                      | 1,27       | 0,18 |
| Q96QE5   | <a href="#">Transcription elongation factor, mitochondrial OS=Homo sapiens GN=TEFM PE=1 SV=1 - [TEFM_HUMAN]</a>                    | 1,33       | 0,18 |
| Q96P16-3 | <a href="#">Isoform 3 of Regulation of nuclear pre-mRNA domain-containing protein 1A OS=Homo sapiens GN=RPRD1A - [RPR1A_HUMAN]</a> | 1,22       | 0,18 |
| Q8TCD1   | <a href="#">UPF0729 protein C18orf32 OS=Homo sapiens GN=C18orf32 PE=2 SV=1 - [CR032_HUMAN]</a>                                     | 1,54       | 0,18 |
| Q9NXC5-2 | <a href="#">Isoform 2 of WD repeat-containing protein mio OS=Homo sapiens GN=MIOS - [MIO_HUMAN]</a>                                | 1,23       | 0,18 |
| A2A2Y4-5 | <a href="#">Isoform 5 of FERM domain-containing protein 3 OS=Homo sapiens GN=FRMD3 - [FRMD3_HUMAN]</a>                             | 1,48       | 0,18 |
| Q8NFAQ   | <a href="#">Torsin-1A-interacting protein 2 OS=Homo sapiens GN=TOR1AIP2 PE=1 SV=1 - [TOIP2_HUMAN]</a>                              | 1,54       | 0,18 |
| Q15149-3 | <a href="#">Isoform 3 of Plectin OS=Homo sapiens GN=PLEC - [PLEC_HUMAN]</a>                                                        | 1,64       | 0,18 |
| Q5M9Q1   | <a href="#">NKAP-like protein OS=Homo sapiens GN=NKAPL PE=1 SV=3 - [NKAPL_HUMAN]</a>                                               | 1,38       | 0,18 |
| Q13232   | <a href="#">Nucleoside diphosphate kinase 3 OS=Homo sapiens GN=NME3 PE=1 SV=2 - [NDK3_HUMAN]</a>                                   | 1,44       | 0,18 |
| Q9H3H1-4 | <a href="#">Isoform 4 of tRNA dimethylallyltransferase, mitochondrial OS=Homo sapiens GN=TRIT1 - [MOD5_HUMAN]</a>                  | 1,24       | 0,18 |
| Q9BYD2   | <a href="#">39S ribosomal protein L9, mitochondrial OS=Homo sapiens GN=MRPL9 PE=1 SV=2 - [RM09_HUMAN]</a>                          | 1,41       | 0,18 |
| P04004   | <a href="#">Vitronectin OS=Homo sapiens GN=VTN PE=1 SV=1 - [VTNC_HUMAN]</a>                                                        | 1,77       | 0,18 |
| Q9H6V9   | <a href="#">UPF0554 protein C2orf43 OS=Homo sapiens GN=C2orf43 PE=1 SV=1 - [CB043_HUMAN]</a>                                       | 1,31       | 0,18 |
| Q92805   | <a href="#">Golgin subfamily A member 1 OS=Homo sapiens GN=GOLGA1 PE=1 SV=3 - [GOGA1_HUMAN]</a>                                    | 1,39       | 0,18 |
| P17813-2 | <a href="#">Isoform Short of Endoglin OS=Homo sapiens GN=ENG - [EGLN_HUMAN]</a>                                                    | 1,57       | 0,18 |
| Q6XZF7   | <a href="#">Dynamin-binding protein OS=Homo sapiens GN=DNMBP PE=1 SV=1 - [DNMBP_HUMAN]</a>                                         | 1,94       | 0,18 |
| Q6ZUT1-3 | <a href="#">Isoform 3 of Uncharacterized protein C11orf57 OS=Homo sapiens GN=C11orf57 - [CK057_HUMAN]</a>                          | 1,50       | 0,18 |
| Q86VU5   | <a href="#">Catechol O-methyltransferase domain-containing protein 1 OS=Homo sapiens GN=COMTD1 PE=1 SV=1 - [CMTD1_HUMAN]</a>       | 1,44       | 0,18 |
| Q6IAN0   | <a href="#">Dehydrogenase/reductase SDR family member 7B OS=Homo sapiens GN=DHRS7B PE=1 SV=2 - [DRS7B_HUMAN]</a>                   | 1,45       | 0,18 |
| Q8TCX5-2 | <a href="#">Isoform 2 of Rhophilin-1 OS=Homo sapiens GN=RHPN1 - [RHPN1_HUMAN]</a>                                                  | 1,43       | 0,18 |
| POC2W1   | <a href="#">F-box/SPRY domain-containing protein 1 OS=Homo sapiens GN=FBXO45 PE=1 SV=1 - [FBSP1_HUMAN]</a>                         | 1,38       | 0,18 |

## A375 vs. A375VR4

|           |                                                                                                                               |      |      |
|-----------|-------------------------------------------------------------------------------------------------------------------------------|------|------|
| Q96QD9    | <a href="#">UAP56-interacting factor OS=Homo sapiens GN=FYTTD1 PE=1 SV=3 - [UIF HUMAN]</a>                                    | 1,46 | 0,18 |
| Q92613    | <a href="#">Protein Jade-3 OS=Homo sapiens GN=PHF16 PE=1 SV=1 - [JADE3 HUMAN]</a>                                             | 1,43 | 0,18 |
| Q9HD45    | <a href="#">Transmembrane 9 superfamily member 3 OS=Homo sapiens GN=TM9SF3 PE=1 SV=2 - [TM9S3 HUMAN]</a>                      | 1,45 | 0,18 |
| Q9NVT9    | <a href="#">Armadillo repeat-containing protein 1 OS=Homo sapiens GN=ARMC1 PE=1 SV=1 - [ARMC1 HUMAN]</a>                      | 1,39 | 0,18 |
| Q86SQ9-3  | <a href="#">Isoform 3 of Dehydrodolichyl diphosphate synthase OS=Homo sapiens GN=DHDDS - [DHDDS HUMAN]</a>                    | 1,36 | 0,18 |
| Q9H9Q2-2  | <a href="#">Isoform 2 of COP9 signalosome complex subunit 7b OS=Homo sapiens GN=COPS7B - [CSN7B HUMAN]</a>                    | 1,51 | 0,18 |
| Q9UHQ9    | <a href="#">NADH-cytochrome b5 reductase 1 OS=Homo sapiens GN=CYB5R1 PE=1 SV=1 - [NB5R1 HUMAN]</a>                            | 1,49 | 0,18 |
| P84157-2  | <a href="#">Isoform 2 of Matrix-remodeling-associated protein 7 OS=Homo sapiens GN=MXRA7 - [MXRA7 HUMAN]</a>                  | 1,52 | 0,18 |
| Q969U6    | <a href="#">F-box/WD repeat-containing protein 5 OS=Homo sapiens GN=FBXW5 PE=1 SV=1 - [FBXW5 HUMAN]</a>                       | 1,81 | 0,18 |
| Q14980    | <a href="#">Nuclear mitotic apparatus protein 1 OS=Homo sapiens GN=NUMA1 PE=1 SV=2 - [NUMA1 HUMAN]</a>                        | 1,70 | 0,18 |
| O94826    | <a href="#">Mitochondrial import receptor subunit TOM70 OS=Homo sapiens GN=TOMM70A PE=1 SV=1 - [TOM70 HUMAN]</a>              | 1,49 | 0,18 |
| Q86SK9-2  | <a href="#">Isoform 2 of Stearoyl-CoA desaturase 5 OS=Homo sapiens GN=SCD5 - [SCD5 HUMAN]</a>                                 | 1,45 | 0,18 |
| P83369    | <a href="#">U7 snRNA-associated Sm-like protein LSm11 OS=Homo sapiens GN=LSM11 PE=1 SV=2 - [LSM11 HUMAN]</a>                  | 1,34 | 0,18 |
| Q9BSU3    | <a href="#">N-alpha-acetyltransferase 11 OS=Homo sapiens GN=NAA11 PE=1 SV=3 - [NAA11 HUMAN]</a>                               | 1,86 | 0,18 |
| Q9P0I2    | <a href="#">Transmembrane protein 111 OS=Homo sapiens GN=TMEM111 PE=1 SV=3 - [TM111 HUMAN]</a>                                | 1,48 | 0,18 |
| Q9BX59    | <a href="#">Tapasin-related protein OS=Homo sapiens GN=TAPBPL PE=1 SV=2 - [TPSNR HUMAN]</a>                                   | 1,38 | 0,18 |
| O14828    | <a href="#">Secretory carrier-associated membrane protein 3 OS=Homo sapiens GN=SCAMP3 PE=1 SV=3 - [SCAM3 HUMAN]</a>           | 1,29 | 0,18 |
| Q96D31    | <a href="#">Calcium release-activated calcium channel protein 1 OS=Homo sapiens GN=ORAI1 PE=1 SV=2 - [CRCM1 HUMAN]</a>        | 1,60 | 0,18 |
| Q16637-4  | <a href="#">Isoform SMN-delta57 of Survival motor neuron protein OS=Homo sapiens GN=SMN1 - [SMN HUMAN]</a>                    | 1,29 | 0,18 |
| Q96CB9-3  | <a href="#">Isoform 3 of Putative methyltransferase NSUN4 OS=Homo sapiens GN=NSUN4 - [NSUN4 HUMAN]</a>                        | 1,28 | 0,18 |
| Q8N4Q1    | <a href="#">Mitochondrial intermembrane space import and assembly protein 40 OS=Homo sapiens GN=CHCHD4 PE=1 SV=1 - [M</a>     | 1,54 | 0,18 |
| Q9NQE9    | <a href="#">Histidine triad nucleotide-binding protein 3 OS=Homo sapiens GN=HINT3 PE=1 SV=1 - [HINT3 HUMAN]</a>               | 1,35 | 0,18 |
| Q9NZW5    | <a href="#">MAGUK p55 subfamily member 6 OS=Homo sapiens GN=MPP6 PE=1 SV=2 - [MPP6 HUMAN]</a>                                 | 1,29 | 0,18 |
| P80303    | <a href="#">Nucleobindin-2 OS=Homo sapiens GN=NUCB2 PE=1 SV=2 - [NUCB2 HUMAN]</a>                                             | 1,37 | 0,18 |
| Q8N2Y8    | <a href="#">Iporin OS=Homo sapiens GN=RUSC2 PE=1 SV=3 - [RUSC2 HUMAN]</a>                                                     | 1,43 | 0,18 |
| Q03164-2  | <a href="#">Isoform 14P-18B of Histone-lysine N-methyltransferase MLL OS=Homo sapiens GN=MLL - [MLL1 HUMAN]</a>               | 1,38 | 0,18 |
| P81605    | <a href="#">Dermcidin OS=Homo sapiens GN=DCD PE=1 SV=2 - [DCD HUMAN]</a>                                                      | 1,43 | 0,18 |
| Q16394    | <a href="#">Exostosin-1 OS=Homo sapiens GN=EXT1 PE=1 SV=2 - [EXT1 HUMAN]</a>                                                  | 1,83 | 0,18 |
| Q03518    | <a href="#">Antigen peptide transporter 1 OS=Homo sapiens GN=TAP1 PE=1 SV=2 - [TAP1 HUMAN]</a>                                | 1,26 | 0,18 |
| Q6MZP7-4  | <a href="#">Isoform 4 of Protein lin-54 homolog OS=Homo sapiens GN=LIN54 - [LIN54 HUMAN]</a>                                  | 1,28 | 0,18 |
| O43824    | <a href="#">Putative GTP-binding protein 6 OS=Homo sapiens GN=GTPBP6 PE=2 SV=3 - [GTPBP6 HUMAN]</a>                           | 2,01 | 0,18 |
| Q13557-12 | <a href="#">Isoform Delta 12 of Calcium/calmodulin-dependent protein kinase type II subunit delta OS=Homo sapiens GN=CAMK</a> | 1,29 | 0,18 |
| Q9NW08    | <a href="#">DNA-directed RNA polymerase III subunit RPC2 OS=Homo sapiens GN=POLR3B PE=1 SV=2 - [RPC2 HUMAN]</a>               | 1,37 | 0,18 |

## A375 vs. A375VR4

|          |                                                                                                                                  |      |      |
|----------|----------------------------------------------------------------------------------------------------------------------------------|------|------|
| Q08379   | <a href="#">Golgin subfamily A member 2 OS=Homo sapiens GN=GOLGA2 PE=1 SV=3 - [GOGA2 HUMAN]</a>                                  | 1,42 | 0,18 |
| O14763-2 | <a href="#">Isoform Short of Tumor necrosis factor receptor superfamily member 10B OS=Homo sapiens GN=TNFRSF10B - [TR10]</a>     | 1,30 | 0,18 |
| P57105   | <a href="#">Synaptojanin-2-binding protein OS=Homo sapiens GN=SYNJ2BP PE=1 SV=2 - [SYJ2B HUMAN]</a>                              | 1,51 | 0,18 |
| Q14197   | <a href="#">Peptidyl-tRNA hydrolase ICT1, mitochondrial OS=Homo sapiens GN=ICT1 PE=1 SV=1 - [ICT1 HUMAN]</a>                     | 1,33 | 0,18 |
| Q8WVQ1-2 | <a href="#">Isoform 2 of Soluble calcium-activated nucleotidase 1 OS=Homo sapiens GN=CANT1 - [CANT1 HUMAN]</a>                   | 1,39 | 0,18 |
| P27105   | <a href="#">Erythrocyte band 7 integral membrane protein OS=Homo sapiens GN=STOM PE=1 SV=3 - [STOM HUMAN]</a>                    | 1,35 | 0,18 |
| Q8TC29   | <a href="#">Enkurin OS=Homo sapiens GN=ENKUR PE=2 SV=1 - [ENKUR HUMAN]</a>                                                       | 1,57 | 0,18 |
| Q9NS15   | <a href="#">Latent-transforming growth factor beta-binding protein 3 OS=Homo sapiens GN=LTBP3 PE=1 SV=4 - [LTBP3 HUMAN]</a>      | 1,35 | 0,18 |
| O14523   | <a href="#">C2 domain-containing protein 2-like OS=Homo sapiens GN=C2CD2L PE=1 SV=3 - [C2C2L HUMAN]</a>                          | 1,87 | 0,18 |
| Q96I20   | <a href="#">PRKC apoptosis WT1 regulator protein OS=Homo sapiens GN=PAWR PE=1 SV=1 - [PAWR HUMAN]</a>                            | 1,56 | 0,18 |
| Q70UQ0   | <a href="#">Inhibitor of nuclear factor kappa-B kinase-interacting protein OS=Homo sapiens GN=IKBIP PE=1 SV=1 - [IKIP HUMAN]</a> | 1,45 | 0,18 |
| Q6PCB8   | <a href="#">Embigin OS=Homo sapiens GN=EMB PE=1 SV=1 - [EMB HUMAN]</a>                                                           | 1,41 | 0,18 |
| Q9UII2-3 | <a href="#">Isoform 3 of ATPase inhibitor, mitochondrial OS=Homo sapiens GN=ATPIF1 - [ATIF1 HUMAN]</a>                           | 1,38 | 0,18 |
| Q9C005   | <a href="#">Protein dpy-30 homolog OS=Homo sapiens GN=DPY30 PE=1 SV=1 - [DPY30 HUMAN]</a>                                        | 1,35 | 0,18 |
| Q6UUV9-3 | <a href="#">Isoform 3 of CREB-regulated transcription coactivator 1 OS=Homo sapiens GN=CRTC1 - [CRTC1 HUMAN]</a>                 | 1,55 | 0,18 |
| P29279-2 | <a href="#">Isoform 2 of Connective tissue growth factor OS=Homo sapiens GN=CTGF - [CTGF HUMAN]</a>                              | 1,88 | 0,18 |
| Q13563   | <a href="#">Polycystin-2 OS=Homo sapiens GN=PKD2 PE=1 SV=3 - [PKD2 HUMAN]</a>                                                    | 1,51 | 0,18 |
| Q07812-5 | <a href="#">Isoform Epsilon of Apoptosis regulator BAX OS=Homo sapiens GN=BAX - [BAX HUMAN]</a>                                  | 1,40 | 0,18 |
| Q9H3K2   | <a href="#">Growth hormone-inducible transmembrane protein OS=Homo sapiens GN=GHITM PE=1 SV=2 - [GHITM HUMAN]</a>                | 1,56 | 0,18 |
| P35226   | <a href="#">Polycomb complex protein BMI-1 OS=Homo sapiens GN=BMI1 PE=1 SV=2 - [BMI1 HUMAN]</a>                                  | 1,36 | 0,41 |
| Q9BX10-2 | <a href="#">Isoform 2 of GTP-binding protein 2 OS=Homo sapiens GN=GTPBP2 - [GTPB2 HUMAN]</a>                                     | 1,41 | 0,41 |
| P61011   | <a href="#">Signal recognition particle 54 kDa protein OS=Homo sapiens GN=SRP54 PE=1 SV=1 - [SRP54 HUMAN]</a>                    | 1,25 | 0,41 |
| O14773   | <a href="#">Tripeptidyl-peptidase 1 OS=Homo sapiens GN=TPP1 PE=1 SV=2 - [TPP1 HUMAN]</a>                                         | 1,34 | 0,41 |
| O43766   | <a href="#">Lipoyl synthase, mitochondrial OS=Homo sapiens GN=LIAS PE=2 SV=3 - [LIAS HUMAN]</a>                                  | 1,40 | 0,41 |
| P11233   | <a href="#">Ras-related protein Ral-A OS=Homo sapiens GN=RALA PE=1 SV=1 - [RALA HUMAN]</a>                                       | 1,47 | 0,41 |
| Q8NBL1   | <a href="#">Protein O-glucosyltransferase 1 OS=Homo sapiens GN=POGLUT1 PE=1 SV=1 - [PGLT1 HUMAN]</a>                             | 1,29 | 0,41 |
| Q13488   | <a href="#">V-type proton ATPase 116 kDa subunit a isoform 3 OS=Homo sapiens GN=TCIRG1 PE=1 SV=3 - [VPP3 HUMAN]</a>              | 1,50 | 0,41 |
| Q53GQ0   | <a href="#">Estradiol 17-beta-dehydrogenase 12 OS=Homo sapiens GN=HSD17B12 PE=1 SV=2 - [DHB12 HUMAN]</a>                         | 1,50 | 0,41 |
| Q9H869-6 | <a href="#">Isoform 6 of YY1-associated protein 1 OS=Homo sapiens GN=YY1AP1 - [YYAP1 HUMAN]</a>                                  | 1,25 | 0,41 |
| Q9BVN2-2 | <a href="#">Isoform 2 of RUN and SH3 domain-containing protein 1 OS=Homo sapiens GN=RUSC1 - [RUSC1 HUMAN]</a>                    | 1,63 | 0,41 |
| P0C7T5   | <a href="#">Ataxin-1-like OS=Homo sapiens GN=ATXN1L PE=1 SV=1 - [ATX1L HUMAN]</a>                                                | 1,36 | 0,41 |
| O76094   | <a href="#">Signal recognition particle 72 kDa protein OS=Homo sapiens GN=SRP72 PE=1 SV=3 - [SRP72 HUMAN]</a>                    | 1,25 | 0,41 |
| P50416   | <a href="#">Carnitine O-palmitoyltransferase 1, liver isoform OS=Homo sapiens GN=CPT1A PE=1 SV=2 - [CPT1A HUMAN]</a>             | 1,47 | 0,41 |

## A375 vs. A375VR4

|          |                                                                                                                                      |      |      |
|----------|--------------------------------------------------------------------------------------------------------------------------------------|------|------|
| Q9Y6C9   | <a href="#">Mitochondrial carrier homolog 2 OS=Homo sapiens GN=MTCH2 PE=1 SV=1 - [MTCH2 HUMAN]</a>                                   | 1,36 | 0,41 |
| P09382   | <a href="#">Galectin-1 OS=Homo sapiens GN=LGALS1 PE=1 SV=2 - [LEG1 HUMAN]</a>                                                        | 1,49 | 0,41 |
| P99999   | <a href="#">Cytochrome c OS=Homo sapiens GN=CYCS PE=1 SV=2 - [CYC HUMAN]</a>                                                         | 1,31 | 0,41 |
| Q5JTD0-2 | <a href="#">Isoform 2 of Tight junction-associated protein 1 OS=Homo sapiens GN=TJAP1 - [TJAP1 HUMAN]</a>                            | 1,47 | 0,41 |
| Q6UWE0-3 | <a href="#">Isoform 3 of E3 ubiquitin-protein ligase LRSAM1 OS=Homo sapiens GN=LRSAM1 - [LRSAM1 HUMAN]</a>                           | 1,49 | 0,41 |
| P02533   | <a href="#">Keratin, type I cytoskeletal 14 OS=Homo sapiens GN=KRT14 PE=1 SV=4 - [K1C14 HUMAN]</a>                                   | 1,31 | 0,41 |
| Q14764   | <a href="#">Major vault protein OS=Homo sapiens GN=MVP PE=1 SV=4 - [MVP HUMAN]</a>                                                   | 2,40 | 0,41 |
| O60907-2 | <a href="#">Isoform 2 of F-box-like/WD repeat-containing protein TBL1X OS=Homo sapiens GN=TBL1X - [TBL1X HUMAN]</a>                  | 1,66 | 0,41 |
| O43920   | <a href="#">NADH dehydrogenase [ubiquinone] iron-sulfur protein 5 OS=Homo sapiens GN=NDUFS5 PE=1 SV=3 - [NDUS5 HUMA]</a>             | 1,45 | 0,41 |
| P51957-2 | <a href="#">Isoform 2 of Serine/threonine-protein kinase Nek4 OS=Homo sapiens GN=NEK4 - [NEK4 HUMAN]</a>                             | 1,82 | 0,41 |
| Q5BJD5-2 | <a href="#">Isoform 2 of Transmembrane protein 41B OS=Homo sapiens GN=TMEM41B - [TM41B HUMAN]</a>                                    | 1,50 | 0,41 |
| Q8NEZ5   | <a href="#">F-box only protein 22 OS=Homo sapiens GN=FBXO22 PE=1 SV=1 - [FBX22 HUMAN]</a>                                            | 2,63 | 0,41 |
| P08107   | <a href="#">Heat shock 70 kDa protein 1A/1B OS=Homo sapiens GN=HSPA1A PE=1 SV=5 - [HSP71 HUMAN]</a>                                  | 1,73 | 0,41 |
| Q13243   | <a href="#">Serine/arginine-rich splicing factor 5 OS=Homo sapiens GN=SRSF5 PE=1 SV=1 - [SRSF5 HUMAN]</a>                            | 1,24 | 0,41 |
| Q96HV5   | <a href="#">Transmembrane protein 41A OS=Homo sapiens GN=TMEM41A PE=2 SV=1 - [TM41A HUMAN]</a>                                       | 1,50 | 0,41 |
| Q6RI45-5 | <a href="#">Isoform 5 of Bromodomain and WD repeat-containing protein 3 OS=Homo sapiens GN=BRWD3 - [BRWD3 HUMAN]</a>                 | 1,25 | 0,41 |
| Q53TN4   | <a href="#">Cytochrome b reductase 1 OS=Homo sapiens GN=CYBRD1 PE=1 SV=1 - [CYBR1 HUMAN]</a>                                         | 1,36 | 0,41 |
| Q2PZ11-2 | <a href="#">Isoform 2 of Protein dpy-19 homolog 1 OS=Homo sapiens GN=DPY19L1 - [D19L1 HUMAN]</a>                                     | 1,47 | 0,41 |
| Q15070-2 | <a href="#">Isoform 2 of Mitochondrial inner membrane protein OXA1L OS=Homo sapiens GN=OXA1L - [OXA1L HUMAN]</a>                     | 1,38 | 0,41 |
| Q9UJV9   | <a href="#">Probable ATP-dependent RNA helicase DDX41 OS=Homo sapiens GN=DDX41 PE=1 SV=2 - [DDX41 HUMAN]</a>                         | 1,40 | 0,41 |
| O14979-3 | <a href="#">Isoform 3 of Heterogeneous nuclear ribonucleoprotein D-like OS=Homo sapiens GN=HNRPDL - [HNRDL HUMAN]</a>                | 1,42 | 0,41 |
| Q9P0J0   | <a href="#">NADH dehydrogenase [ubiquinone] 1 alpha subcomplex subunit 13 OS=Homo sapiens GN=NDUFA13 PE=1 SV=3 - [NDUFA13 HUMAN]</a> | 1,52 | 0,41 |
| Q96GC9   | <a href="#">Vacuole membrane protein 1 OS=Homo sapiens GN=VMP1 PE=1 SV=1 - [VMP1 HUMAN]</a>                                          | 1,42 | 0,41 |
| P07948-2 | <a href="#">Isoform 2 of Tyrosine-protein kinase Lyn OS=Homo sapiens GN=LYN - [LYN HUMAN]</a>                                        | 1,39 | 0,41 |
| Q7L0J3-2 | <a href="#">Isoform 2 of Synaptic vesicle glycoprotein 2A OS=Homo sapiens GN=SV2A - [SV2A HUMAN]</a>                                 | 1,30 | 0,41 |
| P20930   | <a href="#">Filaggrin OS=Homo sapiens GN=FLG PE=1 SV=3 - [FLG HUMAN]</a>                                                             | 1,34 | 0,41 |
| Q96C92-4 | <a href="#">Isoform 4 of Serologically defined colon cancer antigen 3 OS=Homo sapiens GN=SDCCAG3 - [SDCCAG3 HUMAN]</a>               | 1,41 | 0,41 |
| P78540   | <a href="#">Arginase-2, mitochondrial OS=Homo sapiens GN=ARG2 PE=1 SV=1 - [ARG2 HUMAN]</a>                                           | 2,03 | 0,41 |
| P19256-2 | <a href="#">Isoform 2 of Lymphocyte function-associated antigen 3 OS=Homo sapiens GN=CD58 - [LFA3 HUMAN]</a>                         | 1,31 | 0,41 |
| Q9NQY0-2 | <a href="#">Isoform 2 of Bridging integrator 3 OS=Homo sapiens GN=BIN3 - [BIN3 HUMAN]</a>                                            | 1,63 | 0,41 |
| Q9Y2M5   | <a href="#">Kelch-like protein 20 OS=Homo sapiens GN=KLHL20 PE=1 SV=4 - [KLHL20 HUMAN]</a>                                           | 1,23 | 0,41 |
| P33908   | <a href="#">Mannosyl-oligosaccharide 1,2-alpha-mannosidase IA OS=Homo sapiens GN=MAN1A1 PE=1 SV=3 - [MA1A1 HUMAN]</a>                | 1,64 | 0,41 |
| O00469-2 | <a href="#">Isoform 2 of Procollagen-lysine,2-oxoglutarate 5-dioxygenase 2 OS=Homo sapiens GN=PLOD2 - [PLOD2 HUMAN]</a>              | 1,48 | 0,41 |



## A375 vs. A375VR4

|                |                                                                                                                              |                    |                   |
|----------------|------------------------------------------------------------------------------------------------------------------------------|--------------------|-------------------|
| Q9P0L9-4       | <a href="#">Isoform 4 of Polycystic kidney disease 2-like 1 protein OS=Homo sapiens GN=PKD2L1 - [PK2L1_HUMAN]</a>            | 1,19               | 0,41              |
| Q92878         | <a href="#">DNA repair protein RAD50 OS=Homo sapiens GN=RAD50 PE=1 SV=1 - [RAD50_HUMAN]</a>                                  | 1,36               | 0,41              |
| Q3KR37-2       | <a href="#">Isoform 2 of GRAM domain-containing protein 1B OS=Homo sapiens GN=GRAMD1B - [GRM1B_HUMAN]</a>                    | 1,47               | 0,41              |
| Q7Z6M4         | <a href="#">mTERF domain-containing protein 2 OS=Homo sapiens GN=MTERFD2 PE=1 SV=3 - [MTER2_HUMAN]</a>                       | 1,31               | 0,41              |
| Q5VZF2-3       | <a href="#">Isoform 3 of Muscblind-like protein 2 OS=Homo sapiens GN=MBNL2 - [MBNL2_HUMAN]</a>                               | 1,38               | 0,41              |
| P25686-2       | <a href="#">Isoform 2 of DnaJ homolog subfamily B member 2 OS=Homo sapiens GN=DNAJB2 - [DNJB2_HUMAN]</a>                     | 1,22               | 0,41              |
| Q08722-2       | <a href="#">Isoform OA3-293 of Leukocyte surface antigen CD47 OS=Homo sapiens GN=CD47 - [CD47_HUMAN]</a>                     | 1,41               | 0,41              |
| P22307         | <a href="#">Non-specific lipid-transfer protein OS=Homo sapiens GN=SCP2 PE=1 SV=2 - [NLTP_HUMAN]</a>                         | 1,36               | 0,41              |
| Q8N9A8         | <a href="#">Transmembrane protein 188 OS=Homo sapiens GN=TMEM188 PE=2 SV=1 - [TM188_HUMAN]</a>                               | 1,44               | 0,41              |
| Q8ND76-2       | <a href="#">Isoform 2 of Cyclin-Y OS=Homo sapiens GN=CCNY - [CCNY_HUMAN]</a>                                                 | 1,41               | 0,41              |
| O75971-2       | <a href="#">Isoform 2 of snRNA-activating protein complex subunit 5 OS=Homo sapiens GN=SNAPC5 - [SNPC5_HUMAN]</a>            | 1,30               | 0,41              |
| P51116         | <a href="#">Fragile X mental retardation syndrome-related protein 2 OS=Homo sapiens GN=FXR2 PE=1 SV=2 - [FXR2_HUMAN]</a>     | 1,19               | 0,41              |
| P22692         | <a href="#">Insulin-like growth factor-binding protein 4 OS=Homo sapiens GN=IGFBP4 PE=1 SV=2 - [IBP4_HUMAN]</a>              | 1,50               | 0,41              |
| P15529-16      | <a href="#">Isoform 3 of Membrane cofactor protein OS=Homo sapiens GN=CD46 - [MCP_HUMAN]</a>                                 | 1,41               | 0,41              |
| P05091         | <a href="#">Aldehyde dehydrogenase, mitochondrial OS=Homo sapiens GN=ALDH2 PE=1 SV=2 - [ALDH2_HUMAN]</a>                     | 1,32               | 0,41              |
| P58335-4       | <a href="#">Isoform 4 of Anthrax toxin receptor 2 OS=Homo sapiens GN=ANTXR2 - [ANTR2_HUMAN]</a>                              | 1,36               | 0,41              |
| Q8IWY9-1       | <a href="#">Isoform 1 of Codanin-1 OS=Homo sapiens GN=CDAN1 - [CDAN1_HUMAN]</a>                                              | 1,48               | 0,41              |
| Q6ZUT3-2       | <a href="#">Isoform 2 of FERM domain-containing protein 7 OS=Homo sapiens GN=FRMD7 - [FRMD7_HUMAN]</a>                       | 1,20               | 0,41              |
| Q9UQR0         | <a href="#">Sex comb on midleg-like protein 2 OS=Homo sapiens GN=SCML2 PE=1 SV=1 - [SCML2_HUMAN]</a>                         | 1,27               | 0,41              |
| O95831-3       | <a href="#">Isoform 3 of Apoptosis-inducing factor 1, mitochondrial OS=Homo sapiens GN=AIFM1 - [AIFM1_HUMAN]</a>             | 1,43               | 0,41              |
| P49959         | <a href="#">Double-strand break repair protein MRE11A OS=Homo sapiens GN=MRE11A PE=1 SV=3 - [MRE11_HUMAN]</a>                | 1,26               | 0,41              |
| O15344-2       | <a href="#">Isoform 2 of Midline-1 OS=Homo sapiens GN=MID1 - [TRI18_HUMAN]</a>                                               | 1,54               | 0,41              |
| P53985         | <a href="#">Monocarboxylate transporter 1 OS=Homo sapiens GN=SLC16A1 PE=1 SV=3 - [MOT1_HUMAN]</a>                            | 1,44               | 0,41              |
| <b>Gene ID</b> | <b>Gene Name</b>                                                                                                             | <b>Fold Change</b> | <b>q-value(%)</b> |
| Q9UHT9         | <a href="#">Putative uncharacterized protein PRO1768 OS=Homo sapiens GN=PRO1768 PE=5 SV=1 - [YN005_HUMAN]</a>                | 0,51               | 0,00              |
| Q96RW7-2       | <a href="#">Isoform 2 of Hemicentin-1 OS=Homo sapiens GN=HMCN1 - [HMCN1_HUMAN]</a>                                           | 0,58               | 0,00              |
| P01011-2       | <a href="#">Isoform 2 of Alpha-1-antichymotrypsin OS=Homo sapiens GN=SERPINA3 - [AACT_HUMAN]</a>                             | 0,58               | 0,00              |
| Q9H4M7         | <a href="#">Pleckstrin homology domain-containing family A member 4 OS=Homo sapiens GN=PLEKHA4 PE=1 SV=2 - [PKHA4_HUMAN]</a> | 0,59               | 0,00              |
| Q9H5V8-2       | <a href="#">Isoform 2 of CUB domain-containing protein 1 OS=Homo sapiens GN=CDCP1 - [CDCP1_HUMAN]</a>                        | 0,62               | 0,00              |
| Q96MK3         | <a href="#">Protein FAM20A OS=Homo sapiens GN=FAM20A PE=1 SV=4 - [FA20A_HUMAN]</a>                                           | 0,52               | 0,00              |
| Q92626         | <a href="#">Peroxidasin homolog OS=Homo sapiens GN=PXDN PE=1 SV=2 - [PXDN_HUMAN]</a>                                         | 0,56               | 0,00              |
| Q7L311         | <a href="#">Armadillo repeat-containing X-linked protein 2 OS=Homo sapiens GN=ARMCX2 PE=2 SV=1 - [ARMX2_HUMAN]</a>           | 0,54               | 0,00              |
| P06858         | <a href="#">Lipoprotein lipase OS=Homo sapiens GN=LPL PE=1 SV=1 - [LIPL_HUMAN]</a>                                           | 0,47               | 0,00              |

## A375 vs. A375VR4

|          |                                                                                                                                    |      |      |
|----------|------------------------------------------------------------------------------------------------------------------------------------|------|------|
| P98196   | <a href="#">Probable phospholipid-transporting ATPase 1H OS=Homo sapiens GN=ATP11A PE=2 SV=3 - [AT11A HUMAN]</a>                   | 0,58 | 0,00 |
| P14384   | <a href="#">Carboxypeptidase M OS=Homo sapiens GN=CPM PE=1 SV=2 - [CBPM HUMAN]</a>                                                 | 0,55 | 0,00 |
| P15907   | <a href="#">Beta-galactoside alpha-2,6-sialyltransferase 1 OS=Homo sapiens GN=ST6GAL1 PE=1 SV=1 - [SIAT1 HUMAN]</a>                | 0,60 | 0,00 |
| P09493-6 | <a href="#">Isoform 6 of Tropomyosin alpha-1 chain OS=Homo sapiens GN=TPM1 - [TPM1 HUMAN]</a>                                      | 0,64 | 0,00 |
| P46013-2 | <a href="#">Isoform Short of Antigen KI-67 OS=Homo sapiens GN=MKI67 - [KI67 HUMAN]</a>                                             | 0,62 | 0,00 |
| Q8WY21-3 | <a href="#">Isoform 3 of VPS10 domain-containing receptor SorCS1 OS=Homo sapiens GN=SORCS1 - [SORC1 HUMAN]</a>                     | 0,56 | 0,00 |
| P49448   | <a href="#">Glutamate dehydrogenase 2, mitochondrial OS=Homo sapiens GN=GLUD2 PE=1 SV=2 - [DHE4 HUMAN]</a>                         | 0,63 | 0,00 |
| Q9H568   | <a href="#">Actin-like protein 8 OS=Homo sapiens GN=ACTL8 PE=2 SV=1 - [ACTL8 HUMAN]</a>                                            | 0,61 | 0,00 |
| Q96HQ2   | <a href="#">CDKN2AIP N-terminal-like protein OS=Homo sapiens GN=CDKN2AIPNL PE=1 SV=1 - [C2AIL HUMAN]</a>                           | 0,61 | 0,00 |
| O96020   | <a href="#">G1/S-specific cyclin-E2 OS=Homo sapiens GN=CCNE2 PE=1 SV=1 - [CCNE2 HUMAN]</a>                                         | 0,66 | 0,00 |
| P09471-2 | <a href="#">Isoform Alpha-2 of Guanine nucleotide-binding protein G(o) subunit alpha OS=Homo sapiens GN=GNAO1 - [GNAO1 HUMAN]</a>  | 0,59 | 0,00 |
| P16112-3 | <a href="#">Isoform 3 of Aggrecan core protein OS=Homo sapiens GN=ACAN - [PGCA HUMAN]</a>                                          | 0,57 | 0,00 |
| Q6ZNJ1-4 | <a href="#">Isoform 4 of Neurobeachin-like protein 2 OS=Homo sapiens GN=NBEAL2 - [NBEL2 HUMAN]</a>                                 | 0,66 | 0,00 |
| P24557   | <a href="#">Thromboxane-A synthase OS=Homo sapiens GN=TBXAS1 PE=1 SV=3 - [THAS HUMAN]</a>                                          | 0,55 | 0,00 |
| Q8NI37   | <a href="#">Protein phosphatase PTC7 homolog OS=Homo sapiens GN=PPTC7 PE=2 SV=1 - [PPTC7 HUMAN]</a>                                | 0,66 | 0,00 |
| Q96JQ2   | <a href="#">Calmin OS=Homo sapiens GN=CLMN PE=1 SV=1 - [CLMN HUMAN]</a>                                                            | 0,59 | 0,00 |
| Q16610   | <a href="#">Extracellular matrix protein 1 OS=Homo sapiens GN=ECM1 PE=1 SV=2 - [ECM1 HUMAN]</a>                                    | 0,64 | 0,00 |
| P48681   | <a href="#">Nestin OS=Homo sapiens GN=NES PE=1 SV=2 - [NEST HUMAN]</a>                                                             | 0,58 | 0,00 |
| Q05655   | <a href="#">Protein kinase C delta type OS=Homo sapiens GN=PRKCD PE=1 SV=2 - [KPCD HUMAN]</a>                                      | 0,69 | 0,00 |
| P18065   | <a href="#">Insulin-like growth factor-binding protein 2 OS=Homo sapiens GN=IGFBP2 PE=1 SV=2 - [IBP2 HUMAN]</a>                    | 0,56 | 0,00 |
| Q9Y4Y9-2 | <a href="#">Isoform 2 of U6 snRNA-associated Sm-like protein LSm5 OS=Homo sapiens GN=LSM5 - [LSM5 HUMAN]</a>                       | 0,69 | 0,00 |
| P20336   | <a href="#">Ras-related protein Rab-3A OS=Homo sapiens GN=RAB3A PE=1 SV=1 - [RAB3A HUMAN]</a>                                      | 0,64 | 0,00 |
| Q6EEV4-2 | <a href="#">Isoform 5 of DNA-directed RNA polymerase II subunit GRINL1A, isoforms 4/5 OS=Homo sapiens GN=POLR2M - [GL1A HUMAN]</a> | 0,52 | 0,00 |
| Q5VVJ2-2 | <a href="#">Isoform 2 of Histone H2A deubiquitinase MYSM1 OS=Homo sapiens GN=MYSM1 - [MYSM1 HUMAN]</a>                             | 0,69 | 0,00 |
| Q9ULX9   | <a href="#">Transcription factor MafF OS=Homo sapiens GN=MAFF PE=1 SV=2 - [MAFF HUMAN]</a>                                         | 0,61 | 0,00 |
| Q9Y3B1   | <a href="#">Protein slowmo homolog 2 OS=Homo sapiens GN=SLMO2 PE=1 SV=2 - [SLMO2 HUMAN]</a>                                        | 0,67 | 0,00 |
| P20265-3 | <a href="#">Isoform N-OCT 5B of POU domain, class 3, transcription factor 2 OS=Homo sapiens GN=POU3F2 - [PO3F2 HUMAN]</a>          | 0,57 | 0,00 |
| Q86T65   | <a href="#">Disheveled-associated activator of morphogenesis 2 OS=Homo sapiens GN=DAAM2 PE=2 SV=3 - [DAAM2 HUMAN]</a>              | 0,59 | 0,00 |
| O75600   | <a href="#">2-amino-3-ketobutyrate coenzyme A ligase, mitochondrial OS=Homo sapiens GN=GCAT PE=2 SV=1 - [KBL HUMAN]</a>            | 0,63 | 0,00 |
| Q8IVL5   | <a href="#">Prolyl 3-hydroxylase 2 OS=Homo sapiens GN=LEPREL1 PE=1 SV=1 - [P3H2 HUMAN]</a>                                         | 0,65 | 0,00 |
| O43293   | <a href="#">Death-associated protein kinase 3 OS=Homo sapiens GN=DAPK3 PE=1 SV=1 - [DAPK3 HUMAN]</a>                               | 0,61 | 0,00 |
| Q9P2F8   | <a href="#">Signal-induced proliferation-associated 1-like protein 2 OS=Homo sapiens GN=SIPA1L2 PE=1 SV=2 - [SI1L2 HUMAN]</a>      | 0,69 | 0,00 |
| Q8NFZ8   | <a href="#">Cell adhesion molecule 4 OS=Homo sapiens GN=CADM4 PE=1 SV=1 - [CADM4 HUMAN]</a>                                        | 0,67 | 0,00 |

## A375 vs. A375VR4

|          |                                                                                                                               |      |      |
|----------|-------------------------------------------------------------------------------------------------------------------------------|------|------|
| Q1L5Z9   | <a href="#">LON peptidase N-terminal domain and RING finger protein 2 OS=Homo sapiens GN=LONRF2 PE=2 SV=3 - [LONF2_HUMAN]</a> | 0,55 | 0,00 |
| Q9BUE6   | <a href="#">Iron-sulfur cluster assembly 1 homolog, mitochondrial OS=Homo sapiens GN=ISCA1 PE=2 SV=1 - [ISCA1_HUMAN]</a>      | 0,74 | 0,00 |
| O00291   | <a href="#">Huntingtin-interacting protein 1 OS=Homo sapiens GN=HIP1 PE=1 SV=5 - [HIP1_HUMAN]</a>                             | 0,72 | 0,00 |
| Q08174-2 | <a href="#">Isoform 2 of Protocadherin-1 OS=Homo sapiens GN=PCDH1 - [PCDH1_HUMAN]</a>                                         | 0,64 | 0,00 |
| Q9H246   | <a href="#">Uncharacterized protein C1orf21 OS=Homo sapiens GN=C1orf21 PE=1 SV=1 - [CA021_HUMAN]</a>                          | 0,70 | 0,00 |
| Q96AH8   | <a href="#">Ras-related protein Rab-7b OS=Homo sapiens GN=RAB7B PE=2 SV=1 - [RAB7B_HUMAN]</a>                                 | 0,58 | 0,00 |
| O95425   | <a href="#">Supervillin OS=Homo sapiens GN=SVIL PE=1 SV=2 - [SVIL_HUMAN]</a>                                                  | 0,71 | 0,00 |
| Q14993   | <a href="#">Collagen alpha-1(XIX) chain OS=Homo sapiens GN=COL19A1 PE=1 SV=3 - [COJA1_HUMAN]</a>                              | 0,63 | 0,00 |
| P08294   | <a href="#">Extracellular superoxide dismutase [Cu-Zn] OS=Homo sapiens GN=SOD3 PE=1 SV=2 - [SODE_HUMAN]</a>                   | 0,60 | 0,00 |
| Q96M89   | <a href="#">Coiled-coil domain-containing protein 138 OS=Homo sapiens GN=CCDC138 PE=1 SV=1 - [CC138_HUMAN]</a>                | 0,73 | 0,00 |
| A4D1P6-2 | <a href="#">Isoform 2 of WD repeat-containing protein 91 OS=Homo sapiens GN=WDR91 - [WDR91_HUMAN]</a>                         | 0,67 | 0,00 |
| O00712   | <a href="#">Nuclear factor 1 B-type OS=Homo sapiens GN=NFIB PE=1 SV=2 - [NFIB_HUMAN]</a>                                      | 0,68 | 0,00 |
| O94925   | <a href="#">Glutaminase kidney isoform, mitochondrial OS=Homo sapiens GN=GLSK PE=1 SV=1 - [GLSK_HUMAN]</a>                    | 0,70 | 0,00 |
| Q9HA77   | <a href="#">Probable cysteine--tRNA ligase, mitochondrial OS=Homo sapiens GN=CARS2 PE=1 SV=1 - [SYCM_HUMAN]</a>               | 0,68 | 0,00 |
| Q86XN7   | <a href="#">Proline and serine-rich protein 1 OS=Homo sapiens GN=PROSER1 PE=1 SV=2 - [PRSR1_HUMAN]</a>                        | 0,73 | 0,00 |
| Q14699   | <a href="#">Raftlin OS=Homo sapiens GN=RFTN1 PE=1 SV=4 - [RFTN1_HUMAN]</a>                                                    | 0,69 | 0,00 |
| O94832   | <a href="#">Myosin-Id OS=Homo sapiens GN=MYO1D PE=1 SV=2 - [MYO1D_HUMAN]</a>                                                  | 0,66 | 0,00 |
| Q9NS69   | <a href="#">Mitochondrial import receptor subunit TOM22 homolog OS=Homo sapiens GN=TOMM22 PE=1 SV=3 - [TOM22_HUMAN]</a>       | 0,55 | 0,00 |
| P78395   | <a href="#">Melanoma antigen preferentially expressed in tumors OS=Homo sapiens GN=PRAME PE=1 SV=1 - [PRAME_HUMAN]</a>        | 0,70 | 0,00 |
| Q8TDW5   | <a href="#">Synaptotagmin-like protein 5 OS=Homo sapiens GN=SYTL5 PE=1 SV=1 - [SYTL5_HUMAN]</a>                               | 0,74 | 0,00 |
| Q14644   | <a href="#">Ras GTPase-activating protein 3 OS=Homo sapiens GN=RASA3 PE=1 SV=3 - [RASA3_HUMAN]</a>                            | 0,67 | 0,00 |
| Q9UL26   | <a href="#">Ras-related protein Rab-22A OS=Homo sapiens GN=RAB22A PE=1 SV=2 - [RB22A_HUMAN]</a>                               | 0,73 | 0,00 |
| Q6IC98   | <a href="#">GRAM domain-containing protein 4 OS=Homo sapiens GN=GRAMD4 PE=1 SV=1 - [GRAM4_HUMAN]</a>                          | 0,70 | 0,00 |
| Q7Z699   | <a href="#">Sprouty-related, EVH1 domain-containing protein 1 OS=Homo sapiens GN=SPRED1 PE=1 SV=2 - [SPRE1_HUMAN]</a>         | 0,71 | 0,00 |
| Q6PCB6   | <a href="#">Abhydrolase domain-containing protein FAM108C1 OS=Homo sapiens GN=FAM108C1 PE=2 SV=2 - [F108C_HUMAN]</a>          | 0,71 | 0,00 |
| Q9Y5Z0-3 | <a href="#">Isoform 3 of Beta-secretase 2 OS=Homo sapiens GN=BACE2 - [BACE2_HUMAN]</a>                                        | 0,67 | 0,00 |
| Q9NPH3   | <a href="#">Interleukin-1 receptor accessory protein OS=Homo sapiens GN=IL1RAP PE=1 SV=2 - [IL1AP_HUMAN]</a>                  | 0,66 | 0,00 |
| P48735   | <a href="#">Isocitrate dehydrogenase [NADP], mitochondrial OS=Homo sapiens GN=IDH2 PE=1 SV=2 - [IDHP_HUMAN]</a>               | 0,65 | 0,00 |
| P22681   | <a href="#">E3 ubiquitin-protein ligase CBL OS=Homo sapiens GN=CBL PE=1 SV=2 - [CBL_HUMAN]</a>                                | 0,72 | 0,00 |
| Q5THK1-4 | <a href="#">Isoform 4 of Protein PRR14L OS=Homo sapiens GN=PRR14L - [PR14L_HUMAN]</a>                                         | 0,74 | 0,00 |
| P05106-2 | <a href="#">Isoform Beta-3B of Integrin beta-3 OS=Homo sapiens GN=ITGB3 - [ITB3_HUMAN]</a>                                    | 0,67 | 0,00 |
| P01023   | <a href="#">Alpha-2-macroglobulin OS=Homo sapiens GN=A2M PE=1 SV=3 - [A2MG_HUMAN]</a>                                         | 0,66 | 0,00 |
| Q13813-3 | <a href="#">Isoform 3 of Spectrin alpha chain, brain OS=Homo sapiens GN=SPTAN1 - [SPTA2_HUMAN]</a>                            | 0,71 | 0,00 |

## A375 vs. A375VR4

|          |                                                                                                                           |      |      |
|----------|---------------------------------------------------------------------------------------------------------------------------|------|------|
| Q96CG8   | <a href="#">Collagen triple helix repeat-containing protein 1 OS=Homo sapiens GN=CTHRC1 PE=1 SV=1 - [CTHR1 HUMAN]</a>     | 0,67 | 0,00 |
| Q9BXJ8-2 | <a href="#">Isoform 2 of Transmembrane protein 120A OS=Homo sapiens GN=TMEM120A - [T120A HUMAN]</a>                       | 0,71 | 0,00 |
| P49006   | <a href="#">MARCKS-related protein OS=Homo sapiens GN=MARCKSL1 PE=1 SV=2 - [MRP HUMAN]</a>                                | 0,74 | 0,00 |
| P09601   | <a href="#">Heme oxygenase 1 OS=Homo sapiens GN=HMOX1 PE=1 SV=1 - [HMOX1 HUMAN]</a>                                       | 0,65 | 0,00 |
| Q05682-3 | <a href="#">Isoform 3 of Caldesmon OS=Homo sapiens GN=CALD1 - [CALD1 HUMAN]</a>                                           | 0,75 | 0,00 |
| A6NFQ2-3 | <a href="#">Isoform 3 of Protein FAM115C OS=Homo sapiens GN=FAM115C - [F115C HUMAN]</a>                                   | 0,73 | 0,00 |
| Q13469-2 | <a href="#">Isoform B of Nuclear factor of activated T-cells, cytoplasmic 2 OS=Homo sapiens GN=NFATC2 - [NFAC2 HUMAN]</a> | 0,64 | 0,00 |
| Q8TE99-2 | <a href="#">Isoform 2 of Acid phosphatase-like protein 2 OS=Homo sapiens GN=ACPL2 - [ACPL2 HUMAN]</a>                     | 0,62 | 0,00 |
| Q08431-3 | <a href="#">Isoform 3 of Lactadherin OS=Homo sapiens GN=MFG8 - [MFGM HUMAN]</a>                                           | 0,66 | 0,00 |
| Q8IUW5   | <a href="#">RELT-like protein 1 OS=Homo sapiens GN=RELL1 PE=1 SV=1 - [RELL1 HUMAN]</a>                                    | 0,74 | 0,00 |
| P58215   | <a href="#">Lysyl oxidase homolog 3 OS=Homo sapiens GN=LOXL3 PE=2 SV=1 - [LOXL3 HUMAN]</a>                                | 0,67 | 0,00 |
| Q10588   | <a href="#">ADP-ribosyl cyclase 2 OS=Homo sapiens GN=BST1 PE=1 SV=2 - [BST1 HUMAN]</a>                                    | 0,63 | 0,00 |
| O75461   | <a href="#">Transcription factor E2F6 OS=Homo sapiens GN=E2F6 PE=1 SV=1 - [E2F6 HUMAN]</a>                                | 0,67 | 0,00 |
| O75190-3 | <a href="#">Isoform C of DnaJ homolog subfamily B member 6 OS=Homo sapiens GN=DNAJB6 - [DNJB6 HUMAN]</a>                  | 0,75 | 0,00 |
| O00462   | <a href="#">Beta-mannosidase OS=Homo sapiens GN=MANBA PE=1 SV=3 - [MANBA HUMAN]</a>                                       | 0,74 | 0,00 |
| Q8WXH0   | <a href="#">Nesprin-2 OS=Homo sapiens GN=SYNE2 PE=1 SV=3 - [SYNE2 HUMAN]</a>                                              | 0,68 | 0,00 |
| O94921-3 | <a href="#">Isoform 3 of Cyclin-dependent kinase 14 OS=Homo sapiens GN=CDK14 - [CDK14 HUMAN]</a>                          | 0,71 | 0,00 |
| Q96P11   | <a href="#">Putative methyltransferase NSUN5 OS=Homo sapiens GN=NSUN5 PE=1 SV=2 - [NSUN5 HUMAN]</a>                       | 0,73 | 0,00 |
| Q9Y6Y0   | <a href="#">Influenza virus NS1A-binding protein OS=Homo sapiens GN=IVNS1ABP PE=1 SV=3 - [NS1BP HUMAN]</a>                | 0,72 | 0,00 |
| Q3KRA6   | <a href="#">UPF0538 protein C2orf76 OS=Homo sapiens GN=C2orf76 PE=2 SV=3 - [CB076 HUMAN]</a>                              | 0,67 | 0,00 |
| Q9Y3Q8   | <a href="#">TSC22 domain family protein 4 OS=Homo sapiens GN=TSC22D4 PE=1 SV=2 - [T22D4 HUMAN]</a>                        | 0,68 | 0,00 |
| Q04726-2 | <a href="#">Isoform 2 of Transducin-like enhancer protein 3 OS=Homo sapiens GN=TLE3 - [TLE3 HUMAN]</a>                    | 0,72 | 0,00 |
| Q14331   | <a href="#">Protein FRG1 OS=Homo sapiens GN=FRG1 PE=1 SV=1 - [FRG1 HUMAN]</a>                                             | 0,79 | 0,00 |
| Q96P53   | <a href="#">WD repeat and FYVE domain-containing protein 2 OS=Homo sapiens GN=WDFY2 PE=2 SV=2 - [WDFY2 HUMAN]</a>         | 0,67 | 0,00 |
| O95084   | <a href="#">Serine protease 23 OS=Homo sapiens GN=PRSS23 PE=1 SV=1 - [PRS23 HUMAN]</a>                                    | 0,76 | 0,00 |
| Q8IWJ2   | <a href="#">GRIP and coiled-coil domain-containing protein 2 OS=Homo sapiens GN=GCC2 PE=1 SV=4 - [GCC2 HUMAN]</a>         | 0,78 | 0,00 |
| Q9NZV5-2 | <a href="#">Isoform 2 of Selenoprotein N OS=Homo sapiens GN=SEPN1 - [SELN HUMAN]</a>                                      | 0,67 | 0,00 |
| Q9H4W6-2 | <a href="#">Isoform Short of Transcription factor COE3 OS=Homo sapiens GN=EBF3 - [COE3 HUMAN]</a>                         | 0,71 | 0,00 |
| Q14956-2 | <a href="#">Isoform 2 of Transmembrane glycoprotein NMB OS=Homo sapiens GN=GPNMB - [GPNMB HUMAN]</a>                      | 0,64 | 0,00 |
| Q7Z4L5   | <a href="#">Tetratricopeptide repeat protein 21B OS=Homo sapiens GN=TTC21B PE=1 SV=2 - [TT21B HUMAN]</a>                  | 0,54 | 0,00 |
| Q9BR77   | <a href="#">Coiled-coil domain-containing protein 77 OS=Homo sapiens GN=CCDC77 PE=2 SV=1 - [CCD77 HUMAN]</a>              | 0,80 | 0,00 |
| P09543-2 | <a href="#">Isoform CNPI of 2',3'-cyclic-nucleotide 3'-phosphodiesterase OS=Homo sapiens GN=CNP - [CN37 HUMAN]</a>        | 0,73 | 0,00 |
| Q9Y2D0   | <a href="#">Carbonic anhydrase 5B, mitochondrial OS=Homo sapiens GN=CA5B PE=1 SV=1 - [CAH5B HUMAN]</a>                    | 0,70 | 0,00 |

## A375 vs. A375VR4

|          |                                                                                                                                 |      |      |
|----------|---------------------------------------------------------------------------------------------------------------------------------|------|------|
| Q8TBP6   | <a href="#">Solute carrier family 25 member 40 OS=Homo sapiens GN=SLC25A40 PE=2 SV=1 - [S2540 HUMAN]</a>                        | 0,71 | 0,00 |
| Q99797   | <a href="#">Mitochondrial intermediate peptidase OS=Homo sapiens GN=MIPEP PE=1 SV=2 - [MIPEP HUMAN]</a>                         | 0,69 | 0,00 |
| Q9Y666   | <a href="#">Solute carrier family 12 member 7 OS=Homo sapiens GN=SLC12A7 PE=1 SV=3 - [S12A7 HUMAN]</a>                          | 0,74 | 0,00 |
| Q16880   | <a href="#">2-hydroxyacylsphingosine 1-beta-galactosyltransferase OS=Homo sapiens GN=UGT8 PE=2 SV=2 - [CGT HUMAN]</a>           | 0,67 | 0,00 |
| P43005   | <a href="#">Excitatory amino acid transporter 3 OS=Homo sapiens GN=SLC1A1 PE=1 SV=2 - [EAA3 HUMAN]</a>                          | 0,69 | 0,00 |
| Q9BWF2   | <a href="#">TRAF-interacting protein OS=Homo sapiens GN=TRAIP PE=1 SV=1 - [TRAIP HUMAN]</a>                                     | 0,77 | 0,00 |
| Q9BXW7-2 | <a href="#">Isoform 1 of Cat eye syndrome critical region protein 5 OS=Homo sapiens GN=CECR5 - [CECR5 HUMAN]</a>                | 0,71 | 0,00 |
| Q9UPN4-2 | <a href="#">Isoform 2 of 5-azacytidine-induced protein 1 OS=Homo sapiens GN=AZI1 - [AZI1 HUMAN]</a>                             | 0,74 | 0,00 |
| Q13315   | <a href="#">Serine-protein kinase ATM OS=Homo sapiens GN=ATM PE=1 SV=3 - [ATM HUMAN]</a>                                        | 0,80 | 0,00 |
| Q6P2I3   | <a href="#">Fumarylacetoacetate hydrolase domain-containing protein 2B OS=Homo sapiens GN=FAHD2B PE=1 SV=1 - [FAH2B HUMAN]</a>  | 0,68 | 0,00 |
| Q92831   | <a href="#">Histone acetyltransferase KAT2B OS=Homo sapiens GN=KAT2B PE=1 SV=3 - [KAT2B HUMAN]</a>                              | 0,68 | 0,00 |
| P25325   | <a href="#">3-mercaptopyruvate sulfurtransferase OS=Homo sapiens GN=MPST PE=1 SV=3 - [THTM HUMAN]</a>                           | 0,76 | 0,00 |
| Q96GE4   | <a href="#">Centrosomal protein of 95 kDa OS=Homo sapiens GN=CEP95 PE=1 SV=1 - [CEP95 HUMAN]</a>                                | 0,73 | 0,00 |
| Q06330-3 | <a href="#">Isoform APCR-3 of Recombining binding protein suppressor of hairless OS=Homo sapiens GN=RBPJ - [SUH HUMAN]</a>      | 0,80 | 0,00 |
| P13667   | <a href="#">Protein disulfide-isomerase A4 OS=Homo sapiens GN=PDIA4 PE=1 SV=2 - [PDIA4 HUMAN]</a>                               | 0,74 | 0,00 |
| Q08117   | <a href="#">Amino-terminal enhancer of split OS=Homo sapiens GN=AES PE=1 SV=4 - [AES HUMAN]</a>                                 | 0,76 | 0,00 |
| Q969R8   | <a href="#">Integrin-alpha FG-GAP repeat-containing protein 2 OS=Homo sapiens GN=ITFG2 PE=2 SV=1 - [ITFG2 HUMAN]</a>            | 0,74 | 0,00 |
| Q8NBN7-2 | <a href="#">Isoform 2 of Retinol dehydrogenase 13 OS=Homo sapiens GN=RDH13 - [RDH13 HUMAN]</a>                                  | 0,66 | 0,00 |
| P80404   | <a href="#">4-aminobutyrate aminotransferase, mitochondrial OS=Homo sapiens GN=ABAT PE=1 SV=3 - [GABT HUMAN]</a>                | 0,68 | 0,00 |
| P50851-2 | <a href="#">Isoform 2 of Lipopolysaccharide-responsive and beige-like anchor protein OS=Homo sapiens GN=LRBA - [LRBA HUMAN]</a> | 0,55 | 0,00 |
| Q9UKG9   | <a href="#">Peroxisomal carnitine O-octanoyltransferase OS=Homo sapiens GN=CROT PE=1 SV=2 - [OCTC HUMAN]</a>                    | 0,77 | 0,00 |
| Q86VN1-2 | <a href="#">Isoform 2 of Vacuolar protein-sorting-associated protein 36 OS=Homo sapiens GN=VPS36 - [VPS36 HUMAN]</a>            | 0,73 | 0,00 |
| Q8NDD1-3 | <a href="#">Isoform 3 of Uncharacterized protein C1orf131 OS=Homo sapiens GN=C1orf131 - [CA131 HUMAN]</a>                       | 0,74 | 0,00 |
| Q9UBU7   | <a href="#">Protein DBF4 homolog A OS=Homo sapiens GN=DBF4 PE=1 SV=1 - [DBF4A HUMAN]</a>                                        | 0,70 | 0,00 |
| Q9Y4H2   | <a href="#">Insulin receptor substrate 2 OS=Homo sapiens GN=IRS2 PE=1 SV=2 - [IRS2 HUMAN]</a>                                   | 0,80 | 0,00 |
| P56693   | <a href="#">Transcription factor SOX-10 OS=Homo sapiens GN=SOX10 PE=1 SV=1 - [SOX10 HUMAN]</a>                                  | 0,66 | 0,00 |
| Q06481-4 | <a href="#">Isoform 4 of Amyloid-like protein 2 OS=Homo sapiens GN=APLP2 - [APLP2 HUMAN]</a>                                    | 0,71 | 0,00 |
| P57729   | <a href="#">Ras-related protein Rab-38 OS=Homo sapiens GN=RAB38 PE=1 SV=1 - [RAB38 HUMAN]</a>                                   | 0,73 | 0,00 |
| Q8N4X5-2 | <a href="#">Isoform 2 of Actin filament-associated protein 1-like 2 OS=Homo sapiens GN=AFAP1L2 - [AF1L2 HUMAN]</a>              | 0,69 | 0,14 |
| P56282   | <a href="#">DNA polymerase epsilon subunit 2 OS=Homo sapiens GN=POLE2 PE=1 SV=2 - [DPOE2 HUMAN]</a>                             | 0,76 | 0,14 |
| Q92520   | <a href="#">Protein FAM3C OS=Homo sapiens GN=FAM3C PE=1 SV=1 - [FAM3C HUMAN]</a>                                                | 0,75 | 0,14 |
| Q96IR7   | <a href="#">4-hydroxyphenylpyruvate dioxygenase-like protein OS=Homo sapiens GN=HPDL PE=1 SV=1 - [HPDL HUMAN]</a>               | 0,66 | 0,14 |
| Q92754   | <a href="#">Transcription factor AP-2 gamma OS=Homo sapiens GN=TFAP2C PE=1 SV=1 - [AP2C HUMAN]</a>                              | 0,70 | 0,14 |

## A375 vs. A375VR4

|          |                                                                                                                               |      |      |
|----------|-------------------------------------------------------------------------------------------------------------------------------|------|------|
| Q06033-2 | <a href="#">Isoform 2 of Inter-alpha-trypsin inhibitor heavy chain H3 OS=Homo sapiens GN=ITIH3 - [ITIH3_HUMAN]</a>            | 0,75 | 0,14 |
| P13612   | <a href="#">Integrin alpha-4 OS=Homo sapiens GN=ITGA4 PE=1 SV=3 - [ITA4_HUMAN]</a>                                            | 0,73 | 0,14 |
| O75444   | <a href="#">Transcription factor Maf OS=Homo sapiens GN=MAF PE=1 SV=2 - [MAF_HUMAN]</a>                                       | 0,67 | 0,14 |
| Q9Y6N5   | <a href="#">Sulfide:quinone oxidoreductase, mitochondrial OS=Homo sapiens GN=SQRDL PE=1 SV=1 - [SQRD_HUMAN]</a>               | 0,70 | 0,14 |
| A6NHX0   | <a href="#">GATS-like protein 2 OS=Homo sapiens GN=GATSL2 PE=2 SV=3 - [GATL2_HUMAN]</a>                                       | 0,73 | 0,14 |
| Q9UGP4   | <a href="#">LIM domain-containing protein 1 OS=Homo sapiens GN=LIMD1 PE=1 SV=1 - [LIMD1_HUMAN]</a>                            | 0,63 | 0,14 |
| Q8NHP6   | <a href="#">Motile sperm domain-containing protein 2 OS=Homo sapiens GN=MOSPD2 PE=1 SV=1 - [MSPD2_HUMAN]</a>                  | 0,73 | 0,14 |
| Q9H7C4-2 | <a href="#">Isoform 2 of Syncoilin OS=Homo sapiens GN=SYNC - [SYNCI_HUMAN]</a>                                                | 0,65 | 0,14 |
| Q9UN79   | <a href="#">Transcription factor SOX-13 OS=Homo sapiens GN=SOX13 PE=1 SV=3 - [SOX13_HUMAN]</a>                                | 0,74 | 0,14 |
| P43007   | <a href="#">Neutral amino acid transporter A OS=Homo sapiens GN=SLC1A4 PE=1 SV=1 - [SATT_HUMAN]</a>                           | 0,73 | 0,14 |
| O15072   | <a href="#">A disintegrin and metalloproteinase with thrombospondin motifs 3 OS=Homo sapiens GN=ADAMTS3 PE=2 SV=4 - [AT</a>   | 0,75 | 0,14 |
| O75084   | <a href="#">Frizzled-7 OS=Homo sapiens GN=FZD7 PE=2 SV=2 - [FZD7_HUMAN]</a>                                                   | 0,75 | 0,14 |
| P31323   | <a href="#">cAMP-dependent protein kinase type II-beta regulatory subunit OS=Homo sapiens GN=PRKAR2B PE=1 SV=3 - [KAP3_</a>   | 0,74 | 0,14 |
| Q9BX66-9 | <a href="#">Isoform 9 of Sorbin and SH3 domain-containing protein 1 OS=Homo sapiens GN=SORBS1 - [SRBS1_HUMAN]</a>             | 0,71 | 0,14 |
| Q8TED9   | <a href="#">Actin filament-associated protein 1-like 1 OS=Homo sapiens GN=AFAP1L1 PE=2 SV=2 - [AF1L1_HUMAN]</a>               | 0,82 | 0,14 |
| O00505   | <a href="#">Importin subunit alpha-3 OS=Homo sapiens GN=KPNA3 PE=1 SV=2 - [IMA3_HUMAN]</a>                                    | 0,79 | 0,14 |
| Q96F44-3 | <a href="#">Isoform 3 of E3 ubiquitin-protein ligase TRIM11 OS=Homo sapiens GN=TRIM11 - [TRI11_HUMAN]</a>                     | 0,76 | 0,14 |
| Q9Y6M7-2 | <a href="#">Isoform 2 of Sodium bicarbonate cotransporter 3 OS=Homo sapiens GN=SLC4A7 - [S4A7_HUMAN]</a>                      | 0,69 | 0,14 |
| O95427   | <a href="#">GPI ethanolamine phosphate transferase 1 OS=Homo sapiens GN=PIGN PE=1 SV=1 - [PIGN_HUMAN]</a>                     | 0,69 | 0,14 |
| Q6NSZ9-3 | <a href="#">Isoform 3 of Zinc finger protein 498 OS=Homo sapiens GN=ZNF498 - [ZN498_HUMAN]</a>                                | 0,77 | 0,14 |
| Q5JWF2   | <a href="#">Guanine nucleotide-binding protein G(s) subunit alpha isoforms XLas OS=Homo sapiens GN=GNAS PE=1 SV=2 - [GNAS</a> | 0,74 | 0,14 |
| Q03001   | <a href="#">Dystonin OS=Homo sapiens GN=DST PE=1 SV=4 - [DYST_HUMAN]</a>                                                      | 0,75 | 0,14 |
| Q14865-2 | <a href="#">Isoform 2 of AT-rich interactive domain-containing protein 5B OS=Homo sapiens GN=ARID5B - [ARI5B_HUMAN]</a>       | 0,78 | 0,14 |
| Q7L3S4   | <a href="#">Zinc finger protein 771 OS=Homo sapiens GN=ZNF771 PE=1 SV=1 - [ZN771_HUMAN]</a>                                   | 0,73 | 0,14 |
| O43759-2 | <a href="#">Isoform 1B of Synaptogyrin-1 OS=Homo sapiens GN=SYNGR1 - [SNG1_HUMAN]</a>                                         | 0,74 | 0,14 |
| Q155Q3-2 | <a href="#">Isoform 2 of Dixin OS=Homo sapiens GN=DIXDC1 - [DIXC1_HUMAN]</a>                                                  | 0,77 | 0,14 |
| O95677-5 | <a href="#">Isoform 5 of Eyes absent homolog 4 OS=Homo sapiens GN=EYA4 - [EYA4_HUMAN]</a>                                     | 0,64 | 0,14 |
| P33992   | <a href="#">DNA replication licensing factor MCM5 OS=Homo sapiens GN=MCM5 PE=1 SV=5 - [MCM5_HUMAN]</a>                        | 0,71 | 0,14 |
| O95235   | <a href="#">Kinesin-like protein KIF20A OS=Homo sapiens GN=KIF20A PE=1 SV=1 - [KI20A_HUMAN]</a>                               | 0,72 | 0,14 |
| Q86VW0   | <a href="#">SEC14 domain and spectrin repeat-containing protein 1 OS=Homo sapiens GN=SESTD1 PE=1 SV=2 - [SESD1_HUMAN]</a>     | 0,65 | 0,14 |
| Q14186   | <a href="#">Transcription factor Dp-1 OS=Homo sapiens GN=TFDP1 PE=1 SV=1 - [TFDP1_HUMAN]</a>                                  | 0,73 | 0,14 |
| Q93062-4 | <a href="#">Isoform D of RNA-binding protein with multiple splicing OS=Homo sapiens GN=RBPMS - [RBPMS_HUMAN]</a>              | 0,76 | 0,14 |
| P33993   | <a href="#">DNA replication licensing factor MCM7 OS=Homo sapiens GN=MCM7 PE=1 SV=4 - [MCM7_HUMAN]</a>                        | 0,74 | 0,14 |

## A375 vs. A375VR4

|           |                                                                                                                                        |      |      |
|-----------|----------------------------------------------------------------------------------------------------------------------------------------|------|------|
| A6NHR9    | <a href="#">Structural maintenance of chromosomes flexible hinge domain-containing protein 1 OS=Homo sapiens GN=SMCHD1</a>             | 0,70 | 0,14 |
| Q96H20-2  | <a href="#">Isoform 2 of Vacuolar-sorting protein SNF8 OS=Homo sapiens GN=SNF8 - [SNF8 HUMAN]</a>                                      | 0,47 | 0,14 |
| P26012    | <a href="#">Integrin beta-8 OS=Homo sapiens GN=ITGB8 PE=1 SV=1 - [ITB8 HUMAN]</a>                                                      | 0,73 | 0,14 |
| Q86X10-2  | <a href="#">Isoform 2 of Ral GTPase-activating protein subunit beta OS=Homo sapiens GN=RALGAPB - [RLGPB HUMAN]</a>                     | 0,77 | 0,14 |
| O75925    | <a href="#">E3 SUMO-protein ligase PIA1 OS=Homo sapiens GN=PIA1 PE=1 SV=2 - [PIA1 HUMAN]</a>                                           | 0,81 | 0,14 |
| O75354-2  | <a href="#">Isoform 2 of Ectonucleoside triphosphate diphosphohydrolase 6 OS=Homo sapiens GN=ENTPD6 - [ENTP6 HUMAN]</a>                | 0,80 | 0,14 |
| Q8NFV4-4  | <a href="#">Isoform 4 of Abhydrolase domain-containing protein 11 OS=Homo sapiens GN=ABHD11 - [ABHDB HUMAN]</a>                        | 0,75 | 0,14 |
| Q8NE01    | <a href="#">Metal transporter CNNM3 OS=Homo sapiens GN=CNNM3 PE=1 SV=1 - [CNNM3 HUMAN]</a>                                             | 0,78 | 0,14 |
| O75882-3  | <a href="#">Isoform 3 of Attractin OS=Homo sapiens GN=ATRN - [ATRN HUMAN]</a>                                                          | 0,71 | 0,14 |
| O75030-10 | <a href="#">Isoform M2 of Microphthalmia-associated transcription factor OS=Homo sapiens GN=MITF - [MITF HUMAN]</a>                    | 0,66 | 0,14 |
| Q9NQZ5    | <a href="#">StAR-related lipid transfer protein 7, mitochondrial OS=Homo sapiens GN=STARD7 PE=1 SV=2 - [STAR7 HUMAN]</a>               | 0,80 | 0,14 |
| P35712-4  | <a href="#">Isoform 4 of Transcription factor SOX-6 OS=Homo sapiens GN=SOX6 - [SOX6 HUMAN]</a>                                         | 0,73 | 0,14 |
| Q96BS2    | <a href="#">Tescalcin OS=Homo sapiens GN=TESC PE=1 SV=3 - [TESC HUMAN]</a>                                                             | 0,56 | 0,21 |
| Q96CN9    | <a href="#">GRIP and coiled-coil domain-containing protein 1 OS=Homo sapiens GN=GCC1 PE=1 SV=1 - [GCC1 HUMAN]</a>                      | 0,73 | 0,21 |
| Q9NZU0    | <a href="#">Leucine-rich repeat transmembrane protein FLRT3 OS=Homo sapiens GN=FLRT3 PE=1 SV=1 - [FLRT3 HUMAN]</a>                     | 0,77 | 0,21 |
| Q8N0W4    | <a href="#">Neurologin-4, X-linked OS=Homo sapiens GN=NLGN4X PE=1 SV=1 - [NLGNX HUMAN]</a>                                             | 0,78 | 0,21 |
| O95716    | <a href="#">Ras-related protein Rab-3D OS=Homo sapiens GN=RAB3D PE=1 SV=1 - [RAB3D HUMAN]</a>                                          | 0,70 | 0,21 |
| Q9BVL4    | <a href="#">Selenoprotein O OS=Homo sapiens GN=SELO PE=2 SV=3 - [SELO HUMAN]</a>                                                       | 0,74 | 0,21 |
| Q92947-2  | <a href="#">Isoform Short of Glutaryl-CoA dehydrogenase, mitochondrial OS=Homo sapiens GN=GCDH - [GCDH HUMAN]</a>                      | 0,75 | 0,21 |
| Q96HD1    | <a href="#">Cysteine-rich with EGF-like domain protein 1 OS=Homo sapiens GN=CRELD1 PE=1 SV=3 - [CREL1 HUMAN]</a>                       | 0,75 | 0,21 |
| Q14746    | <a href="#">Conserved oligomeric Golgi complex subunit 2 OS=Homo sapiens GN=COG2 PE=1 SV=1 - [COG2 HUMAN]</a>                          | 0,75 | 0,21 |
| Q96ND0    | <a href="#">Protein FAM210A OS=Homo sapiens GN=FAM210A PE=2 SV=2 - [F210A HUMAN]</a>                                                   | 0,69 | 0,21 |
| Q9BZF3-2  | <a href="#">Isoform 2 of Oxysterol-binding protein-related protein 6 OS=Homo sapiens GN=OSBPL6 - [OSBL6 HUMAN]</a>                     | 0,73 | 0,21 |
| Q9HBA0-4  | <a href="#">Isoform 4 of Transient receptor potential cation channel subfamily V member 4 OS=Homo sapiens GN=TRPV4 - [TRPV4 HUMAN]</a> | 0,71 | 0,21 |
| Q7L5N7    | <a href="#">Lysophosphatidylcholine acyltransferase 2 OS=Homo sapiens GN=LPCAT2 PE=1 SV=1 - [PCAT2 HUMAN]</a>                          | 0,74 | 0,21 |
| Q15014    | <a href="#">Mortality factor 4-like protein 2 OS=Homo sapiens GN=MORF4L2 PE=1 SV=1 - [MO4L2 HUMAN]</a>                                 | 0,77 | 0,21 |
| Q9NUT2-2  | <a href="#">Isoform Short of ATP-binding cassette sub-family B member 8, mitochondrial OS=Homo sapiens GN=ABCB8 - [ABCB8 HUMAN]</a>    | 0,72 | 0,21 |
| Q9UHK0    | <a href="#">Nuclear fragile X mental retardation-interacting protein 1 OS=Homo sapiens GN=NUFIP1 PE=1 SV=2 - [NUFIP1 HUMAN]</a>        | 0,75 | 0,21 |
| P33121-2  | <a href="#">Isoform 2 of Long-chain-fatty-acid--CoA ligase 1 OS=Homo sapiens GN=ACSL1 - [ACSL1 HUMAN]</a>                              | 0,71 | 0,21 |
| P42356    | <a href="#">Phosphatidylinositol 4-kinase alpha OS=Homo sapiens GN=PI4KA PE=1 SV=3 - [PI4KA HUMAN]</a>                                 | 0,75 | 0,21 |
| P42765    | <a href="#">3-ketoacyl-CoA thiolase, mitochondrial OS=Homo sapiens GN=ACAA2 PE=1 SV=2 - [THIM HUMAN]</a>                               | 0,73 | 0,21 |
| Q4KMQ1    | <a href="#">Taperin OS=Homo sapiens GN=TPRN PE=2 SV=2 - [TPRN HUMAN]</a>                                                               | 0,78 | 0,21 |
| Q8N474    | <a href="#">Secreted frizzled-related protein 1 OS=Homo sapiens GN=SFRP1 PE=1 SV=1 - [SFRP1 HUMAN]</a>                                 | 0,78 | 0,21 |

## A375 vs. A375VR4

|          |                                                                                                                                                                                                     |      |      |
|----------|-----------------------------------------------------------------------------------------------------------------------------------------------------------------------------------------------------|------|------|
| Q99595   | <a href="#">Mitochondrial import inner membrane translocase subunit Tim17-A OS=Homo sapiens GN=TIMM17A PE=1 SV=1 - [TIMM17A_HUMAN]</a>                                                              | 0,65 | 0,21 |
| O75147-2 | <a href="#">Isoform 2 of Obscurin-like protein 1 OS=Homo sapiens GN=OBSL1 - [OBSL1_HUMAN]</a>                                                                                                       | 0,80 | 0,21 |
| Q9P0W2-3 | <a href="#">Isoform 3 of SWI/SNF-related matrix-associated actin-dependent regulator of chromatin subfamily E member 1-related protein 1 OS=Homo sapiens GN=SMARCA5 PE=1 SV=1 - [SMARCA5_HUMAN]</a> | 0,79 | 0,21 |
| P55809   | <a href="#">Succinyl-CoA:3-ketoacid-coenzyme A transferase 1, mitochondrial OS=Homo sapiens GN=OXCT1 PE=1 SV=1 - [SCOT1_HUMAN]</a>                                                                  | 0,75 | 0,21 |
| Q5TFQ8   | <a href="#">Signal-regulatory protein beta-1 isoform 3 OS=Homo sapiens GN=SIRPB1 PE=1 SV=1 - [SIRBL_HUMAN]</a>                                                                                      | 0,73 | 0,21 |
| P39880-4 | <a href="#">Isoform 5 of Homeobox protein cut-like 1 OS=Homo sapiens GN=CUX1 - [CUX1_HUMAN]</a>                                                                                                     | 0,72 | 0,21 |
| Q9UDR5   | <a href="#">Alpha-aminoadipic semialdehyde synthase, mitochondrial OS=Homo sapiens GN=AASS PE=1 SV=1 - [AASS_HUMAN]</a>                                                                             | 0,74 | 0,21 |
| Q96GY3   | <a href="#">Protein lin-37 homolog OS=Homo sapiens GN=LIN37 PE=1 SV=1 - [LIN37_HUMAN]</a>                                                                                                           | 0,81 | 0,21 |
| Q8N9F0   | <a href="#">N-acetylaspartate synthetase OS=Homo sapiens GN=NAT8L PE=1 SV=3 - [NAT8L_HUMAN]</a>                                                                                                     | 0,70 | 0,21 |
| Q8IW92   | <a href="#">Beta-galactosidase-1-like protein 2 OS=Homo sapiens GN=GLB1L2 PE=2 SV=1 - [GLBL2_HUMAN]</a>                                                                                             | 0,72 | 0,21 |
| Q9Y2S0-2 | <a href="#">Isoform 2 of DNA-directed RNA polymerases I and III subunit RPAC2 OS=Homo sapiens GN=POLR1D - [RPAC2_HUMAN]</a>                                                                         | 0,76 | 0,21 |
| Q99674   | <a href="#">Cell growth regulator with EF hand domain protein 1 OS=Homo sapiens GN=CGREF1 PE=2 SV=2 - [CGRE1_HUMAN]</a>                                                                             | 0,75 | 0,21 |
| Q7Z2Z1-2 | <a href="#">Isoform 2 of Treslin OS=Homo sapiens GN=TICRR - [TICRR_HUMAN]</a>                                                                                                                       | 0,75 | 0,21 |
| Q96RF0-2 | <a href="#">Isoform 2 of Sorting nexin-18 OS=Homo sapiens GN=SNX18 - [SNX18_HUMAN]</a>                                                                                                              | 0,69 | 0,21 |
| Q9UJA3-2 | <a href="#">Isoform 2 of DNA replication licensing factor MCM8 OS=Homo sapiens GN=MCM8 - [MCM8_HUMAN]</a>                                                                                           | 0,74 | 0,21 |
| P52789   | <a href="#">Hexokinase-2 OS=Homo sapiens GN=HK2 PE=1 SV=2 - [HXK2_HUMAN]</a>                                                                                                                        | 0,76 | 0,21 |
| Q7Z7M9   | <a href="#">Polypeptide N-acetylgalactosaminyltransferase 5 OS=Homo sapiens GN=GALNT5 PE=1 SV=1 - [GALT5_HUMAN]</a>                                                                                 | 0,69 | 0,21 |
| Q86YB8   | <a href="#">ERO1-like protein beta OS=Homo sapiens GN=ERO1LB PE=1 SV=2 - [ERO1B_HUMAN]</a>                                                                                                          | 0,78 | 0,21 |
| Q9Y255   | <a href="#">PRELI domain-containing protein 1, mitochondrial OS=Homo sapiens GN=PRELID1 PE=2 SV=1 - [PRLD1_HUMAN]</a>                                                                               | 0,81 | 0,21 |
| O60861-2 | <a href="#">Isoform 2 of Growth arrest-specific protein 7 OS=Homo sapiens GN=GAS7 - [GAS7_HUMAN]</a>                                                                                                | 0,63 | 0,21 |
| Q3V6T2-4 | <a href="#">Isoform 4 of Girdin OS=Homo sapiens GN=CCDC88A - [GRDN_HUMAN]</a>                                                                                                                       | 0,78 | 0,21 |
| Q8WTV0-3 | <a href="#">Isoform 2 of Scavenger receptor class B member 1 OS=Homo sapiens GN=SCARB1 - [SCRB1_HUMAN]</a>                                                                                          | 0,72 | 0,21 |
| O00463   | <a href="#">TNF receptor-associated factor 5 OS=Homo sapiens GN=TRAF5 PE=1 SV=2 - [TRAF5_HUMAN]</a>                                                                                                 | 0,77 | 0,21 |
| P27144   | <a href="#">Adenylate kinase isoenzyme 4, mitochondrial OS=Homo sapiens GN=AK4 PE=1 SV=1 - [KAD4_HUMAN]</a>                                                                                         | 0,78 | 0,21 |
| Q9H857-4 | <a href="#">Isoform 4 of 5'-nucleotidase domain-containing protein 2 OS=Homo sapiens GN=NT5DC2 - [NT5D2_HUMAN]</a>                                                                                  | 0,69 | 0,21 |
| O60568   | <a href="#">Procollagen-lysine,2-oxoglutarate 5-dioxygenase 3 OS=Homo sapiens GN=PLOD3 PE=1 SV=1 - [PLOD3_HUMAN]</a>                                                                                | 0,72 | 0,21 |
| Q9H425   | <a href="#">Uncharacterized protein C1orf198 OS=Homo sapiens GN=C1orf198 PE=1 SV=1 - [CA198_HUMAN]</a>                                                                                              | 0,76 | 0,21 |
| Q8NFG4   | <a href="#">Folliculin OS=Homo sapiens GN=FLCN PE=1 SV=1 - [FLCN_HUMAN]</a>                                                                                                                         | 0,77 | 0,21 |
| O15235   | <a href="#">28S ribosomal protein S12, mitochondrial OS=Homo sapiens GN=MRPS12 PE=1 SV=1 - [RT12_HUMAN]</a>                                                                                         | 0,82 | 0,21 |
| Q9NUA8   | <a href="#">Zinc finger and BTB domain-containing protein 40 OS=Homo sapiens GN=ZBTB40 PE=1 SV=4 - [ZBT40_HUMAN]</a>                                                                                | 0,71 | 0,21 |
| Q96CN5   | <a href="#">Leucine-rich repeat-containing protein 45 OS=Homo sapiens GN=LRR45 PE=2 SV=1 - [LRC45_HUMAN]</a>                                                                                        | 0,56 | 0,21 |
| P30038   | <a href="#">Delta-1-pyrroline-5-carboxylate dehydrogenase, mitochondrial OS=Homo sapiens GN=ALDH4A1 PE=1 SV=3 - [AL4A1_HUMAN]</a>                                                                   | 0,78 | 0,21 |
| Q8IWF2   | <a href="#">FAD-dependent oxidoreductase domain-containing protein 2 OS=Homo sapiens GN=FOXRED2 PE=1 SV=1 - [FXRD2_HUMAN]</a>                                                                       | 0,77 | 0,21 |



## A375 vs. A375VR4

|          |                                                                                                                                      |      |      |
|----------|--------------------------------------------------------------------------------------------------------------------------------------|------|------|
| Q2M1Z3   | <a href="#">Rho GTPase-activating protein 31 OS=Homo sapiens GN=ARHGAP31 PE=1 SV=2 - [RHG31 HUMAN]</a>                               | 0,67 | 0,21 |
| O60266   | <a href="#">Adenylate cyclase type 3 OS=Homo sapiens GN=ADCY3 PE=1 SV=3 - [ADCY3 HUMAN]</a>                                          | 0,72 | 0,21 |
| Q14643-4 | <a href="#">Isoform 4 of Inositol 1,4,5-trisphosphate receptor type 1 OS=Homo sapiens GN=ITPR1 - [ITPR1 HUMAN]</a>                   | 0,78 | 0,21 |
| Q6NT16   | <a href="#">MFS-type transporter C6orf192 OS=Homo sapiens GN=C6orf192 PE=2 SV=1 - [CF192 HUMAN]</a>                                  | 0,73 | 0,21 |
| Q16363-2 | <a href="#">Isoform 2 of Laminin subunit alpha-4 OS=Homo sapiens GN=LAMA4 - [LAMA4 HUMAN]</a>                                        | 0,76 | 0,21 |
| P17483   | <a href="#">Homeobox protein Hox-B4 OS=Homo sapiens GN=HOXB4 PE=1 SV=2 - [HXB4 HUMAN]</a>                                            | 0,77 | 0,21 |
| Q9P2N6-8 | <a href="#">Isoform 8 of Uncharacterized protein KIAA1310 OS=Homo sapiens GN=KIAA1310 - [K1310 HUMAN]</a>                            | 0,77 | 0,21 |
| P78312-4 | <a href="#">Isoform 4 of Protein FAM193A OS=Homo sapiens GN=FAM193A - [F193A HUMAN]</a>                                              | 0,71 | 0,21 |
| Q9UKX7-2 | <a href="#">Isoform 2 of Nuclear pore complex protein Nup50 OS=Homo sapiens GN=NUP50 - [NUP50 HUMAN]</a>                             | 0,77 | 0,21 |
| Q8IXJ9-2 | <a href="#">Isoform 2 of Putative Polycomb group protein ASXL1 OS=Homo sapiens GN=ASXL1 - [ASXL1 HUMAN]</a>                          | 0,79 | 0,41 |
| Q9NZ71-5 | <a href="#">Isoform 5 of Regulator of telomere elongation helicase 1 OS=Homo sapiens GN=RTEL1 - [RTEL1 HUMAN]</a>                    | 0,78 | 0,41 |
| Q8N9F7-3 | <a href="#">Isoform 3 of Glycerophosphodiester phosphodiesterase domain-containing protein 1 OS=Homo sapiens GN=GDPD1 -</a>          | 0,75 | 0,41 |
| Q9H6R3   | <a href="#">Acyl-CoA synthetase short-chain family member 3, mitochondrial OS=Homo sapiens GN=ACSS3 PE=2 SV=1 - [ACSS3 HUMAN]</a>    | 0,72 | 0,41 |
| Q99538   | <a href="#">Legumain OS=Homo sapiens GN=LGMN PE=1 SV=1 - [LGMN HUMAN]</a>                                                            | 0,83 | 0,41 |
| P48729   | <a href="#">Casein kinase I isoform alpha OS=Homo sapiens GN=CSNK1A1 PE=1 SV=2 - [KC1A HUMAN]</a>                                    | 0,79 | 0,41 |
| Q8IZM8   | <a href="#">Zinc finger protein 654 OS=Homo sapiens GN=ZNF654 PE=1 SV=3 - [ZN654 HUMAN]</a>                                          | 0,81 | 0,41 |
| P16885   | <a href="#">1-phosphatidylinositol-4,5-bisphosphate phosphodiesterase gamma-2 OS=Homo sapiens GN=PLCG2 PE=1 SV=4 - [PLCG2 HUMAN]</a> | 0,70 | 0,41 |
| P59768   | <a href="#">Guanine nucleotide-binding protein G(I)/G(S)/G(O) subunit gamma-2 OS=Homo sapiens GN=GNG2 PE=1 SV=2 - [GBG2 HUMAN]</a>   | 0,75 | 0,41 |
| Q96MW5   | <a href="#">Conserved oligomeric Golgi complex subunit 8 OS=Homo sapiens GN=COG8 PE=1 SV=2 - [COG8 HUMAN]</a>                        | 0,80 | 0,41 |
| O15164-2 | <a href="#">Isoform Short of Transcription intermediary factor 1-alpha OS=Homo sapiens GN=TRIM24 - [TIF1A HUMAN]</a>                 | 0,76 | 0,41 |
| P35711-2 | <a href="#">Isoform 2 of Transcription factor SOX-5 OS=Homo sapiens GN=SOX5 - [SOX5 HUMAN]</a>                                       | 0,83 | 0,41 |
| Q9NR19   | <a href="#">Acetyl-coenzyme A synthetase, cytoplasmic OS=Homo sapiens GN=ACSS2 PE=1 SV=1 - [ACSA HUMAN]</a>                          | 0,57 | 0,41 |
| O94782   | <a href="#">Ubiquitin carboxyl-terminal hydrolase 1 OS=Homo sapiens GN=USP1 PE=1 SV=1 - [UBP1 HUMAN]</a>                             | 0,81 | 0,41 |
| Q9HCN8   | <a href="#">Stromal cell-derived factor 2-like protein 1 OS=Homo sapiens GN=SDF2L1 PE=1 SV=2 - [SDF2L HUMAN]</a>                     | 0,72 | 0,41 |
| O95208-2 | <a href="#">Isoform 2 of Epsin-2 OS=Homo sapiens GN=EPN2 - [EPN2 HUMAN]</a>                                                          | 0,79 | 0,41 |
| Q9Y248   | <a href="#">DNA replication complex GINS protein PSF2 OS=Homo sapiens GN=GINS2 PE=1 SV=1 - [PSF2 HUMAN]</a>                          | 0,64 | 0,41 |
| A0MZ66-5 | <a href="#">Isoform 5 of Shootin-1 OS=Homo sapiens GN=KIAA1598 - [SHOT1 HUMAN]</a>                                                   | 0,62 | 0,41 |
| B2RTY4-3 | <a href="#">Isoform 3 of Myosin-IXa OS=Homo sapiens GN=MYO9A - [MYO9A HUMAN]</a>                                                     | 0,68 | 0,41 |
| P56377   | <a href="#">AP-1 complex subunit sigma-2 OS=Homo sapiens GN=AP1S2 PE=1 SV=1 - [AP1S2 HUMAN]</a>                                      | 0,83 | 0,41 |
| P36897   | <a href="#">TGF-beta receptor type-1 OS=Homo sapiens GN=TGFBR1 PE=1 SV=1 - [TGFR1 HUMAN]</a>                                         | 0,69 | 0,41 |
| O43709   | <a href="#">Uncharacterized methyltransferase WBSR22 OS=Homo sapiens GN=WBSR22 PE=1 SV=2 - [WBS22 HUMAN]</a>                         | 0,84 | 0,41 |
| Q9Y2G9-3 | <a href="#">Isoform 2 of Protein strawberry notch homolog 2 OS=Homo sapiens GN=SBNO2 - [SBNO2 HUMAN]</a>                             | 0,83 | 0,41 |
| Q9Y2V7-2 | <a href="#">Isoform 2 of Conserved oligomeric Golgi complex subunit 6 OS=Homo sapiens GN=COG6 - [COG6 HUMAN]</a>                     | 0,76 | 0,41 |

## A375 vs. A375VR4

|          |                                                                                                                                 |      |      |
|----------|---------------------------------------------------------------------------------------------------------------------------------|------|------|
| P10244   | <a href="#">Myb-related protein B OS=Homo sapiens GN=MYBL2 PE=1 SV=1 - [MYBB HUMAN]</a>                                         | 0,65 | 0,41 |
| Q9NS91   | <a href="#">E3 ubiquitin-protein ligase RAD18 OS=Homo sapiens GN=RAD18 PE=1 SV=2 - [RAD18 HUMAN]</a>                            | 0,79 | 0,41 |
| Q92544   | <a href="#">Transmembrane 9 superfamily member 4 OS=Homo sapiens GN=TM9SF4 PE=1 SV=2 - [TM9S4 HUMAN]</a>                        | 0,77 | 0,41 |
| Q5M7Z0-2 | <a href="#">Isoform 2 of RING finger and transmembrane domain-containing protein 1 OS=Homo sapiens GN=RNFT1 - [RNFT1_HUMAN]</a> | 0,80 | 0,41 |
| Q9GZV5   | <a href="#">WW domain-containing transcription regulator protein 1 OS=Homo sapiens GN=WWTR1 PE=1 SV=1 - [WWTR1_HUMAN]</a>       | 0,80 | 0,41 |
| Q6UXH1-4 | <a href="#">Isoform 4 of Cysteine-rich with EGF-like domain protein 2 OS=Homo sapiens GN=CRELD2 - [CRELD2_HUMAN]</a>            | 0,79 | 0,41 |
| Q9UBZ4   | <a href="#">DNA-(apurinic or apyrimidinic site) lyase 2 OS=Homo sapiens GN=APEX2 PE=1 SV=1 - [APEX2_HUMAN]</a>                  | 0,82 | 0,41 |
| P13686   | <a href="#">Tartrate-resistant acid phosphatase type 5 OS=Homo sapiens GN=ACP5 PE=1 SV=3 - [PPA5_HUMAN]</a>                     | 0,76 | 0,41 |
| Q9ULM3   | <a href="#">YEATS domain-containing protein 2 OS=Homo sapiens GN=YEATS2 PE=1 SV=2 - [YETS2_HUMAN]</a>                           | 0,76 | 0,41 |
| Q6PCB5   | <a href="#">Round spermatid basic protein 1-like protein OS=Homo sapiens GN=RSBN1L PE=1 SV=2 - [RSBNL_HUMAN]</a>                | 0,76 | 0,41 |
| O43865   | <a href="#">Putative adenosylhomocysteinase 2 OS=Homo sapiens GN=AHCYL1 PE=1 SV=2 - [SAHH2_HUMAN]</a>                           | 0,79 | 0,41 |
| Q6PIW4-2 | <a href="#">Isoform 2 of Fidgetin-like protein 1 OS=Homo sapiens GN=FIGNL1 - [FIGL1_HUMAN]</a>                                  | 0,83 | 0,41 |
| Q6PJW8   | <a href="#">Consortin OS=Homo sapiens GN=CNST PE=2 SV=3 - [CNST_HUMAN]</a>                                                      | 0,79 | 0,41 |
| Q71F23   | <a href="#">Centromere protein U OS=Homo sapiens GN=MLF1IP PE=1 SV=1 - [CENPU_HUMAN]</a>                                        | 0,76 | 0,41 |
