# Supplementary material for: Silencing FLI or targeting CD13/ANPEP lead to dephosphorylation of EPHA2, a mediator of BRAF inhibitor resistance, and induce growth arrest or apoptosis in melanoma cells
Source: PubMed Central journal article supplement (PMC5596587; doi:10.1038/cddis.2017.406), 2017-08-31
Supplement: cddis2017406x4.pdf [file cddis2017406x4.pdf]

**Supplementary Table S3.** Differentially expressed protein classes in the BRAFi resistant daughter cell lines compared to parental A375

**Differentially expressed protein classes**

- 1 extracellular matrix protein (PC00102)
- 2 protease (PC00190)
- 3 cytoskeletal protein (PC00085)
- 4 transporter (PC00227)  
transmembrane receptor
- 5 regulatory/adaptor protein (PC00226)
- 6 transferase (PC00220)
- 7 oxidoreductase (PC00176)
- 8 lyase (PC00144)
- 9 cell adhesion molecule (PC00069)
- 10 ligase (PC00142)
- 11 nucleic acid binding (PC00171)
- 12 signaling molecule (PC00207)
- 13 enzyme modulator (PC00095)
- 14 calcium-binding protein (PC00060)
- 15 defense/immunity protein (PC00090)
- 16 hydrolase (PC00121)
- 17 transfer/carrier protein (PC00219)
- 18 membrane traffic protein (PC00150)
- 19 phosphatase (PC00181)
- 20 transcription factor (PC00218)
- 21 chaperone (PC00072)
- 22 cell junction protein (PC00070)
- 23 surfactant (PC00212)
- 24 structural protein (PC00211)
- 25 kinase (PC00137)
- 26 storage protein (PC00210)
- 27 receptor (PC00197)
- 28 isomerase (PC00135)
