# Supplementary material for: Silencing FLI or targeting CD13/ANPEP lead to dephosphorylation of EPHA2, a mediator of BRAF inhibitor resistance, and induce growth arrest or apoptosis in melanoma cells
Source: PubMed Central journal article supplement (PMC5596587; doi:10.1038/cddis.2017.406), 2017-08-31
Supplement: cddis2017406x5.pdf [file cddis2017406x5.pdf]

**Supplementary Table S4.** EPHA2 gene copy number analysis of the A375 cell line and the resistant sublines was performed by Taqman assay in four replicates.

| <b>Cell line</b> | <b>CNA value</b> | <b>Average</b> | <b>Number</b> |
|------------------|------------------|----------------|---------------|
| Parental A375    | 3,26             | 3,5825         | 3             |
| Parental A375    | 3,39             |                | 3             |
| Parental A375    | 3,77             |                | 4             |
| Parental A375    | 3,91             |                | 4             |
| A375PR1          | 3,82             | 3,645          | 4             |
| A375PR1          | 3,6              |                | 4             |
| A375PR1          | 3,72             |                | 4             |
| A375PR1          | 3,44             |                | 3             |
| A375VR3          | 5,9              | 4,34           | 6             |
| A375VR3          | 4,25             |                | 4             |
| A375VR3          | 3,44             |                | 3             |
| A375VR3          | 3,77             |                | 4             |
| A375VR4          | 3,61             | 3,7425         | 4             |
| A375VR4          | 3,54             |                | 4             |
| A375VR4          | 3,47             |                | 3             |
| A375VR4          | 4,35             |                | 4             |
