# Supplementary material for: Silencing FLI or targeting CD13/ANPEP lead to dephosphorylation of EPHA2, a mediator of BRAF inhibitor resistance, and induce growth arrest or apoptosis in melanoma cells
Source: PubMed Central journal article supplement (PMC5596587; doi:10.1038/cddis.2017.406), 2017-08-31
Supplement: cddis2017406x6.pdf [file cddis2017406x6.pdf]

Supplementary table S5. Primers used in the study for Sanger sequencing and qPCR.

| Gene, primer | 5' to 3' primers sequence      | Reference sequence | Bases in sequence | Bases in GRCh38 assembly | Amplicon (gDNA) | PCR method |
|--------------|--------------------------------|--------------------|-------------------|--------------------------|-----------------|------------|
| NRASex1-F    | GCTCGCCAATTAACCCTGAT           | NG_007572.1        | 682-701           | Chr1:114716194-114716213 | 213 bp          | 58,BE      |
| NRASex1-R    | CGACAAGTGAGAGACAGGATCA         | NG_007572.1        | 873-894           | Chr1:114716022-114716001 |                 |            |
| NRASex2-F    | GGGCTTGAATAGTTAGATGCT          | NG_007572.1        | 2802-2822         | Chr1:114714093-114714073 | 543 bp          | 58,BE      |
| NRASex2-R    | GGTTCCAAGTCATTCCCAGTA          | NG_007572.1        | 3324-3344         | Chr1:114713571-114713551 |                 |            |
| NRASex3-F    | GCTGAGATTGCAGGCATGA            | NG_007572.1        | 7087-7105         | Chr1:114709790-114709808 | 285 bp          | 58,BE      |
| NRASex3-R    | CAACTGATGCAAACTCTGCACA         | NG_007572.1        | 7349-7371         | Chr1:114709524-114709546 |                 |            |
| KRASex1-F    | GTCACATTTTCATTATTTTATTATAA     | NC_000012.12       | 5509-5535         | Chr12:25245397-25245423  | 155 bp          | 60,NA      |
| KRASex1-R    | TTTACCTCTATTGTTGGATCATATTC     | NC_000012.12       | 5638-5663         | Chr12:25245269-25245294  |                 |            |
| KRASex2-F    | GGTGCACTGTAATAATCCAGACTGT      | NC_000012.12       | 23479-23503       | Chr12:25227429-25227453  | 301 bp          | 60,NA      |
| KRASex2-R    | GCATGGCATTAGCAAAGACTCA         | NC_000012.12       | 23758-23779       | Chr12:25227153-25227174  |                 |            |
| KRASex3-F    | GATATTTGTGTTACTAATGACTGTGCTATA | NC_000012.12       | 25110-25139       | Chr12:25225793-25225822  | 211 bp          | 60,NA      |
| KRASex3-R    | ACCTGTCTTGCTTTGCTGAT           | NC_000012.12       | 25300-25320       | Chr12:25225612-25225632  |                 |            |
| RRASex1-F    | GCGAAGGCAGCAGCAGCGGT           | NC_000019.10       | 20-39             | Chr19:49640105-49640124  | 201 bp          | 58,BE      |
| RRASex1-R    | CTCCCGGGTGAGGGCCCACTA          | NC_000019.10       | 200-220           | Chr19:49639924-49639944  |                 |            |
| RRASex2-F    | GTCTGCCGGGCACTGCAGTA           | NC_000019.10       | 2969-2989         | Chr19:49637155-49637175  | 173 bp          | 58,BE      |
| RRASex2-R    | GACACCACCCCATCCATCAT           | NC_000019.10       | 3121-3141         | Chr19:49637003-49637023  |                 |            |
| RRASex3-F    | GGAGCCTGGTCCCCACGAT            | NC_000019.10       | 3176-3194         | Chr19:49636950-49636968  | 201bp           | 58,BE      |
| RRASex3-R    | GAGCCAGGTCCTCCCACA             | NC_000019.10       | 3357-3376         | Chr19:49636768-49636787  |                 |            |

|             |                          |              |             |                         |        |        |
|-------------|--------------------------|--------------|-------------|-------------------------|--------|--------|
| RRASex4-F   | CCTCATGCCTCCGGCTTCACT    | NC_000019.10 | 3391-3411   | Chr19:49636733-49636753 | 189 bp | 58, BE |
| RRASex4-R   | GGAAGGAGCTCCAGACTGAGAT   | NC_000019.10 | 3556-3579   | Chr19:49636565-49636588 |        |        |
| RRASex5_6-F | CCTGAGTGCAGGACCTGACT     | NC_000019.10 | 4247-4267   | Chr19:49635877-49635897 | 374 bp | 58, BE |
| RRASex5_6-R | CGAAGGCAGCTAGTCCCGAGAGCT | NC_000019.10 | 4597-4620   | Chr19:49635524-49635547 |        |        |
| PTENex1-F   | GCAGCTTCTGCCATCTCTCT     | NG_007466.2  | 980-999     | Chr10:87864418-87864437 | 200 bp | 63, BE |
| PTENex1-R   | CATCCGTCTACTCCACGTT      | NG_007466.2  | 1160-1179   | Chr10:87864598-87864617 |        |        |
| PTENex3-F   | GTGGGGAAAACCTTCTTTTCA    | NG_007466.2  | 30482-30502 | Chr10:87893920-87893940 | 282 bp | 63, BE |
| PTENex3-R   | TCTTTTCTGTGGCTTAGAAATCTT | NG_007466.2  | 30739-30763 | Chr10:87894177-87894201 |        |        |
| PTENex4-F   | AATCTGTCTTTTGGTTTTTCTTGA | NG_007466.2  | 61977-62000 | Chr10:87925415-87925438 | 233 bp | 62, BE |
| PTENex4-R   | ACTCTACCTCACTAACAAGCAGA  | NG_007466.2  | 62185-62209 | Chr10:87925623-87925647 |        |        |
| PTENex5-F   | AAAGATTCAGGCAATGTTTGTT   | NG_007466.2  | 67516-67537 | Chr10:87930954-87930975 | 235 bp | 62, BE |
| PTENex5-R   | TCTCACTCGATAATCTGGATGAC  | NG_007466.2  | 67728-67750 | Chr10:87931166-87931188 |        |        |
| PTENex6i-F  | GGAATCCAGTGTCTTTTAAATACC | NG_007466.2  | 69452-69477 | Chr10:87932890-87932915 | 261 bp | 62, BE |
| PTENex6i-R  | TTCGTCCCTTCCAGCTTTA      | NG_007466.2  | 69693-69712 | Chr10:87933131-87933150 |        |        |
| PTENex6ii-F | TGAAGATCTTGACCAATGGCT    | NG_007466.2  | 69636-69656 | Chr10:87933074-87933094 | 222 bp | 63, BE |
| PTENex6ii-R | CAGATCCAGGAAGAGGAAAGG    | NG_007466.2  | 69837-69857 | Chr10:87933275-87933295 |        |        |
| PTENex10-F  | GGCTACGACCCAGTTACCAT     | NG_007466.2  | 88588-88607 | Chr10:87952026-87952045 | 271 bp | 62, BE |
| PTENex10-R  | TCCAATACATGGAAGGATGAGA   | NG_007466.2  | 88837-88858 | Chr10:87952275-87952296 |        |        |
| PTENex11-F  | CAGTAAAGGCATTTCTGTG      | NG_007466.2  | 94363-94383 | Chr10:87957801-87957821 | 262 bp | 62, BE |
| PTENex11-R  | TCCTTATTTTGGATATTTCTCCC  | NG_007466.2  | 94602-94624 | Chr10:87958040-87958062 |        |        |

|                     |                           |              |                   |                         |         |         |
|---------------------|---------------------------|--------------|-------------------|-------------------------|---------|---------|
| PTENex12-F          | GGACAAAATGTTTCACTTTTGGGTA | NG_007466.2  | 97455-97479       | Chr10:87960893-87960917 | 260 bp  | 62,BE   |
| PTENex12-R          | CAACAACCCCAAAAAATGT       | NG_007466.2  | 97695-97714       | Chr10:87961133-87961152 |         |         |
| PTENex13-F          | GATGAGTCATATTTGTGGGTTTTTC | NG_007466.2  | 101803-101826     | Chr10:87965241-87965264 | 272 bp  | 62,BE   |
| PTENex13-R          | TTATTTTCATGGTGTTTTATCCC   | NG_007466.2  | 102052-102074     | Chr10:87965490-87965512 |         |         |
| CDKN2Aex1a-F        | GAAGAAAGAGGAGGGGCTG       | NC_000009.11 | 19561-19579       | Chr9:21974913-21974931  | 340 bp  | 60,BE   |
| CDKN2Aex1a-R        | GCGCTACCTGATTCCAATTC      | NC_000009.11 | 19881-19900       | Chr9:21974592-21974611  |         |         |
| CDKN2Aex1b-F        | GCGCTGAGGGTGGGAAGAT       | NC_000009.12 | 21994706-21994724 | Chr9:21994706-21994724  | 678 bp  | 56,PCRx |
| CDKN2Aex1b-R        | GCCTGGGCTAGAGACGAATTATCTG | NC_000009.12 | 21994071-21994047 | Chr9:21994071-21994047  |         |         |
| CDKN2Aex2-F         | GGAAATTGGAACTGGAAGC       | NC_000009.11 | 23134-23153       | Chr9:21971339-21971358  | 574 bp  | 59,BE   |
| CDKN2Aex2-R         | GTGAGCTGAGCAAGACC         | NC_000009.11 | 23690-23707       | Chr9:21970785-21970802  |         |         |
| CDKN2Aex3-F         | CAGGCGGGCAGTGGACTAGC      | NC_000009.11 | 26051-26070       | Chr9:21968422-21968441  | 319 bp  | 60,DM   |
| CDKN2Aex3-R         | CTACGAAAGCGGGTGGTTGTG     | NC_000009.11 | 26347-26369       | Chr9:21968123-21968145  |         |         |
| CDK4-F              | GGTGATAGGAGTCTGTGATTGTA   | NG_007484.2  | 688-710           | Chr12:57751738-57751760 | 213 bp  | 62,NA   |
| CDK4-R              | ACCTCACGAACTGTGCTGAT      | NG_007484.2  | 881-900           | Chr12:57751548-57751567 |         |         |
| MC1R-F              | GGTCCAGAGGTGTCGAAAT       | NG_012026.1  | 1044-1062         | Chr16:89918922-89918940 | 1324 bp | 58,BE   |
| MC1R-R              | TGCCAGCACACTTAAAGC        | NG_012026.1  | 2349-2367         | Chr16:89920227-89920245 |         |         |
| MC1R-S1, seq primer | CCATCTCTGACGGGCTCT        | NG_012026.1  | 1496-1513         | Chr16:89919374-89919391 | NA      | 58,BE   |
| MC1R-S3, seq primer | TCCAGCCTCTGCTTCCTG        | NG_012026.1  | 1769-1785         | Chr16:89919646-89919663 | NA      |         |
| RAC1ex1F            | CCGCCGCTTCTATCTCA         | NG_029431.1  | 184-201           | Chr7:6374678-6374695    | 227 bp  | 58,BE   |
| RAC1ex1R            | CCGCGACACAGGCCCA          | NG_029431.1  | 395-410           | Chr7:6374904-6374889    |         |         |
| RAC1ex2F            | GTGAAAGCTAAGATTACAT       | NG_029431.1  | 12660-12679       | Chr7:6387154-6387172    | 231 bp  | 58,BE   |
| RAC1ex2R            | GTTTCATATGAGGATTAAGATGGCT | NG_029431.1  | 12866-12890       | Chr7:6387360-6387384    |         |         |

|            |                              |             |               |                              |        |        |
|------------|------------------------------|-------------|---------------|------------------------------|--------|--------|
| RAC1ex3F   | CTAGGATGGCTGGGACAGT          | NG_029431.1 | 17363-17381   | Chr7: 6391857-6391875        | 271 bp | 58, BE |
| RAC1ex3R   | GCAAGTCCATAGGTAACATGCACT     | NG_029431.1 | 17610-17633   | Chr7: 6392104-6392127        |        |        |
| RAC1ex4F   | GTTGTCCTCAGTCTGACTAACTCA     | NG_029431.1 | 24118-24143   | Chr7: 6398612-6398637        | 209 bp | 58, BE |
| RAC1ex4R   | CACTCAAGGAGCTTGAGGCT         | NG_029431.1 | 24307-24326   | Chr7: 6398801-6398820        |        |        |
| RAC1ex5F   | GTAGAAAGCAAAGTGCATGCTTCA     | NG_029431.1 | 25562-25585   | Chr7: 6400056-6400079        | 183 bp | 58, BE |
| RAC1ex5R   | CTGAGAGGATCATTCTATAACTTACAT  | NG_029431.1 | 25718-25744   | Chr7: 6400238-6400212        |        |        |
| RAC1ex6F   | GTGATTTAGGTGAAGGACATCTGTA    | NG_029431.1 | 27309-27333   | Chr7: 6401803-6401827        | 291 bp | 58, BE |
| RAC1ex6R   | GGACTCCAGTCTGTCTACTACAAT     | NG_029431.1 | 27575-27599   | Chr7: 6402093-6402069        |        |        |
| RAC1ex7F   | GGTGGTGTGATCAGAAGAGAGT       | NG_029431.1 | 27759-27780   | Chr7: 6402253-6402274        | 226 bp | 58, BE |
| RAC1ex7R   | GGGACAGGACCAAGAACGA          | NG_029431.1 | 27966-27984   | Chr7: 6402478-6402460        |        |        |
| METex1F    | CTGAACTGCTCTCGCCTTGA         | NG_008996.1 | 26633-26652   | Chr7: 116699037-116699056    | 703 bp | 58, BE |
| METex1intr | GCCTTCTCACTGATATCGAATGCA     | NG_008996.1 | 27312-27335   | Chr7:<br>116699739-116699716 |        |        |
| METex1intF | CCGGTTCATCAACTCTTTTGTGA      | NG_008996.1 | 27250-27271   | Chr7: 116699654-116699675    | 713 bp | 58, BE |
| METex1R    | GCCCTGGATATTCTTTTTGAGACT     | NG_008996.1 | 27939-27962   | Chr7: 116700366-116700343    |        |        |
| METex2F    | CAGGCTCTGAAAATACACACTGA      | NG_008996.1 | 59176-59198   | Chr7: 116731580-116731602    | 411 bp | 58, BE |
| METex2R    | CAGTCTGTGTTCCAGTTTCTACTATGAT | NG_008996.1 | 59559-59586   | Chr7: 116731990-116731963    |        |        |
| METex3F    | ACTGAGCTTGTGGAATAAGGAT       | NG_008996.1 | 67500-67522   | Chr7: 116739904-116739926    | 251 bp | 58, BE |
| METex3R    | GTGACACTGGTTGTAATATGCAT      | NG_008996.1 | 67727-67750   | Chr7: 116740154-116740131    |        |        |
| METex16F   | CACTGTTCCATAATGAAGTTAATGTCT  | NG_008996.1 | 106326-106352 | Chr7: 116778730-116778756    | 336 bp | 58, BE |
| METex16R   | TGTGCATCTTTGGCTACTAGCT       | NG_008996.1 | 106640-106661 | Chr7: 116779065-116779044    |        |        |
| METex17F   | GGTCAAATTAGAACAGTAGATGCTTA   | NG_008996.1 | 109525-109551 | Chr7: 116781929-116781955    | 229 bp | 58, BE |

| METex17R                                    | GGAAACAGATTCTCTTGTCACT       | NG_008996.1    | 109730-109753 | Chr7: 116782157-116782134                           |               |                               |
|---------------------------------------------|------------------------------|----------------|---------------|-----------------------------------------------------|---------------|-------------------------------|
| METex18F                                    | GGATTTCAAATACTGAAGCCACT      | NG_008996.1    | 110798-110820 | Chr7: 116783202-116783224                           | 418 bp        | 58, BE                        |
| METex18R                                    | GTACGTATCAGACAAGTCCATTTTACAT | NG_008996.1    | 111187-111215 | Chr7: 116783619-116783591                           |               |                               |
| METex19_20F                                 | ATGTATGGTCACATCTCTCACCTCA    | NG_008996.1    | 123201-123225 | Chr7: 116795605-116795629                           | 564 bp        | 58, BE                        |
| METex19_20R                                 | CCATTGGACAAAGTGTGGACTGT      | NG_008996.1    | 123742-123764 | Chr7: 11679614-116796168                            |               |                               |
| <b>Expression primers used in the study</b> |                              |                |               |                                                     |               |                               |
| Primer                                      | Sequence 5' to 3'            | Ref sequence   | Bases         | Coding transcripts                                  | Amplicon size | PCR (A <sub>temp</sub> , mix) |
| EPHA2cDNA-F                                 | CCGCAAGAAGGGGAGACTCCA        | NM_004431.3    | c.1419-1438   | NM_004431                                           | 164 bp        | 60, Max                       |
| EPHA2cDNA-R                                 | ACAGCGTCTGGAATTCGTGC         | NM_004431.3    | c.1563-1582   |                                                     |               |                               |
| FLIcDNA-F                                   | GGATCCAGGGAGTCTCCGGT         | NM_002017.4    | c.223-242     | NM_002017, NM_001271010, NM_001167681               | 192 bp        | 60, Max                       |
| FLIcDNA-R                                   | CACATGCTCCTGTGCCACAGT        | NM_002017.4    | c.393-414     |                                                     |               |                               |
| EFNA1cDNA-F                                 | CCACACCGTCTTCTGGAACA         | NM_004428.2    | c.59-79       | NM_004428, NM_182685                                | 213 bp        | 60, Max                       |
| EFNA1cDNA-R                                 | GCCAGCGGACTTGGTCCT           | NM_004428.2    | c.254-271     |                                                     |               |                               |
| ANPEPcDNA-F                                 | CCAAAATCAGACCAGATTGGC        | NM_001150.2    | c. 1015-1035  | NM_001150                                           | 209 bp        | 60, Max                       |
| ANPEPcDNA-R                                 | CACAGGTCATTCCACCACTCTA       | NM_001150.2    | c. 1202-1223  |                                                     |               |                               |
| CAV1cDNA-F                                  | GTGGTCAAGATTGACTTTGAAGAT     | NM_001753.4    | c. 187-210    | NM_001753, NM_001172896, NM_001172897, NM_001172895 | 249 bp        | 60, Max                       |
| CAV1cDNA-R                                  | GCTGATGCACTGAATCTCAATCA      | NM_001753.4    | c.413-435     |                                                     |               |                               |
| METcDNA-F                                   | CTGGAAGAAGATCACGAAGAT        | NM_001127500.1 | c. 1517-1538  | NM_001127500, NM_000245                             | 128 bp        | 60, Max                       |
| METcDNA-R                                   | CGATCGCACACATTTGTCGT         | NM_001127500.1 | c. 1625-1644  |                                                     |               |                               |
| FH1_CCND1 <sup>A</sup>                      | GCCTTAAGATGAAGGAGAC          | NM_053056.2    | c.328-347     | NM_053056                                           | 94 bp         | 60, Max                       |
| RH1_CCND1 <sup>A</sup>                      | CCATTTGCAGCAGCTC             | NM_053056.2    | c.406-421     |                                                     |               |                               |
| FH3_EGFR <sup>A</sup>                       | TCTTAAAGACCATCCAGGAG         | NM_005228.3    | c.233-252     | NM_005228.3, NM_201282.1, NM_201283.1, NM_201284.1  | 85 bp         | 60, Max                       |
| RH_EGFR <sup>A</sup>                        | ATCTGCAGGTTTTCAAAG           | NM_005228.3    | c.299-317     |                                                     |               |                               |
| KRAScDNA                                    | GATCCAACAATAGAGGATTCTACAG    | NM_004985.3    | c.97-122      | NM_004985, NM_033360                                | 82 bp         | 60, Max                       |
| KRAScDNA-R                                  | CTGCTGTGTCGAGAATATCCAAG      | NM_004985.3    | c.156-178     |                                                     |               |                               |

|              |                                  |                             |                              |                                                                                                  |        |         |
|--------------|----------------------------------|-----------------------------|------------------------------|--------------------------------------------------------------------------------------------------|--------|---------|
| MITFcDNA-F   | CCCAAGTCAAATGATCCAGAC            | NM_198159.2,<br>NM_000248.3 | c.997-1017<br>c.694-714      | NM_198159,<br>NM_198177,<br>NM_006722,<br>NM_000248,<br>NM_198158,<br>NM_198178,<br>NM_001184967 | 129 bp | 60, Max |
| MITFcDNA-R   | CAGTTTCTTCTGTCGGTTTTCAAGT        | NM_198159.2,<br>NM_000248.3 | c.1104-<br>1125<br>c.801-822 |                                                                                                  |        |         |
| RRAScDNA-F   | CGCTGACCATCCAGTTCAT              | NM_006270.4                 | c.131-149                    | NM_006270                                                                                        | 124 bp | 60, Max |
| RRAScDNA-R   | GCGGTGTCCAGGATGTCCA              | NM_006270.4                 | c. 236-254                   |                                                                                                  |        |         |
| SOX10cDNA-F  | GCTCTGGAGGCTGCTGA                | NM_006941.3                 | c.420-436                    | NM_006941                                                                                        | 207 bp | 60, Max |
| SOX10cDNA-R  | CTCTGTAGTGGCCTGGAT               | NM_006941.3                 | c.607-626                    |                                                                                                  |        |         |
| MAP3K8cDNA-F | CTGGAATTTTATTAACATGGTCATCAC<br>T | NM_005204.3                 | c.317-345                    | NM_005204,<br>NM_001244134                                                                       | 181 bp | 60, Max |
| MAP3K8cDNA-R | CACGCCATTCTTTCTTCGTCT            | NM_005204.3                 | c.476-497                    |                                                                                                  |        |         |
| HPRT1cDNA-F  | GACTGCGCAAACAATGCAGAC            | NM_000194.2                 | c.412-434                    | NM_000194                                                                                        | 93 bp  | 60, Max |
| HPRT1cDNA-R  | GGTCCTTTTACCAGCAAGCT             | NM_000194.2                 | c.484-504                    |                                                                                                  |        |         |
| HBMScDNA-F   | ACAACCGGGTGGGGCAGA               | NM_000190.3                 | c.596-613                    | NM_000190,<br>NM_001024382                                                                       | 111 bp | 60, Max |
| HBMScDNA-R   | CCACCAGATCCAAGATGTCCTG           | NM_000190.3                 | c.685-706                    |                                                                                                  |        |         |

A Commercial expression primer sequences from SigmaAldrich.

PCR method is given as annealing temperature, additives BE=betaine 1 M final concentration, NA=no additives, PCRx= PCRx Enhancer system, ThermoFisher Scientific), DM=DMSO 5% final concentration, Max=Maxima SYBR Green qPCR Master Mix, ThermoFisher Scientific.

BRAF mutational analyses on genomic DNA were performed using primers published in Davies H. et al. (2002) Nature 417(6892):949-954.
